# Supplementary material for: Theoretical investigation of mechanism on nickel-catalyzed electrochemical cross-coupling of aryl bromides and arylamines
Source: Royal Society of Chemistry journal article supplement (doi:10.1039/d2cy01798a), 2022-12-27
Supplement: d2cy01798a1.pdf [file d2cy01798a1.pdf]

# Theoretical Investigation of Mechanism on Nickel-Catalyzed Electrochemical Cross-Coupling of Aryl Bromides and Arylamines

Xin Wang,<sup>a</sup> Yueyue Ma,<sup>b</sup> Jinxing Ye,<sup>\*b</sup> Zhen Liu<sup>a</sup> and Ruihua Cheng<sup>\*ab</sup>

<sup>a</sup> School of Chemical Engineering, East China University of Science and Technology, Shanghai 200237, China

<sup>b</sup> School of Biomedical and Pharmaceutical Sciences, Guangdong University of Technology, Guangzhou 510006, China

\*Corresponding author:

E-mail for R.Cheng: [rhcheng@ecust.edu.cn](mailto:rhcheng@ecust.edu.cn); [rhcheng@gdut.edu.cn](mailto:rhcheng@gdut.edu.cn)

E-mail for J.Ye: [yejx@ecust.edu.cn](mailto:yejx@ecust.edu.cn); [jinxingye@gdut.edu.cn](mailto:jinxingye@gdut.edu.cn)

## Contents

|                                                                                                                                                                                                                                                                                                                               |    |
|-------------------------------------------------------------------------------------------------------------------------------------------------------------------------------------------------------------------------------------------------------------------------------------------------------------------------------|----|
| <b>Background</b> .....                                                                                                                                                                                                                                                                                                       | 2  |
| <b>Fig. S1</b> Molecular structure of <b>1a-1e</b> , <b>1g-1h</b> . .....                                                                                                                                                                                                                                                     | 2  |
| <b>Fig. S2</b> Free energy profile for radical addition to <b>3f-s</b> and <b>3f-t</b> . Energies are in kcal/mol. ....                                                                                                                                                                                                       | 2  |
| <b>Fig. S3</b> Free energy profile for radical addition to the Ni(0)(black) and Ni(I)(red) catalyst (kcal/mol). ....                                                                                                                                                                                                          | 3  |
| <b>Fig. S4</b> Steric maps of the nickel catalysts <b>1a'-1h'</b> . The catalysts were oriented by placing the Ni atom at the origin of the sphere, with the mid-point between the N and N atom connecting the Ni atom aligned along the z-axis at negative z values and with two C atoms and one N atom in the xz-plane..... | 3  |
| <b>Table S1</b> Energy barriers (kcal/mol) of reductive elimination. ....                                                                                                                                                                                                                                                     | 4  |
| <b>Calculation of reduction potential</b> .....                                                                                                                                                                                                                                                                               | 4  |
| <b>Energetics and the trend of HOMO of Ni(I) coordination complexes ahead of TS<sub>1,3'</sub></b> . ....                                                                                                                                                                                                                     | 5  |
| <b>Thermal correction to Gibbs Free Energy at M06-D3/def2-SVP, Energy at the M06-D3/def2-TZVPP level (Hartree), and Cartesian coordinates list</b> . ....                                                                                                                                                                     | 6  |
| <b>Reference</b> .....                                                                                                                                                                                                                                                                                                        | 62 |

## Background.

Electrochemical systems have emerged as effective alternatives to conventional redox agents in nickel-catalyzed reductive cross-coupling reactions. Recently, we developed a reductive neutral cross-coupling reaction of aryl bromides and arylamines over nickel/bipyridine catalysts under mild conditions and a broad substrate scope. Terminal oxidants and sacrificial reducing agents can be avoided. Meanwhile, the role of electrolysis in the formation of carbon radicals and the regeneration of low-valent nickel complexes has been demonstrated through a divided-cell experiment and a radical trapping test, but the exact mechanism is still unclear. At the same time, the bipyridine ligands with different substituents showed completely different activities in the experiments, but we did not know the relationship between the ligands and the catalyst activity. Therefore, here we report the detailed mechanism of our nickel-catalyzed electrochemical aminomethylation of aryl bromides using density functional theory (DFT). The effects of catalyst ligands and their substituents on catalytic activity were also analyzed from steric effect analysis, ADCH (dipole moment corrected Hirshfeld population) charge analysis, and frontier molecular orbital (FMO) theory.

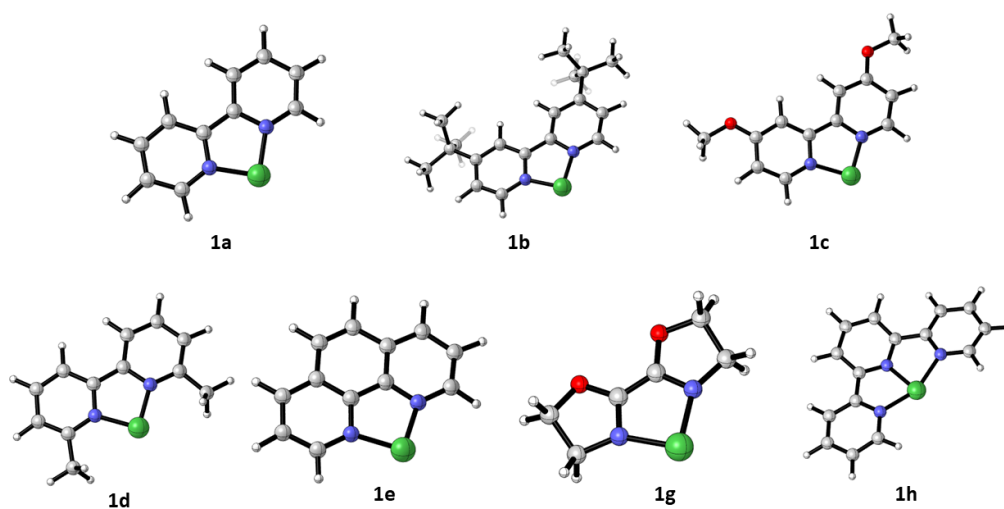

Fig. S1 Molecular structure of 1a-1e, 1g-1h.

Two pathways from **3f-s** and **3f-t** to the **CP-2f-s** product were compared. Starting with **3f-s**, the radical addition product is **5f'-s**. However, **5f'-s** can dissociate to form **3f-s** more easily ( $\Delta G=4.8$  kcal/mol) than undergoing reductive elimination to **CP-2f-s** with the energy barrier of 18.7 kcal/mol, suggesting the reversible radical addition process. Alternatively, via an intersystem crossing ( $\Delta G=15.3$  kcal/mol), **3f-t** is obtained from **3f-s** and undergoes radical addition to **5f-s** with a lower energy of 1.6 kcal/mol than that of **5f'-s**. And the corresponding reductive elimination energy barrier is only 7.1 kcal/mol. Therefore, the latter pathway is favorable.

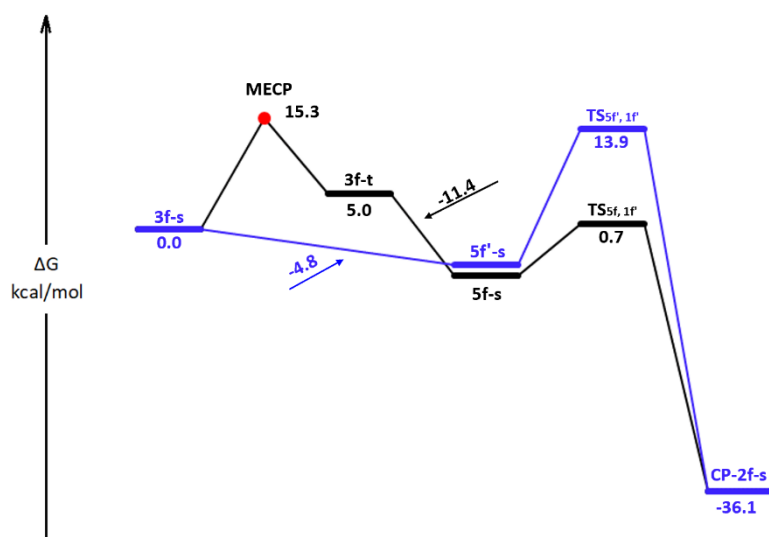

Fig. S2 Free energy profile for radical addition to **3f-s** and **3f-t**. Energies are in kcal/mol.

The presence of the radicals in the Ni(0) and Ni(I) catalysts was calculated (Fig. S3). Based on a relaxed potential energy surface scan on the Ni-C bond (1f-t to III-f-s; 1f'-s to III'-f-s; 3f-t to 5f-s), the barrierless process is presented. Though the oxidative addition of 4-bromotoluene only requires the energy barrier of 9.5 kcal/mol, its product 5f'-s is difficult to continue the subsequent reductive elimination. Therefore, 5f'-s dissociates the stable radicals to form 3f-s. Comparing the free energy barrier of the rate-determining step, the radical addition on Ni(II) is more favorable than on Ni(0) or Ni(I).

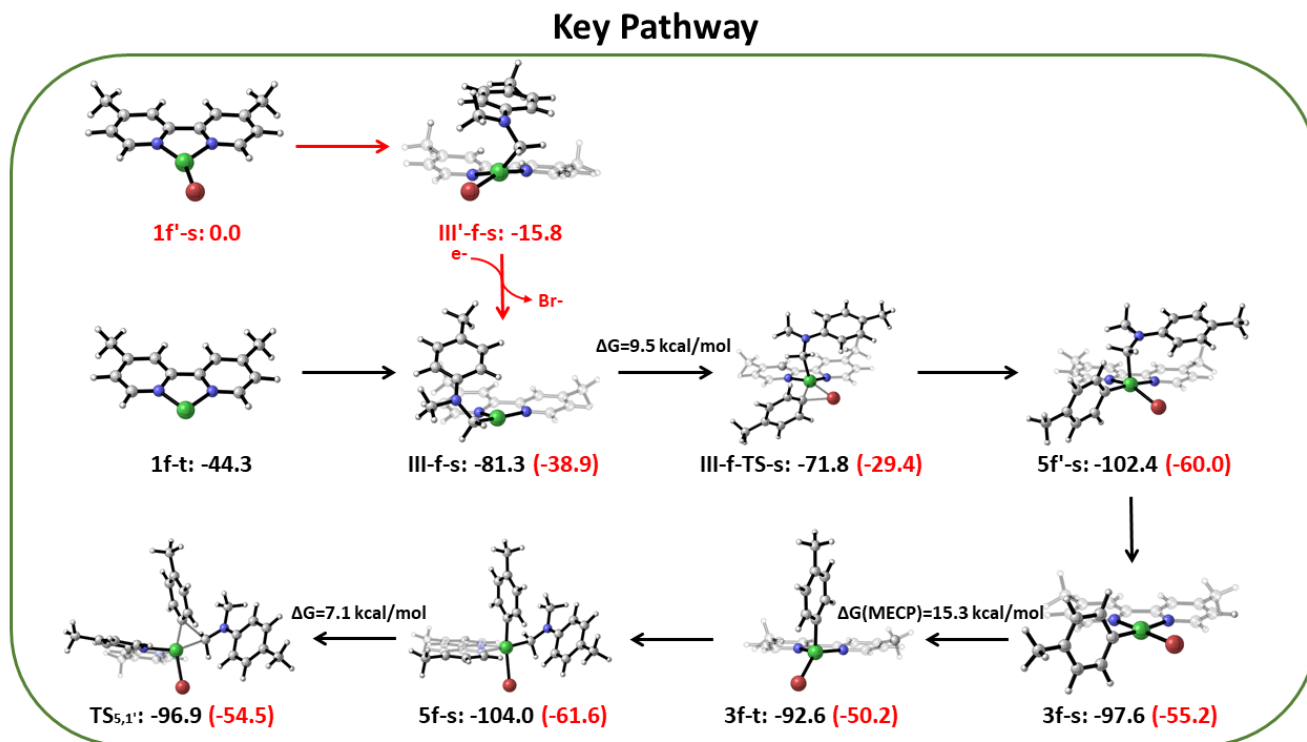

Fig. S3 Free energy profile for radical addition to the Ni(0)(black) and Ni(I)(red) catalyst (kcal/mol).

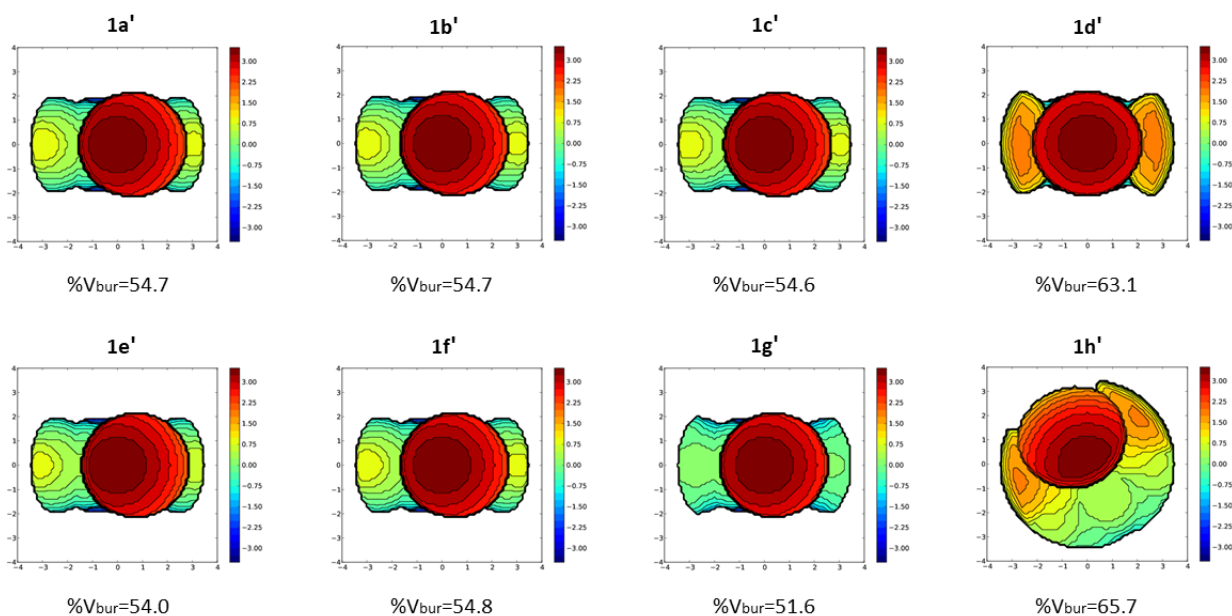

Fig. S4 Steric maps of the nickel catalysts 1a'-1h'. The catalysts were oriented by placing the Ni atom at the origin of the sphere, with the midpoint between the N and N atom connecting the Ni atom aligned along the z-axis at negative z values and with two C atoms and one N atom in the xz-plane.

It should be noted that with Ni(0) as the starting point, by definition, the rate-determining step of the reaction should be the step of reductive elimination. However, through the calculation of the reaction mechanism of different catalysts, it is found that the reaction energy barriers of the two steps of oxidative addition and reductive elimination are similar, and oxidative addition is more subject to the ligands. Therefore, the oxidative addition steps of the two catalytic cycles are compared.

**Table S1** Energy barriers (kcal/mol) of reductive elimination.

| Entry | Ni Cat. | 5→TS <sub>5,1</sub> |
|-------|---------|---------------------|
| 1     | a       | 6.2                 |
| 2     | b       | 7.5                 |
| 3     | c       | 7.1                 |
| 4     | d       | 6.3                 |
| 5     | e       | 7.4                 |
| 6     | f       | 7.1                 |

### Calculation of reduction potential.

Equation (1) was concluded according to the previous studies<sup>1-3</sup>.

$$E_{1/2}^{\text{cal}} (\text{V vs SCE}) = E_{\text{Ox/Red}} + E_{1/2}^{\text{corr}} + C_{\text{DFT}}$$

$$= - \frac{G[\text{reduced}] - G[\text{oxidized}]}{n_e F} + E_{1/2}^{\text{SHE}} + E_{1/2}^{\text{SCE}} + E_j + C_{\text{DFT}} \quad (1)$$

The “G” is the sum of the thermal correction to Gibbs free energy (298.15 K, 1 atm), the free energy of solvation, refined single point energy, and the free energy for the change of 1 atm/1M standard state (1.89 kcal/mol). Notably, the experimental solvation free energy<sup>4</sup> of Br<sup>-</sup> in DMA was used in the calculation. The free energy of the electron (298.15 K, 1 atm) was considered from the reference<sup>5</sup>. The calculated redox potential is converted to SHE ( $E^{\text{SHE}_{1/2}} = -4.281$  V) and then to SCE ( $E^{\text{SCE}_{1/2}} = -0.241$  V vs SHE).<sup>6</sup> Since the correction factor  $E_j$  of DMA solvent in the calculations was not found, the value of DMF solvent<sup>7</sup> with similar properties was used in calculating the reduction potential.

According to the previous study<sup>3</sup>, a training set to determine  $C_{\text{DFT}}(\text{M06})$  was chosen based on the literature redox potentials (in V vs  $\text{Fc}^{+/0}$  in  $\text{CH}_3\text{CN}$ ). The Calculations were performed at the M06/def2-SVP//M06/def2-TZVPP (SMD, solvent= $\text{CH}_3\text{CN}$ ) level with disp3 dispersion corrections for a series of compounds. The total correction factor  $E^{\text{corr}_{1/2}}$  is:  $-4.281$  ( $E^{\text{SHE}_{1/2}}$ )- $0.141$  ( $E^{\text{SCE}_{1/2}}$  vs SHE in  $\text{CH}_3\text{CN}$ )- $0.400$  ( $E^{\text{Fc}_{1/2}}$  vs SCE in  $\text{CH}_3\text{CN}$ ) =  $-4.822$  V. **Fig. S5** shows the  $C_{\text{DFT}}(\text{M06})$  by comparing the experimental and calculated values. The calculated redox potential with  $C_{\text{DFT}}(\text{M06})$  shows no average deviation at  $+0.312$  (**Table S2**).

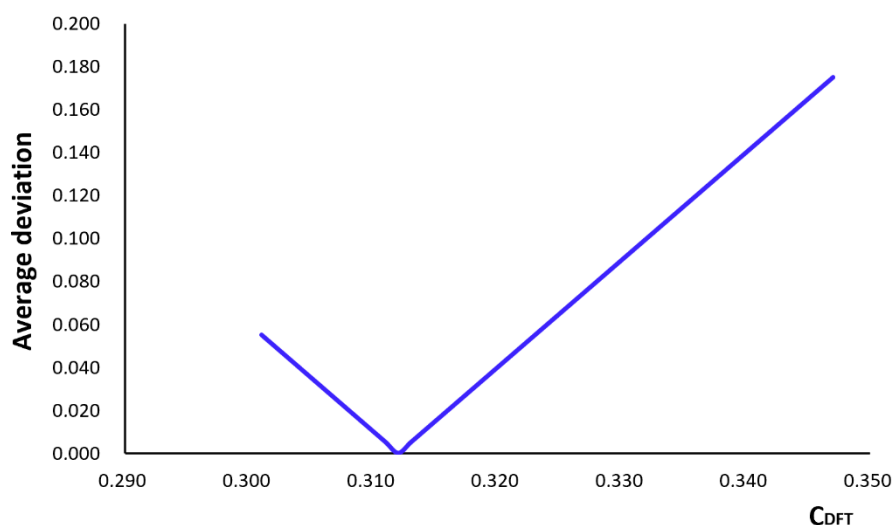

**Fig. S5** Plot of average deviation vs  $C_{\text{DFT}}$ .

**Table S2** Gibbs free energy, calculated redox potentials, and literature reported redox potentials. Calculations were performed at the M06/def2-SVP//M06/def2-TZVPP (SMD, CH<sub>3</sub>CN) level with disp3 dispersion corrections (in V vs Fc<sup>+/0</sup> in CH<sub>3</sub>CN).

| Compound                                              | G <sub>298K</sub> (kcal/mol) | Literature redox potential <sup>3</sup> | Calculated redox potential | Deviation |
|-------------------------------------------------------|------------------------------|-----------------------------------------|----------------------------|-----------|
| anethole                                              | -463.1736                    |                                         |                            |           |
| [anethole] <sup>•+</sup>                              | -463.1736                    | 0.84                                    | 0.708                      | -0.132    |
| N(2,4,6-tribromophenyl) <sub>3</sub>                  | -23910.4794                  |                                         |                            |           |
| [N(2,4,6-tribromophenyl) <sub>3</sub> ] <sup>•+</sup> | -23910.4794                  | 1.36                                    | 1.583                      | 0.223     |
| N(4-bromophenyl) <sub>3</sub>                         | -8469.8136                   |                                         |                            |           |
| [N(4-bromophenyl) <sub>3</sub> ] <sup>•+</sup>        | -8469.6202                   | 0.67                                    | 0.693                      | 0.023     |
| NEt <sub>3</sub>                                      | -292.2985                    |                                         |                            |           |
| [NEt <sub>3</sub> ] <sup>•+</sup>                     | -292.1287                    | 0.47                                    | 0.422                      | -0.048    |
| thianthrene                                           | -1258.2883                   |                                         |                            |           |
| [thianthrenium] <sup>•+</sup>                         | -1258.1634                   | 0.86                                    | 0.794                      | -0.066    |
| average deviation                                     |                              |                                         |                            | 0.000     |

Taking **1f**<sup>•+</sup>+e<sup>-</sup>→**1f**+Br<sup>-</sup> as an example.

$$G_{1f^{\bullet+}} = -4656.1130 \text{ Hartree} \quad G_{e^-} = -3.616 \text{ kJ/mol}$$

$$G_{1f} = -2081.9355 \text{ Hartree} \quad G_{Br^-} = -2574.2567 \text{ Hartree}$$

$$E_{1/2}^{cal} (\text{V vs SCE}) = E_{Ox/Red} + E_{1/2}^{corr} + C_{DFT}$$

$$= - \frac{G[\text{reduced}] - G[\text{oxidized}]}{n_e F} + E_{1/2}^{SHE} + E_{1/2}^{SCE} + E_j(\text{DMF}) + C_{DFT}(\text{M06})$$

$$= -(2625.5 * (-2081.9385 - 2574.2567 + 4656.1160) + 3.616^5) / 96.5 - 4.281^6 - 0.241^6 + 0.172^7 + 0.312$$

$$= -1.9207 \text{ V}$$

$$\Delta G(1f^{\bullet+} \rightarrow 1f) = 23.061 * (-1.9207 \text{ V}) = -44.3 \text{ kcal/mol}$$

### Energetics and the trend of HOMO of Ni(I) coordination complexes ahead of TS<sub>1',3'</sub>.

The free energy and HOMOs of Ni(I) coordination complexes ahead of TS<sub>1',3'</sub> were calculated (Table S3). Only CP-1h' formed by 4-bromotoluene and 1h' has a lower energy of 10.7 kcal/mol than reactants which results in a high energy barrier of 26.2 kcal/mol. Also, compared with the Ni(I) catalyst, all HOMO energy of CP-1' increases, but the correlation with the catalytic performance is not as obvious as uncoordinated Ni(I).

**Table S3** Free energy profile and HOMO energy.

| Entry | Ni Cat.    | ΔG(1'→CP-1') | HOMO energy |
|-------|------------|--------------|-------------|
| 1     | <b>1a'</b> | 5.3          | -5.398      |
| 2     | <b>1b'</b> | 10.8         | -5.348      |
| 3     | <b>1c'</b> | 10.6         | -5.327      |
| 4     | <b>1d'</b> | 7.1          | -5.672      |
| 5     | <b>1e'</b> | 9.7          | -5.500      |
| 6     | <b>1f'</b> | 4.0          | -5.297      |
| 7     | <b>1g'</b> | 12.3         | -5.483      |
| 8     | <b>1h'</b> | -10.7        | -5.100      |

Thermal correction to Gibbs Free Energy at M06-D3/def2-SVP, Energy at the M06-D3/def2-TZVPP level (Hartree), and

Cartesian coordinates list.

1a-t  
Geometry with 21 atoms:  
Thermal correction to Gibbs Free Energy: 0.118268

Total energy: -2003.478013610  
Ni 0.000004 1.898421 -0.000009  
C 0.714708 -0.723777 -0.000021  
C 1.523271 -1.892841 0.000054  
C 2.893839 -1.790147 -0.000039  
C 3.498340 -0.506759 -0.000203  
C 2.665076 0.596910 -0.000230  
C -0.714711 -0.723776 0.000038  
C -1.523276 -1.892839 -0.000004  
C -2.893843 -1.790143 0.000076  
C -3.498343 -0.506753 0.000193  
C -2.665077 0.596914 0.000196  
H 1.048663 -2.878314 0.000222  
H 4.583686 -0.380719 -0.000287  
H 3.086527 1.610316 -0.000331  
H -1.048669 -2.878313 -0.000137  
H -4.583689 -0.380713 0.000263  
H -3.086526 1.610321 0.000264  
N 1.326760 0.523460 -0.000140  
N -1.326761 0.523461 0.000119  
H 3.511453 -2.693780 0.000031  
H -3.511459 -2.693774 0.000031

N -1.325984 1.828310 -0.000053  
N 1.326042 1.828309 -0.000118  
C -3.736879 -1.801650 -0.000025  
C 3.736849 -1.801699 0.000006  
C 3.406273 -2.625489 -1.247312  
H 4.009677 -3.550208 -1.270119  
H 2.344558 -2.921095 -1.278296  
H 3.625279 -2.057133 -2.168147  
C 3.409814 -2.621540 1.250890  
H 4.013159 -3.546278 1.274979  
H 3.631470 -2.050238 2.169266  
H 2.348089 -2.916731 1.285723  
C 5.233981 -1.509549 -0.002653  
H 5.543317 -0.941472 -0.896473  
H 5.546272 -0.940053 0.889219  
H 5.799166 -2.456984 -0.002769  
C -3.406107 -2.625711 -1.247110  
H -2.344414 -2.921413 -1.277820  
H -4.009579 -3.550389 -1.269855  
H -3.624880 -2.057521 -2.168103  
C -3.410270 -2.621310 1.251090  
H -3.632000 -2.049778 2.169303  
H -4.013809 -3.545923 1.275240  
H -2.348611 -2.916702 1.286198  
C -5.233969 -1.509356 -0.003110  
H -5.546379 -0.939478 0.888475  
H -5.543053 -0.941595 -0.897217  
H -5.799251 -2.456736 -0.002970

1b-t  
Geometry with 45 atoms:  
Thermal correction to Gibbs Free Energy: 0.324424

Total energy: -2317.856379930  
Ni 0.000028 3.204419 0.000126  
C -0.714788 0.580467 -0.000186  
C -1.523264 -0.587074 -0.000339  
C -2.903641 -0.520676 -0.000476  
C -3.490066 0.776991 -0.000346  
C -2.660746 1.885786 -0.000129  
C 0.714839 0.580467 -0.000191  
C 1.523308 -0.587078 -0.000290  
C 2.903680 -0.520689 -0.000450  
C 3.490118 0.776976 -0.000397  
C 2.660806 1.885775 -0.000213  
H -1.029627 -1.564037 -0.000266  
H -4.571224 0.926387 -0.000429  
H -3.096016 2.893578 -0.000009  
H 1.029669 -1.564044 -0.000141  
H 4.571274 0.926369 -0.000509  
H 3.096082 2.893564 -0.000146

1c-t  
Geometry with 29 atoms:  
Thermal correction to Gibbs Free Energy: 0.175287

Total energy: -2232.496336920  
Ni -0.000000 2.569824 0.000111  
C -0.712774 -0.056476 -0.000243  
C -1.515554 -1.230684 -0.000293  
C -2.895320 -1.135475 -0.000204  
C -3.504524 0.146386 -0.000323  
C -2.659521 1.249863 -0.000222  
C 0.712774 -0.056477 -0.000129  
C 1.515553 -1.230686 -0.000129  
C 2.895319 -1.135477 -0.000004  
C 3.504525 0.146381 0.000160  
C 2.659523 1.249859 0.000173  
H -1.061763 -2.225563 -0.000384  
H -4.585864 0.289861 -0.000638  
H -3.094123 2.257803 -0.000278

|   |           |           |           |
|---|-----------|-----------|-----------|
| H | 1.061762  | -2.225564 | -0.000199 |
| H | 4.585866  | 0.289855  | 0.000270  |
| H | 3.094127  | 2.257798  | 0.000300  |
| N | -1.330665 | 1.189494  | -0.000132 |
| N | 1.330667  | 1.189493  | 0.000032  |
| O | -3.590792 | -2.287993 | -0.000902 |
| O | 3.590790  | -2.287995 | 0.000000  |
| C | -4.995287 | -2.237431 | 0.001146  |
| H | -5.393821 | -1.732713 | -0.896938 |
| H | -5.353871 | -3.275804 | 0.002849  |
| H | -5.390957 | -1.730693 | 0.899340  |
| C | 4.995286  | -2.237427 | 0.000092  |
| H | 5.392337  | -1.731822 | 0.898324  |
| H | 5.353879  | -3.275799 | -0.000031 |
| H | 5.392432  | -1.731573 | -0.897958 |

1d-t

Geometry with 27 atoms:

Thermal correction to Gibbs Free Energy: 0.16618

Total energy: -2082.089425060

|    |           |           |           |
|----|-----------|-----------|-----------|
| Ni | 0.000000  | 1.610156  | -0.000003 |
| C  | 0.715256  | -1.023940 | 0.000058  |
| C  | 1.531423  | -2.184691 | 0.000374  |
| C  | 2.900830  | -2.058146 | 0.000347  |
| C  | 3.490568  | -0.768348 | 0.000031  |
| C  | 2.656389  | 0.340332  | -0.000137 |
| C  | -0.715256 | -1.023940 | -0.000057 |
| C  | -1.531423 | -2.184691 | -0.000375 |
| C  | -2.900830 | -2.058146 | -0.000348 |
| C  | -3.490568 | -0.768348 | -0.000031 |
| C  | -2.656389 | 0.340332  | 0.000139  |
| H  | 1.067267  | -3.175293 | 0.000755  |
| H  | 4.576113  | -0.636426 | -0.000037 |
| H  | -1.067267 | -3.175293 | -0.000757 |
| H  | -4.576113 | -0.636426 | 0.000038  |
| N  | 1.315601  | 0.224566  | -0.000099 |
| N  | -1.315601 | 0.224566  | 0.000101  |
| H  | -3.533676 | -2.951182 | -0.000630 |
| H  | 3.533676  | -2.951182 | 0.000627  |
| C  | 3.168154  | 1.742739  | -0.000336 |
| H  | 2.788817  | 2.284114  | -0.885211 |
| H  | 2.789153  | 2.284236  | 0.884614  |
| H  | 4.266674  | 1.792719  | -0.000531 |
| C  | -3.168154 | 1.742739  | 0.000342  |
| H  | -2.788828 | 2.284107  | 0.885226  |
| H  | -2.789142 | 2.284243  | -0.884598 |
| H  | -4.266674 | 1.792719  | 0.000525  |

1e-t

Geometry with 23 atoms:

Thermal correction to Gibbs Free Energy: 0.13042

Total energy: -2079.678437830

|    |           |           |           |
|----|-----------|-----------|-----------|
| Ni | 0.000001  | 2.257614  | -0.000040 |
| C  | 0.703282  | -0.339094 | -0.000043 |
| C  | 1.435357  | -1.566534 | -0.000063 |
| C  | 2.826472  | -1.510483 | -0.000050 |
| C  | 3.465105  | -0.252565 | -0.000086 |
| C  | 2.686467  | 0.897310  | -0.000111 |
| C  | -0.703284 | -0.339092 | 0.000052  |
| C  | -1.435357 | -1.566533 | 0.000121  |
| C  | -2.826473 | -1.510484 | 0.000107  |
| C  | -3.465106 | -0.252564 | 0.000095  |
| C  | -2.686470 | 0.897310  | 0.000074  |
| H  | 4.554794  | -0.168483 | -0.000080 |
| H  | -4.554795 | -0.168482 | 0.000088  |
| N  | 1.347413  | 0.890888  | -0.000072 |
| N  | -1.347413 | 0.890890  | 0.000033  |
| H  | -3.405629 | -2.439914 | 0.000096  |
| H  | 3.405629  | -2.439913 | -0.000002 |
| C  | 0.680341  | -2.792475 | 0.000071  |
| C  | -0.680340 | -2.792474 | 0.000037  |
| H  | 3.163241  | 1.885325  | -0.000129 |
| H  | -3.163243 | 1.885325  | 0.000053  |
| H  | 1.236149  | -3.736711 | 0.000157  |
| H  | -1.236149 | -3.736709 | -0.000013 |

1f-s

Geometry with 27 atoms:

Thermal correction to Gibbs Free Energy: 0.168531

Total energy: -2082.047430480

|    |           |           |           |
|----|-----------|-----------|-----------|
| Ni | 0.000002  | 2.217832  | 0.000004  |
| C  | 0.707974  | -0.367725 | -0.066662 |
| C  | 1.556059  | -1.485539 | 0.098530  |
| C  | 2.928790  | -1.356886 | 0.070110  |
| C  | 3.451010  | -0.038390 | -0.100049 |
| C  | 2.593681  | 1.016547  | -0.285019 |
| C  | -0.707974 | -0.367725 | 0.066649  |
| C  | -1.556061 | -1.485539 | -0.098539 |
| C  | -2.928792 | -1.356883 | -0.070109 |
| C  | -3.451010 | -0.038387 | 0.100051  |
| C  | -2.593679 | 1.016549  | 0.285016  |
| H  | 1.104965  | -2.463671 | 0.303748  |
| H  | 4.532825  | 0.128961  | -0.124154 |
| H  | 2.982678  | 2.028103  | -0.455927 |
| H  | -1.104971 | -2.463672 | -0.303759 |
| H  | -4.532826 | 0.128964  | 0.124161  |
| H  | -2.982673 | 2.028107  | 0.455924  |
| N  | 1.242313  | 0.889734  | -0.354488 |

|   |           |           |           |
|---|-----------|-----------|-----------|
| N | -1.242312 | 0.889733  | 0.354478  |
| C | 3.852908  | -2.516884 | 0.249514  |
| H | 4.499842  | -2.389377 | 1.135430  |
| H | 3.302607  | -3.462677 | 0.367288  |
| H | 4.532924  | -2.625897 | -0.613780 |
| C | -3.852912 | -2.516881 | -0.249503 |
| H | -4.499861 | -2.389370 | -1.135407 |
| H | -3.302614 | -3.462673 | -0.367290 |
| H | -4.532914 | -2.625897 | 0.613802  |

1f-t

Geometry with 27 atoms:

Thermal correction to Gibbs Free Energy: 0.167933

Total energy: -2082.080371410

|    |           |           |           |
|----|-----------|-----------|-----------|
| Ni | 0.000006  | 2.310283  | -0.000001 |
| C  | 0.714617  | -0.312694 | -0.000003 |
| C  | 1.522249  | -1.484101 | 0.000108  |
| C  | 2.898225  | -1.405101 | 0.000052  |
| C  | 3.491040  | -0.109055 | -0.000116 |
| C  | 2.663892  | 0.997649  | -0.000169 |
| C  | -0.714620 | -0.312693 | 0.000007  |
| C  | -1.522254 | -1.484099 | -0.000080 |
| C  | -2.898230 | -1.405095 | -0.000040 |
| C  | -3.491043 | -0.109048 | 0.000087  |
| C  | -2.663892 | 0.997654  | 0.000126  |
| H  | 1.043819  | -2.469205 | 0.000284  |
| H  | 4.578820  | 0.010988  | -0.000179 |
| H  | 3.092688  | 2.008161  | -0.000265 |
| H  | -1.043826 | -2.469203 | -0.000224 |
| H  | -4.578823 | 0.010996  | 0.000132  |
| H  | -3.092685 | 2.008168  | 0.000197  |
| N  | 1.326333  | 0.932970  | -0.000111 |
| N  | -1.326334 | 0.932972  | 0.000086  |
| C  | 3.765152  | -2.620437 | 0.000207  |
| H  | 4.428852  | -2.636494 | 0.882743  |
| H  | 3.174637  | -3.549344 | 0.000150  |
| H  | 4.429110  | -2.636537 | -0.882132 |
| C  | -3.765160 | -2.620429 | -0.000163 |
| H  | -4.428881 | -2.636492 | -0.882683 |
| H  | -3.174649 | -3.549339 | -0.000109 |
| H  | -4.429098 | -2.636517 | 0.882191  |

1g-t

Geometry with 19 atoms:

Thermal correction to Gibbs Free Energy: 0.105427

Total energy: -2001.532542790

|    |           |           |           |
|----|-----------|-----------|-----------|
| Ni | -1.831701 | 0.031394  | 0.000000  |
| N  | -0.449283 | 0.023010  | -1.354856 |
| C  | 0.717639  | -0.039790 | -0.699330 |

|   |           |           |           |
|---|-----------|-----------|-----------|
| C | -0.127918 | -0.127757 | -2.759996 |
| C | 1.366813  | 0.180953  | -2.802270 |
| H | -0.338894 | -1.157847 | -3.118581 |
| H | 1.937911  | -0.422904 | -3.523146 |
| N | -0.449283 | 0.023010  | 1.354856  |
| C | -0.127918 | -0.127757 | 2.759996  |
| C | 0.717639  | -0.039790 | 0.699330  |
| C | 1.366813  | 0.180953  | 2.802270  |
| H | -0.706458 | 0.555733  | 3.404494  |
| H | 1.937911  | -0.422904 | 3.523146  |
| O | 1.825555  | -0.113389 | -1.479962 |
| O | 1.825555  | -0.113389 | 1.479962  |
| H | -0.706458 | 0.555733  | -3.404494 |
| H | 1.552595  | 1.251114  | -3.017416 |
| H | -0.338894 | -1.157847 | 3.118581  |
| H | 1.552595  | 1.251114  | 3.017416  |

1h-t

Geometry with 30 atoms:

Thermal correction to Gibbs Free Energy: 0.182455

Total energy: -2250.501865370

|    |           |           |           |
|----|-----------|-----------|-----------|
| C  | -2.728307 | 0.117350  | -1.222786 |
| C  | -1.312832 | -0.085954 | -1.181364 |
| N  | -0.713566 | -0.273643 | -0.000000 |
| C  | -1.312832 | -0.085954 | 1.181364  |
| C  | -2.728307 | 0.117350  | 1.222786  |
| C  | -3.400069 | 0.188252  | -0.000000 |
| C  | -0.379427 | -0.037492 | -2.287696 |
| C  | -0.379427 | -0.037492 | 2.287696  |
| C  | -0.772631 | -0.115200 | 3.639950  |
| C  | 0.175035  | -0.052055 | 4.641921  |
| C  | 1.532054  | 0.098745  | 4.298960  |
| C  | 1.855180  | 0.201637  | 2.955166  |
| N  | 0.951945  | 0.161683  | -1.966357 |
| N  | 0.951945  | 0.161683  | 1.966357  |
| C  | 1.855180  | 0.201637  | -2.955166 |
| C  | 1.532054  | 0.098745  | -4.298960 |
| C  | 0.175035  | -0.052055 | -4.641921 |
| C  | -0.772631 | -0.115200 | -3.639950 |
| Ni | 1.290877  | -0.145703 | 0.000000  |
| H  | -3.262923 | 0.240184  | -2.168087 |
| H  | -3.262923 | 0.240184  | 2.168087  |
| H  | -4.484596 | 0.342948  | -0.000000 |
| H  | -1.830164 | -0.255615 | 3.880394  |
| H  | -0.126969 | -0.128203 | 5.690329  |
| H  | 2.313545  | 0.157548  | 5.059337  |
| H  | 2.896175  | 0.353487  | 2.647146  |
| H  | 2.896175  | 0.353487  | -2.647146 |
| H  | 2.313545  | 0.157548  | -5.059337 |



H -0.126969 -0.128203 -5.690329  
H -1.830164 -0.255615 -3.880394

1a<sup>1</sup>-s

Geometry with 22 atoms:

Thermal correction to Gibbs Free Energy: 0.118011

Total energy: -4577.656535100

Ni -0.872046 -0.378224 -0.000345  
C 1.925223 -0.404417 0.000026  
C 3.235493 -0.880256 0.000402  
C 3.457232 -2.253198 0.000341  
C 2.362300 -3.114801 -0.000117  
C 1.085907 -2.566923 -0.000502  
C 1.564058 1.025836 -0.000001  
C 2.486938 2.071350 0.000906  
C 2.019250 3.381239 0.000715  
C 0.645443 3.613215 -0.000349  
C -0.210894 2.518286 -0.001148  
H 4.077946 -0.185632 0.000712  
H 2.490594 -4.199066 -0.000192  
H 0.195245 -3.203728 -0.000860  
H 3.559982 1.869008 0.001836  
H 0.239178 4.626640 -0.000519  
H -1.299701 2.642346 -0.001927  
N 0.867211 -1.246773 -0.000448  
N 0.235585 1.260426 -0.001005  
H 4.476722 -2.645914 0.000621  
H 2.724904 4.215464 0.001412  
Br -3.176939 -0.370469 0.000489

1b<sup>1</sup>-s

Geometry with 46 atoms:

Thermal correction to Gibbs Free Energy: 0.325871

Total energy: -4892.039928160

Ni -1.924644 -1.307699 -0.000942  
C 0.755995 -0.483888 -0.000813  
C 2.144300 -0.538803 -0.000517  
C 2.808847 -1.772264 -0.000086  
C 2.003444 -2.915876 -0.000311  
C 0.620201 -2.787588 -0.001052  
C -0.023140 0.770341 -0.000669  
C 0.536728 2.042355 0.000218  
C -0.283788 3.178640 -0.000364  
C -1.664979 2.956384 -0.001465  
C -2.153659 1.655081 -0.001811  
H 2.715384 0.393769 -0.000803  
H 2.433401 -3.919242 0.000009  
H -0.024403 -3.673406 -0.001661  
H 1.624663 2.150458 0.001456

H -2.378001 3.782994 -0.002010  
H -3.231745 1.456328 -0.002212  
N -0.000912 -1.605654 -0.001251  
N -1.360260 0.585450 -0.001494  
C 4.330522 -1.819794 0.000429  
C 0.339903 4.567391 0.000483  
C 1.209455 4.723131 -1.250160  
H 1.662826 5.728958 -1.270971  
H 2.030814 3.988511 -1.281945  
H 0.610136 4.602980 -2.169045  
C 1.206907 4.722444 1.253041  
H 1.660118 5.728295 1.275339  
H 0.605582 4.601749 2.170552  
H 2.028119 3.987731 1.286020  
C -0.716049 5.666268 -0.000303  
H -1.360570 5.620623 -0.894445  
H -1.362202 5.620427 0.892649  
H -0.222497 6.652185 0.000257  
C 4.851414 -1.108619 -1.251545  
H 4.549372 -0.048967 -1.286165  
H 5.954267 -1.140173 -1.271642  
H 4.481921 -1.597542 -2.169354  
C 4.850672 -1.107221 1.251956  
H 4.480258 -1.594860 2.170079  
H 5.953498 -1.139269 1.272992  
H 4.549046 -0.047419 1.284972  
C 4.854925 -3.250742 0.001417  
H 4.530289 -3.810002 0.895214  
H 4.530891 -3.811040 -0.891942  
H 5.957450 -3.239934 0.001762  
Br -4.068302 -2.100560 0.001308

1c<sup>1</sup>-s

Geometry with 30 atoms:

Thermal correction to Gibbs Free Energy: 0.176149

Total energy: -4806.682639010

Ni -0.995722 -1.331995 0.000019  
C 0.203152 1.224141 -0.000011  
C 0.367970 2.599133 -0.000007  
C -0.766586 3.423916 -0.000024  
C -2.032023 2.821024 -0.000041  
C -2.095683 1.434252 -0.000044  
C 1.321844 0.258200 0.000013  
C 2.655980 0.629192 -0.000013  
C 3.645698 -0.364459 0.000013  
C 3.241372 -1.706005 0.000066  
C 1.881411 -1.981718 0.000087  
H 1.357710 3.062036 0.000011  
H -2.955885 3.402166 -0.000053

|    |           |           |           |
|----|-----------|-----------|-----------|
| H  | -3.065040 | 0.922323  | -0.000061 |
| H  | 2.960302  | 1.678825  | -0.000056 |
| H  | 3.955846  | -2.531073 | 0.000089  |
| H  | 1.531525  | -3.019737 | 0.000129  |
| N  | -1.019621 | 0.648479  | -0.000031 |
| N  | 0.934039  | -1.040267 | 0.000063  |
| O  | -0.550841 | 4.737309  | -0.000024 |
| O  | 4.911209  | 0.047931  | -0.000014 |
| C  | -1.660328 | 5.613036  | 0.000002  |
| H  | -2.284076 | 5.474490  | 0.899607  |
| H  | -1.258303 | 6.634093  | 0.000031  |
| H  | -2.284079 | 5.474541  | -0.899608 |
| C  | 5.944163  | -0.916625 | 0.000000  |
| H  | 5.901545  | -1.554035 | -0.899635 |
| H  | 6.892779  | -0.364997 | -0.000030 |
| H  | 5.901571  | -1.553981 | 0.899675  |
| Br | -2.837125 | -2.687791 | -0.000023 |

1d'-s

Geometry with 28 atoms:

Thermal correction to Gibbs Free Energy: 0.16647

Total energy: -4656.271151830

|    |           |           |           |
|----|-----------|-----------|-----------|
| Ni | -0.815360 | -0.000010 | 0.000003  |
| C  | 1.903187  | 0.737947  | -0.003816 |
| C  | 3.060192  | 1.513681  | -0.024528 |
| C  | 2.931357  | 2.898262  | -0.028003 |
| C  | 1.661363  | 3.464131  | -0.010808 |
| C  | 0.539374  | 2.632704  | 0.007070  |
| C  | 1.903201  | -0.737917 | 0.003812  |
| C  | 3.060219  | -1.513632 | 0.024515  |
| C  | 2.931407  | -2.898215 | 0.027995  |
| C  | 1.661422  | -3.464105 | 0.010811  |
| C  | 0.539419  | -2.632698 | -0.007059 |
| H  | 4.047437  | 1.047467  | -0.041496 |
| H  | 1.525376  | 4.548785  | -0.012441 |
| H  | 4.047456  | -1.047401 | 0.041473  |
| H  | 1.525455  | -4.548761 | 0.012449  |
| N  | 0.674304  | 1.295110  | 0.008932  |
| N  | 0.674327  | -1.295101 | -0.008925 |
| H  | 3.821052  | -3.533322 | 0.044599  |
| H  | 3.820991  | 3.533385  | -0.044614 |
| C  | -0.849706 | 3.165228  | 0.031923  |
| H  | -1.441036 | 2.732822  | -0.792180 |
| H  | -1.360118 | 2.862948  | 0.962180  |
| H  | -0.867674 | 4.261630  | -0.042115 |
| C  | -0.849652 | -3.165246 | -0.031904 |
| H  | -1.440996 | -2.732821 | 0.792180  |
| H  | -1.360062 | -2.863007 | -0.962176 |
| H  | -0.867603 | -4.261645 | 0.042170  |

|    |           |           |           |
|----|-----------|-----------|-----------|
| Br | -3.114609 | -0.000020 | -0.000007 |
|----|-----------|-----------|-----------|

1e'-s

Geometry with 24 atoms:

Thermal correction to Gibbs Free Energy: 0.130582

Total energy: -4653.856698330

|    |           |           |           |
|----|-----------|-----------|-----------|
| Ni | -1.263136 | -0.388124 | 0.000023  |
| C  | 1.260310  | 0.800335  | 0.000006  |
| C  | 2.342619  | 1.702239  | -0.000013 |
| C  | 2.027036  | 3.077097  | -0.000008 |
| C  | 0.702142  | 3.467833  | 0.000018  |
| C  | -0.304830 | 2.487914  | 0.000036  |
| C  | 1.498982  | -0.611600 | 0.000014  |
| C  | 2.819332  | -1.102844 | -0.000015 |
| C  | 2.982816  | -2.503911 | -0.000016 |
| C  | 1.862538  | -3.312020 | 0.000010  |
| C  | 0.587137  | -2.726116 | 0.000038  |
| H  | 0.425503  | 4.524079  | 0.000028  |
| H  | 1.951506  | -4.400308 | 0.000006  |
| N  | -0.035874 | 1.191266  | 0.000031  |
| N  | 0.400978  | -1.410771 | 0.000037  |
| H  | 3.989665  | -2.931330 | -0.000048 |
| H  | 2.833260  | 3.816615  | -0.000014 |
| Br | -3.551886 | -0.088707 | -0.000030 |
| C  | 3.677777  | 1.178692  | -0.000010 |
| C  | 3.905386  | -0.165330 | -0.000066 |
| H  | 4.512594  | 1.885506  | -0.000017 |
| H  | 4.926538  | -0.557682 | -0.000097 |
| H  | -1.364849 | 2.766439  | 0.000052  |
| H  | -0.313611 | -3.348326 | 0.000062  |

1f'-s

Geometry with 28 atoms:

Thermal correction to Gibbs Free Energy: 0.166192

Total energy: -4656.260317440

|    |           |           |           |
|----|-----------|-----------|-----------|
| Ni | 1.299912  | -0.414322 | 0.000242  |
| Br | 3.585325  | -0.447415 | 0.001342  |
| C  | -1.501770 | -0.513398 | -0.001011 |
| C  | -2.799498 | -1.020215 | -0.002837 |
| C  | -3.012581 | -2.400202 | -0.003348 |
| C  | -1.877847 | -3.222645 | -0.003756 |
| C  | -0.616444 | -2.650090 | -0.001663 |
| C  | -1.176230 | 0.926249  | -0.001082 |
| C  | -2.124424 | 1.947599  | -0.002791 |
| C  | -1.711094 | 3.281635  | -0.003363 |
| C  | -0.331386 | 3.528415  | -0.003841 |
| C  | 0.553143  | 2.461589  | -0.001868 |
| H  | -3.656257 | -0.340150 | -0.004976 |
| H  | -1.981592 | -4.311734 | -0.006733 |

|   |           |           |           |
|---|-----------|-----------|-----------|
| H | 0.286111  | -3.270945 | -0.002240 |
| H | -3.192574 | 1.712657  | -0.004647 |
| H | 0.048704  | 4.554287  | -0.006762 |
| H | 1.637904  | 2.619361  | -0.002459 |
| N | -0.421615 | -1.325243 | -0.000100 |
| N | 0.145486  | 1.189254  | -0.000378 |
| C | -4.384008 | -2.984024 | 0.004907  |
| H | -4.572799 | -3.519342 | 0.950883  |
| H | -5.158903 | -2.212532 | -0.110598 |
| H | -4.502283 | -3.724731 | -0.802576 |
| C | -2.690442 | 4.405572  | 0.004587  |
| H | -2.476755 | 5.120304  | -0.806635 |
| H | -3.724749 | 4.049241  | -0.105316 |
| H | -2.622306 | 4.973132  | 0.948067  |

1g<sup>1</sup>-s

Geometry with 20 atoms:

Thermal correction to Gibbs Free Energy: 0.101193

Total energy: -4575.704207320

|    |           |           |           |
|----|-----------|-----------|-----------|
| Ni | -0.828276 | -0.181625 | -0.000015 |
| N  | 0.551735  | 1.299769  | 0.000086  |
| C  | 1.747124  | 0.831735  | 0.000058  |
| C  | 0.677451  | 2.752841  | 0.000035  |
| C  | 2.194846  | 2.995522  | 0.000056  |
| H  | 0.176550  | 3.174795  | -0.886152 |
| H  | 2.560175  | 3.521637  | -0.894010 |
| N  | 0.797358  | -1.304437 | -0.000019 |
| C  | 1.196607  | -2.709000 | 0.000041  |
| C  | 1.885122  | -0.618413 | 0.000056  |
| C  | 2.732148  | -2.660082 | 0.000114  |
| H  | 0.784023  | -3.216957 | 0.886395  |
| H  | 3.189673  | -3.108325 | -0.893941 |
| O  | 2.773183  | 1.662465  | 0.000018  |
| O  | 3.048596  | -1.242766 | 0.000143  |
| H  | 0.176520  | 3.174872  | 0.886168  |
| H  | 2.560153  | 3.521572  | 0.894169  |
| H  | 0.784113  | -3.217017 | -0.886320 |
| H  | 3.189593  | -3.108345 | 0.894200  |
| Br | -3.109907 | -0.072493 | -0.000115 |

1h<sup>1</sup>-s

Geometry with 31 atoms:

Thermal correction to Gibbs Free Energy: 0.180881

Total energy: -4824.664297970

|   |           |          |          |
|---|-----------|----------|----------|
| C | -1.206273 | 3.359862 | 0.126447 |
| C | -1.175309 | 1.970919 | 0.198339 |
| N | 0.000326  | 1.308563 | 0.369796 |
| C | 1.176249  | 1.970429 | 0.198326 |
| C | 1.207790  | 3.359369 | 0.126421 |

|    |           |           |           |
|----|-----------|-----------|-----------|
| C  | 0.000911  | 4.066750  | 0.137709  |
| C  | -2.316767 | 1.086251  | -0.003916 |
| C  | 2.317354  | 1.085324  | -0.003905 |
| C  | 3.657924  | 1.470568  | 0.135194  |
| C  | 4.657218  | 0.550253  | -0.131883 |
| C  | 4.305797  | -0.749675 | -0.522094 |
| C  | 2.962282  | -1.069515 | -0.617309 |
| N  | -1.986416 | -0.181045 | -0.379444 |
| N  | 1.986536  | -0.181837 | -0.379563 |
| C  | -2.962487 | -1.068307 | -0.617349 |
| C  | -4.305892 | -0.747928 | -0.522238 |
| C  | -4.656826 | 0.552111  | -0.131994 |
| C  | -3.657180 | 1.472023  | 0.135171  |
| Ni | 0.000173  | -0.634332 | 0.027103  |
| H  | -2.157340 | 3.886591  | 0.011860  |
| H  | 2.159076  | 3.885698  | 0.011808  |
| H  | 0.001134  | 5.156872  | 0.068639  |
| H  | 3.902655  | 2.483188  | 0.465547  |
| H  | 5.707788  | 0.833667  | -0.028780 |
| H  | 5.065427  | -1.501657 | -0.744934 |
| H  | 2.632399  | -2.078047 | -0.892467 |
| H  | -2.632975 | -2.076963 | -0.892505 |
| H  | -5.065804 | -1.499592 | -0.745190 |
| H  | -5.707291 | 0.835943  | -0.028977 |
| H  | -3.901526 | 2.484738  | 0.465519  |
| Br | -0.001151 | -3.003415 | 0.378102  |

2

Geometry with 15 atoms:

Thermal correction to Gibbs Free Energy: 0.082834

Total energy: -2844.909792210

|    |           |           |           |
|----|-----------|-----------|-----------|
| C  | -1.735503 | 1.200458  | -0.010693 |
| C  | -0.342715 | 1.211538  | -0.004830 |
| C  | 0.344721  | 0.000094  | -0.000710 |
| C  | -0.342908 | -1.211354 | -0.004823 |
| C  | -1.735583 | -1.200084 | -0.010712 |
| C  | -2.456559 | 0.000273  | -0.010393 |
| H  | -2.277236 | 2.152729  | -0.017826 |
| H  | 0.203053  | 2.159524  | -0.006857 |
| H  | 0.202793  | -2.159382 | -0.006841 |
| H  | -2.277508 | -2.152261 | -0.017862 |
| Br | 2.243922  | -0.000084 | 0.003343  |
| C  | -3.952132 | -0.000198 | 0.014814  |
| H  | -4.331359 | -0.012504 | 1.051931  |
| H  | -4.366701 | 0.898485  | -0.467597 |
| H  | -4.366238 | -0.887997 | -0.487880 |

CP-1a-t

Geometry with 36 atoms:

Thermal correction to Gibbs Free Energy: 0.222718

Total energy: -4848.432399570

|    |           |           |           |
|----|-----------|-----------|-----------|
| C  | 2.263184  | 1.082397  | -0.983275 |
| C  | 2.163073  | -0.101310 | -0.214716 |
| C  | 1.966306  | -0.023379 | 1.185419  |
| C  | 1.840107  | 1.252615  | 1.783327  |
| C  | 1.933872  | 2.426708  | 1.034037  |
| C  | 2.152109  | 2.317148  | -0.356564 |
| Br | 2.572668  | -1.770250 | -1.031800 |
| H  | 2.003819  | -0.921052 | 1.810532  |
| H  | 2.438319  | 1.020668  | -2.061051 |
| H  | 2.221565  | 3.228845  | -0.959704 |
| H  | 1.688081  | 1.313166  | 2.865892  |
| C  | -2.296478 | -1.018946 | 0.207503  |
| C  | -0.631813 | -2.513385 | 0.923030  |
| C  | -1.535516 | -3.542493 | 1.110085  |
| C  | -2.900242 | -3.281394 | 0.827804  |
| C  | -3.273036 | -2.035923 | 0.382857  |
| C  | -2.573772 | 0.305739  | -0.247590 |
| C  | -1.651844 | 2.410103  | -0.765916 |
| C  | -2.878802 | 2.940901  | -1.110516 |
| C  | -4.015351 | 2.095138  | -1.015132 |
| C  | -3.861558 | 0.797391  | -0.591298 |
| H  | 0.435243  | -2.672619 | 1.129114  |
| H  | -1.196688 | -4.518946 | 1.463862  |
| H  | -4.322740 | -1.821855 | 0.162784  |
| H  | -0.740401 | 3.021029  | -0.828545 |
| H  | -2.958940 | 3.976973  | -1.447319 |
| H  | -4.729969 | 0.136701  | -0.517133 |
| N  | -0.970343 | -1.292437 | 0.491702  |
| N  | -1.480236 | 1.148207  | -0.346183 |
| Ni | 0.180571  | 0.289588  | 0.190759  |
| C  | 1.760108  | 3.770034  | 1.662023  |
| H  | -5.008318 | 2.471596  | -1.279112 |
| H  | -3.653339 | -4.063813 | 0.962619  |
| H  | 2.519858  | 4.482893  | 1.302996  |
| H  | 0.775893  | 4.199358  | 1.402499  |
| H  | 1.820204  | 3.718898  | 2.759228  |

CP-1b-t

Geometry with 60 atoms:

Thermal correction to Gibbs Free Energy: 0.42949

Total energy: -5162.811080990

|   |           |           |           |
|---|-----------|-----------|-----------|
| C | -3.260596 | -0.807852 | 1.161395  |
| C | -3.301839 | -0.961670 | -0.248308 |
| C | -3.779876 | 0.089235  | -1.066028 |
| C | -4.196215 | 1.266196  | -0.479370 |
| C | -4.160509 | 1.454151  | 0.923679  |
| C | -3.687718 | 0.420684  | 1.717385  |

|    |           |           |           |
|----|-----------|-----------|-----------|
| Br | -3.112919 | -2.717398 | -1.009142 |
| H  | -3.829778 | -0.042755 | -2.150884 |
| H  | -3.084518 | -1.669468 | 1.816688  |
| H  | -3.672903 | 0.537457  | 2.806317  |
| H  | -4.561450 | 2.080393  | -1.115191 |
| C  | 1.423704  | -0.499101 | 0.149992  |
| C  | 0.714609  | -2.711448 | 0.434423  |
| C  | 2.006561  | -3.197988 | 0.424698  |
| C  | 3.088249  | -2.285140 | 0.265002  |
| C  | 2.767302  | -0.947293 | 0.131029  |
| C  | 1.005967  | 0.862052  | 0.027171  |
| C  | -0.806201 | 2.333027  | -0.027699 |
| C  | 0.008540  | 3.432648  | -0.184484 |
| C  | 1.424697  | 3.252457  | -0.242824 |
| C  | 1.891803  | 1.959936  | -0.135469 |
| H  | -0.131357 | -3.400661 | 0.556453  |
| H  | 2.167025  | -4.271302 | 0.539227  |
| H  | 3.563354  | -0.206978 | 0.005173  |
| H  | -1.894891 | 2.461229  | 0.014210  |
| H  | -0.444926 | 4.424526  | -0.263672 |
| H  | 2.964220  | 1.755563  | -0.173736 |
| N  | 0.401637  | -1.416252 | 0.300571  |
| N  | -0.359346 | 1.072289  | 0.079229  |
| Ni | -1.370366 | -0.617613 | 0.286307  |
| C  | -4.601169 | 2.756795  | 1.507507  |
| C  | 2.331672  | 4.462590  | -0.416466 |
| C  | 4.547064  | -2.735575 | 0.227787  |
| C  | 5.334618  | -2.018304 | 1.327113  |
| H  | 6.388816  | -2.346645 | 1.319928  |
| H  | 5.328700  | -0.923774 | 1.196373  |
| H  | 4.918547  | -2.241930 | 2.324907  |
| C  | 4.685754  | -4.239186 | 0.442870  |
| H  | 4.171441  | -4.819679 | -0.341619 |
| H  | 5.751504  | -4.522389 | 0.415501  |
| H  | 4.285069  | -4.555745 | 1.420959  |
| C  | 5.145503  | -2.386245 | -1.137635 |
| H  | 6.198271  | -2.715229 | -1.192340 |
| H  | 4.593010  | -2.885625 | -1.952582 |
| H  | 5.124402  | -1.301035 | -1.331584 |
| C  | 3.805783  | 4.078366  | -0.460262 |
| H  | 4.423855  | 4.982841  | -0.588921 |
| H  | 4.132486  | 3.585616  | 0.471287  |
| H  | 4.031574  | 3.401859  | -1.302073 |
| C  | 2.115713  | 5.423318  | 0.756508  |
| H  | 2.364011  | 4.938251  | 1.716665  |
| H  | 2.762591  | 6.311567  | 0.649303  |
| H  | 1.073507  | 5.777716  | 0.817187  |
| C  | 1.976398  | 5.171823  | -1.726580 |
| H  | 2.122399  | 4.501923  | -2.591901 |

|   |           |          |           |
|---|-----------|----------|-----------|
| H | 0.929916  | 5.518467 | -1.741204 |
| H | 2.621008  | 6.056400 | -1.871292 |
| H | -3.918068 | 3.572689 | 1.211266  |
| H | -5.602884 | 3.041344 | 1.144953  |
| H | -4.627445 | 2.724347 | 2.606786  |

|   |           |           |           |
|---|-----------|-----------|-----------|
| H | -6.100233 | -2.583480 | -0.589374 |
| H | -5.779187 | -2.787610 | 1.166722  |
| H | 4.042374  | 2.771529  | 0.903628  |
| H | 5.498492  | 1.800930  | 1.156733  |
| H | 5.029512  | 2.283904  | -0.497551 |

#### CP-1c-t

Geometry with 44 atoms:

Thermal correction to Gibbs Free Energy: 0.279603

|               |                 |           |           |
|---------------|-----------------|-----------|-----------|
| Total energy: | -5077.449145890 |           |           |
| C             | 2.671419        | -0.970165 | -1.009327 |
| C             | 2.213504        | -1.598348 | 0.178126  |
| C             | 2.561849        | -1.074892 | 1.446587  |
| C             | 3.328629        | 0.068509  | 1.513798  |
| C             | 3.822030        | 0.706568  | 0.349503  |
| C             | 3.493874        | 0.172951  | -0.886729 |
| Br            | 1.540431        | -3.404043 | 0.069524  |
| H             | 2.221116        | -1.576395 | 2.357241  |
| H             | 2.583066        | -1.470848 | -1.980006 |
| H             | 3.884745        | 0.639715  | -1.797769 |
| H             | 3.577316        | 0.488652  | 2.494577  |
| C             | -1.987205       | 0.296530  | -0.080849 |
| C             | -2.006895       | -2.030480 | -0.352085 |
| C             | -3.368356       | -2.131797 | -0.120432 |
| C             | -4.073877       | -0.928210 | 0.152705  |
| C             | -3.385041       | 0.269798  | 0.170864  |
| C             | -1.190073       | 1.475481  | -0.109373 |
| C             | 0.934668        | 2.369268  | -0.494186 |
| C             | 0.511685        | 3.677216  | -0.317244 |
| C             | -0.857017       | 3.881596  | 0.001824  |
| C             | -1.695962       | 2.787168  | 0.094326  |
| H             | -1.429687       | -2.940281 | -0.562367 |
| H             | -3.852650       | -3.108508 | -0.150847 |
| H             | -3.939174       | 1.188102  | 0.383021  |
| H             | 1.984234        | 2.182238  | -0.750260 |
| H             | 1.223995        | 4.495524  | -0.431201 |
| H             | -2.752229       | 2.955157  | 0.320673  |
| N             | -1.317927       | -0.889073 | -0.342680 |
| N             | 0.159164        | 1.291745  | -0.380067 |
| Ni            | 0.613719        | -0.641647 | -0.512078 |
| C             | 4.643009        | 1.948290  | 0.476626  |
| O             | -1.397438       | 5.093801  | 0.211825  |
| O             | -5.394250       | -0.883920 | 0.398788  |
| C             | -0.577041       | 6.232676  | 0.117153  |
| H             | -1.211767       | 7.103442  | 0.330477  |
| H             | 0.246427        | 6.211328  | 0.852665  |
| H             | -0.149394       | 6.351070  | -0.894158 |
| C             | -6.131974       | -2.081849 | 0.393989  |
| H             | -7.174670       | -1.816450 | 0.615325  |

#### CP-1d-t

Geometry with 42 atoms:

Thermal correction to Gibbs Free Energy: 0.275518

|               |                 |           |           |
|---------------|-----------------|-----------|-----------|
| Total energy: | -4927.036102150 |           |           |
| C             | 2.528923        | 0.320140  | 0.125875  |
| C             | 2.082727        | -1.765194 | 1.128729  |
| C             | 3.418003        | -2.134438 | 1.037390  |
| C             | 4.337573        | -1.253890 | 0.423402  |
| C             | 3.896365        | -0.030969 | -0.015401 |
| C             | 2.017456        | 1.613168  | -0.202241 |
| C             | 0.113868        | 3.019223  | -0.165688 |
| C             | 0.857478        | 4.106468  | -0.599232 |
| C             | 2.233759        | 3.923792  | -0.876948 |
| C             | 2.807596        | 2.691794  | -0.678317 |
| H             | 3.738971        | -3.097586 | 1.443297  |
| H             | 4.595438        | 0.678785  | -0.464921 |
| H             | 0.374241        | 5.079122  | -0.724780 |
| H             | 3.873086        | 2.544963  | -0.871997 |
| N             | 1.621879        | -0.588893 | 0.647557  |
| N             | 0.666126        | 1.801020  | 0.017312  |
| Ni            | -0.256197       | 0.117162  | 0.383777  |
| H             | -2.889390       | -0.408739 | 2.599631  |
| C             | -2.755784       | -0.342690 | 1.514445  |
| C             | -1.808292       | -1.198803 | 0.899379  |
| C             | -3.544463       | 0.528428  | 0.778563  |
| C             | -1.638256       | -1.124175 | -0.507374 |
| H             | -1.373074       | -2.013612 | 1.481256  |
| C             | -3.382478       | 0.550058  | -0.627523 |
| C             | -2.456626       | -0.247541 | -1.265806 |
| H             | -4.007430       | 1.224955  | -1.223319 |
| H             | -2.358138       | -0.221430 | -2.355001 |
| Br            | -0.730628       | -2.508422 | -1.469416 |
| C             | -4.541391       | 1.434380  | 1.422892  |
| H             | -4.295104       | 2.493541  | 1.230318  |
| H             | -5.552829       | 1.271276  | 1.013818  |
| H             | -4.583874       | 1.288171  | 2.512408  |
| H             | 2.839952        | 4.761112  | -1.236056 |
| H             | 5.390111        | -1.534059 | 0.318722  |
| C             | -1.345450       | 3.136038  | 0.110209  |
| H             | -1.930741       | 2.675824  | -0.705212 |
| H             | -1.607396       | 2.594277  | 1.035480  |
| H             | -1.662556       | 4.184939  | 0.203168  |
| C             | 1.113812        | -2.679709 | 1.802601  |

H 0.519642 -2.135683 2.555281  
H 0.411574 -3.129266 1.080609  
H 1.638063 -3.503723 2.307307

CP-1e-t

Geometry with 38 atoms:

Thermal correction to Gibbs Free Energy: 0.235063

Total energy: -4924.630352560

C -2.332527 -0.154274 1.188608  
C -2.411596 -0.492569 -0.186927  
C -2.777335 0.484681 -1.141753  
C -3.046191 1.771100 -0.722375  
C -2.970945 2.142592 0.641990  
C -2.608935 1.179034 1.570582  
Br -2.425385 -2.346474 -0.698553  
H -2.857369 0.212969 -2.198346  
H -2.247058 -0.933015 1.956026  
H -2.566824 1.439786 2.633521  
H -3.324341 2.528123 -1.464086  
C 2.317666 -0.467802 0.145856  
C 1.480722 -2.578314 0.682064  
C 2.754054 -3.126204 0.720100  
C 3.866341 -2.299656 0.456708  
C 3.658266 -0.953348 0.165728  
C 2.038476 0.879682 -0.135462  
C 0.437023 2.547066 -0.396682  
C 1.405590 3.500976 -0.677800  
C 2.761783 3.121777 -0.685909  
C 3.094676 1.797236 -0.412989  
H 2.878986 -4.186529 0.952831  
H 1.102590 4.529562 -0.888207  
N 1.237931 -1.289309 0.403319  
N 0.710171 1.263453 -0.127127  
Ni -0.446975 -0.306753 0.295460  
C -3.259002 3.553015 1.041692  
H 3.552963 3.847238 -0.901730  
H 4.885662 -2.698804 0.478747  
C 4.442248 1.292696 -0.391634  
C 4.710644 -0.013283 -0.116580  
H 5.743504 -0.377947 -0.104046  
H 5.256176 1.994485 -0.603900  
H -0.622674 2.829080 -0.388980  
H 0.601674 -3.202754 0.885531  
H -2.513243 4.245847 0.613337  
H -4.242216 3.882956 0.666715  
H -3.246519 3.679231 2.134424

CP-1f-t

Geometry with 42 atoms:

Thermal correction to Gibbs Free Energy: 0.271127

Total energy: -4927.032859490

C -2.337292 -0.490826 1.193831  
C -2.427507 -0.711948 -0.204491  
C -2.920116 0.304740 -1.055661  
C -3.301080 1.514927 -0.513517  
C -3.213433 1.770680 0.876114  
C -2.727832 0.769412 1.703276  
Br -2.280138 -2.502759 -0.885695  
H -3.009435 0.121110 -2.130410  
H -2.146619 -1.321859 1.883862  
H -2.673494 0.938739 2.784002  
H -3.678411 2.302029 -1.175855  
C 2.318088 -0.278211 0.119826  
C 1.575253 -2.456931 0.577203  
C 2.858804 -2.955980 0.620887  
C 3.950517 -2.064403 0.400199  
C 3.660468 -0.739815 0.153756  
C 1.918334 1.071503 -0.121403  
C 0.115754 2.549673 -0.327646  
C 0.941615 3.626457 -0.571200  
C 2.351783 3.422477 -0.591437  
C 2.815089 2.144249 -0.367036  
H 0.715250 -3.118848 0.745116  
H 3.034412 -4.017064 0.821771  
H 4.478893 -0.032807 -0.017772  
H -0.973084 2.684866 -0.313165  
H 0.516167 4.619198 -0.746652  
H 3.893124 1.952437 -0.377391  
N 1.285057 -1.169408 0.334062  
N 0.554971 1.302074 -0.103116  
Ni -0.474905 -0.350293 0.261595  
C 3.268837 4.570437 -0.850599  
H 4.326044 4.264895 -0.840420  
H 3.055114 5.036827 -1.828333  
H 3.133567 5.365140 -0.096026  
C 5.350311 -2.579058 0.441410  
H 6.088436 -1.783276 0.259584  
H 5.575452 -3.040221 1.419108  
H 5.504850 -3.370300 -0.313164  
C -3.610695 3.108464 1.409360  
H -2.911642 3.891601 1.065515  
H -4.611075 3.403360 1.051715  
H -3.616945 3.125181 2.509318

CP-1g-t

Geometry with 34 atoms:

Thermal correction to Gibbs Free Energy: 0.20963

Total energy: -4846.484803790

|    |           |           |           |
|----|-----------|-----------|-----------|
| C  | -1.878725 | -0.132461 | 1.195615  |
| C  | -1.879555 | -0.665558 | -0.122111 |
| C  | -2.254603 | 0.146083  | -1.220742 |
| C  | -2.593756 | 1.463755  | -1.000787 |
| C  | -2.608974 | 2.025416  | 0.301410  |
| C  | -2.255096 | 1.222062  | 1.371491  |
| Br | -1.787335 | -2.577818 | -0.353867 |
| H  | -2.272116 | -0.275384 | -2.230290 |
| H  | -1.810896 | -0.791540 | 2.069018  |
| H  | -2.287834 | 1.629600  | 2.388005  |
| H  | -2.866889 | 2.095187  | -1.853906 |
| C  | -3.008345 | 3.453692  | 0.486208  |
| H  | -2.391677 | 4.125661  | -0.135375 |
| H  | -4.054728 | 3.619894  | 0.176972  |
| H  | -2.910348 | 3.772561  | 1.534797  |
| Ni | 0.021314  | -0.318978 | 0.352794  |
| N  | 0.917988  | 1.413216  | -0.072888 |
| C  | 2.230805  | 1.209283  | -0.162512 |
| C  | 0.715743  | 2.842991  | -0.185534 |
| C  | 2.060441  | 3.345379  | -0.715986 |
| H  | -0.113039 | 3.095005  | -0.871520 |
| H  | 2.043753  | 3.477237  | -1.813776 |
| N  | 1.832075  | -1.052610 | 0.322079  |
| C  | 2.561208  | -2.304417 | 0.274472  |
| C  | 2.710713  | -0.095908 | 0.014051  |
| C  | 4.016966  | -1.847957 | 0.355099  |
| H  | 2.294255  | -2.981457 | 1.102894  |
| H  | 4.714037  | -2.433008 | -0.262213 |
| O  | 2.989494  | 2.301950  | -0.393085 |
| O  | 3.992437  | -0.496425 | -0.125994 |
| H  | 0.459374  | 3.295237  | 0.795931  |
| H  | 2.406496  | 4.284246  | -0.259092 |
| H  | 2.356054  | -2.854616 | -0.667689 |
| H  | 4.386649  | -1.846201 | 1.397618  |

CP-1h-t

Geometry with 45 atoms:

Thermal correction to Gibbs Free Energy: 0.286021

Total energy: -5095.455999250

|   |           |          |           |
|---|-----------|----------|-----------|
| C | 1.356988  | 3.461376 | 0.312233  |
| C | 1.465867  | 2.148304 | -0.195779 |
| N | 0.340095  | 1.556517 | -0.685439 |
| C | -0.874670 | 2.112242 | -0.613514 |
| C | -1.045496 | 3.392307 | -0.109475 |
| C | 0.114202  | 4.073525 | 0.343112  |
| C | 2.608244  | 1.280132 | -0.228625 |
| C | -1.924604 | 1.182056 | -1.076916 |
| C | -3.278278 | 1.511032 | -1.151612 |
| C | -4.192835 | 0.558933 | -1.585530 |

|    |           |           |           |
|----|-----------|-----------|-----------|
| C  | -3.727767 | -0.708600 | -1.940515 |
| C  | -2.368027 | -0.967280 | -1.840933 |
| N  | 2.359358  | -0.014132 | -0.684622 |
| N  | -1.476732 | -0.058568 | -1.422940 |
| C  | 3.385236  | -0.880914 | -0.720887 |
| C  | 4.677390  | -0.572732 | -0.340228 |
| C  | 4.943331  | 0.741316  | 0.119689  |
| C  | 3.912443  | 1.651378  | 0.172279  |
| Ni | 0.452095  | -0.312375 | -1.049632 |
| H  | 2.236467  | 3.985072  | 0.699427  |
| H  | -2.030582 | 3.860641  | -0.040896 |
| H  | 0.020964  | 5.086882  | 0.743363  |
| H  | -3.608023 | 2.513480  | -0.867067 |
| H  | -5.256550 | 0.801825  | -1.647460 |
| H  | -4.407693 | -1.489200 | -2.288341 |
| H  | -1.964738 | -1.953685 | -2.098576 |
| H  | 3.140087  | -1.889546 | -1.077941 |
| H  | 5.462531  | -1.329905 | -0.398396 |
| H  | 5.951744  | 1.029292  | 0.430142  |
| H  | 4.089296  | 2.672352  | 0.524598  |
| C  | -0.497918 | -1.830506 | 1.196088  |
| C  | 0.274985  | -0.803816 | 1.733638  |
| C  | -1.887333 | -1.805674 | 1.280348  |
| C  | -0.367392 | 0.280782  | 2.329759  |
| H  | 1.366403  | -0.849191 | 1.693224  |
| C  | -2.507558 | -0.705204 | 1.864792  |
| H  | -2.482377 | -2.620978 | 0.858653  |
| C  | -1.761913 | 0.363314  | 2.381756  |
| H  | 0.237657  | 1.100277  | 2.734137  |
| H  | -3.602176 | -0.665310 | 1.902275  |
| Br | 0.355346  | -3.249125 | 0.256879  |
| C  | -2.451417 | 1.554182  | 2.970427  |
| H  | -2.897364 | 1.320006  | 3.952105  |
| H  | -1.756794 | 2.396182  | 3.110023  |
| H  | -3.274574 | 1.894041  | 2.320016  |

CP'-1a-t

Geometry with 36 atoms:

Thermal correction to Gibbs Free Energy: 0.220298

Total energy: -4848.424182580

|    |           |           |           |
|----|-----------|-----------|-----------|
| Ni | -0.708703 | -0.861618 | -0.362519 |
| C  | 2.629346  | -0.623803 | -0.152021 |
| C  | 3.983774  | -0.867593 | -0.338698 |
| C  | 2.160801  | 0.328020  | 0.744331  |
| C  | 4.894294  | -0.123111 | 0.407753  |
| H  | 4.333464  | -1.618819 | -1.052987 |
| C  | 3.092671  | 1.057348  | 1.477982  |
| H  | 1.083644  | 0.499967  | 0.856139  |
| C  | 4.468523  | 0.844672  | 1.326615  |

|    |           |           |           |
|----|-----------|-----------|-----------|
| H  | 5.966543  | -0.299045 | 0.269422  |
| H  | 2.738638  | 1.814932  | 2.185287  |
| Br | 1.350335  | -1.629645 | -1.180926 |
| N  | -2.437922 | -0.947522 | 0.451741  |
| C  | -4.995803 | -0.723095 | 1.547476  |
| C  | -3.046849 | -2.009616 | 1.002411  |
| C  | -3.092311 | 0.273915  | 0.428651  |
| C  | -4.392586 | 0.378250  | 0.988353  |
| C  | -4.309078 | -1.964664 | 1.560333  |
| N  | -1.123821 | 1.023338  | -0.678765 |
| C  | -2.075098 | 3.637169  | -0.914095 |
| C  | -0.388090 | 1.972791  | -1.273298 |
| C  | -2.373565 | 1.348725  | -0.180051 |
| C  | -2.849292 | 2.680841  | -0.301355 |
| C  | -0.799083 | 3.282857  | -1.423096 |
| H  | -2.475764 | -2.946358 | 0.988380  |
| H  | -4.912620 | 1.340388  | 0.970214  |
| H  | -4.753118 | -2.863115 | 1.995251  |
| H  | 0.593503  | 1.654539  | -1.650802 |
| H  | -3.834081 | 2.942168  | 0.096279  |
| H  | -0.154220 | 4.012164  | -1.918806 |
| C  | 5.458287  | 1.613546  | 2.141715  |
| H  | -2.442586 | 4.663697  | -1.006736 |
| H  | -5.998482 | -0.640336 | 1.977693  |
| H  | 6.400251  | 1.770092  | 1.593746  |
| H  | 5.060853  | 2.594861  | 2.442638  |
| H  | 5.712494  | 1.069510  | 3.068347  |

#### CP<sup>1</sup>-1b-t

Geometry with 60 atoms:

Thermal correction to Gibbs Free Energy: 0.426206

Total energy: -5162.802371720

|    |           |           |           |
|----|-----------|-----------|-----------|
| Ni | 0.704716  | -1.255114 | -0.834557 |
| C  | 3.942127  | -0.896543 | -0.060533 |
| C  | 5.323532  | -1.037546 | -0.071416 |
| C  | 3.269695  | -0.232291 | 0.957252  |
| C  | 6.048454  | -0.486967 | 0.983506  |
| H  | 5.835741  | -1.561893 | -0.883605 |
| C  | 4.018445  | 0.307632  | 1.999291  |
| H  | 2.178109  | -0.133494 | 0.925627  |
| C  | 5.413592  | 0.188781  | 2.033223  |
| H  | 7.139347  | -0.585025 | 0.988243  |
| H  | 3.502888  | 0.838672  | 2.806658  |
| Br | 2.914787  | -1.634225 | -1.513100 |
| N  | -1.089277 | -1.661591 | -0.310611 |
| C  | -3.800500 | -1.887389 | 0.462144  |
| C  | -1.665280 | -2.857106 | -0.131932 |
| C  | -1.853156 | -0.521959 | -0.109868 |
| C  | -3.210531 | -0.651411 | 0.277678  |

|   |           |           |           |
|---|-----------|-----------|-----------|
| C | -2.982871 | -3.033971 | 0.244505  |
| N | 0.147236  | 0.615366  | -0.712918 |
| C | -1.044693 | 3.159699  | -0.397458 |
| C | 0.836140  | 1.738791  | -0.936358 |
| C | -1.177223 | 0.719072  | -0.322946 |
| C | -1.762095 | 2.001262  | -0.166566 |
| C | 0.313705  | 3.011309  | -0.801156 |
| H | -1.020900 | -3.728589 | -0.303822 |
| H | -3.797543 | 0.259869  | 0.430592  |
| H | -3.364615 | -4.049043 | 0.366614  |
| H | 1.882987  | 1.608883  | -1.244951 |
| H | -2.809611 | 2.062776  | 0.145436  |
| H | 0.954803  | 3.869973  | -1.007642 |
| C | 6.202414  | 0.747773  | 3.173740  |
| H | 7.219952  | 1.030810  | 2.863418  |
| H | 5.711468  | 1.630340  | 3.611813  |
| H | 6.307279  | 0.003211  | 3.982388  |
| C | -5.266437 | -1.987985 | 0.879455  |
| C | -5.719334 | -3.436759 | 1.029277  |
| H | -5.141738 | -3.973571 | 1.800938  |
| H | -6.779750 | -3.466317 | 1.331879  |
| H | -5.631112 | -3.998290 | 0.083684  |
| C | -6.143942 | -1.316800 | -0.180494 |
| H | -7.209917 | -1.391465 | 0.098244  |
| H | -5.905581 | -0.246788 | -0.298129 |
| H | -6.017897 | -1.800719 | -1.164746 |
| C | -5.462165 | -1.281217 | 2.223300  |
| H | -4.836472 | -1.740551 | 3.008372  |
| H | -5.203311 | -0.210870 | 2.169253  |
| H | -6.515704 | -1.352893 | 2.546508  |
| C | -1.706255 | 4.524785  | -0.217985 |
| C | -2.902787 | 4.638046  | -1.166170 |
| H | -3.665725 | 3.868551  | -0.962906 |
| H | -3.387716 | 5.624369  | -1.058681 |
| H | -2.586865 | 4.530311  | -2.218508 |
| C | -2.187460 | 4.669870  | 1.228099  |
| H | -2.659263 | 5.656707  | 1.380053  |
| H | -2.931111 | 3.901228  | 1.495718  |
| H | -1.345358 | 4.585942  | 1.937084  |
| C | -0.744979 | 5.669858  | -0.520114 |
| H | 0.132363  | 5.661562  | 0.148826  |
| H | -0.381481 | 5.641916  | -1.561396 |
| H | -1.258969 | 6.635399  | -0.376998 |

#### CP<sup>1</sup>-1c-t

Geometry with 44 atoms:

Thermal correction to Gibbs Free Energy: 0.276206

Total energy: -5077.442294930

|    |           |           |           |
|----|-----------|-----------|-----------|
| Ni | -0.030805 | -1.014166 | -0.723936 |
|----|-----------|-----------|-----------|



|    |           |           |           |
|----|-----------|-----------|-----------|
| C  | 3.265514  | -0.916706 | -0.137060 |
| C  | 4.629175  | -1.161254 | -0.232634 |
| C  | 2.710063  | -0.196511 | 0.912894  |
| C  | 5.458282  | -0.660451 | 0.768602  |
| H  | 5.048338  | -1.727018 | -1.069949 |
| C  | 3.561626  | 0.292259  | 1.899932  |
| H  | 1.629388  | -0.014499 | 0.948636  |
| C  | 4.943181  | 0.068102  | 1.848314  |
| H  | 6.536950  | -0.840288 | 0.706588  |
| H  | 3.139145  | 0.866253  | 2.731601  |
| Br | 2.099274  | -1.588393 | -1.513640 |
| N  | -1.831946 | -1.266852 | -0.114357 |
| C  | -4.490403 | -1.267139 | 0.766528  |
| C  | -2.487327 | -2.406463 | 0.105826  |
| C  | -2.487637 | -0.060918 | 0.099471  |
| C  | -3.836043 | -0.069340 | 0.546039  |
| C  | -3.800875 | -2.489067 | 0.541293  |
| N  | -0.427606 | 0.902554  | -0.601985 |
| C  | -1.380639 | 3.516451  | -0.286379 |
| C  | 0.340417  | 1.955242  | -0.871390 |
| C  | -1.725201 | 1.113702  | -0.159823 |
| C  | -2.202847 | 2.442321  | 0.000576  |
| C  | -0.055962 | 3.278011  | -0.742232 |
| H  | -1.921906 | -3.328454 | -0.079662 |
| H  | -4.377909 | 0.864149  | 0.721553  |
| H  | -4.260558 | -3.465747 | 0.697381  |
| H  | 1.359540  | 1.733738  | -1.218248 |
| H  | -3.219741 | 2.639598  | 0.351108  |
| H  | 0.640537  | 4.080764  | -0.987440 |
| C  | 5.842846  | 0.572521  | 2.930710  |
| H  | 6.851736  | 0.793430  | 2.549634  |
| H  | 5.439549  | 1.481786  | 3.402152  |
| H  | 5.958362  | -0.180880 | 3.729666  |
| O  | -5.765482 | -1.203887 | 1.188564  |
| O  | -1.893102 | 4.747433  | -0.112831 |
| C  | -1.088793 | 5.867337  | -0.389584 |
| H  | -1.695522 | 6.758152  | -0.177352 |
| H  | -0.187920 | 5.897679  | 0.248719  |
| H  | -0.776797 | 5.901297  | -1.448502 |
| C  | -6.470197 | -2.399538 | 1.415623  |
| H  | -6.000834 | -3.013414 | 2.204705  |
| H  | -7.478989 | -2.118746 | 1.747590  |
| H  | -6.560959 | -3.007017 | 0.497726  |

CP<sup>1</sup>-1d-t

Geometry with 42 atoms:

Thermal correction to Gibbs Free Energy: 0.272565

Total energy: -4927.034830420

|    |           |          |           |
|----|-----------|----------|-----------|
| Ni | -0.565309 | 0.001353 | -0.877617 |
|----|-----------|----------|-----------|

|    |           |           |           |
|----|-----------|-----------|-----------|
| C  | 2.702872  | -0.012858 | -0.344727 |
| C  | 4.085147  | 0.027344  | -0.476786 |
| C  | 2.080802  | -0.058096 | 0.898275  |
| C  | 4.860764  | 0.025260  | 0.680726  |
| H  | 4.554528  | 0.056988  | -1.463930 |
| C  | 2.879176  | -0.059142 | 2.038479  |
| H  | 0.984462  | -0.096144 | 0.963170  |
| C  | 4.276152  | -0.013673 | 1.952607  |
| H  | 5.951783  | 0.052633  | 0.590984  |
| H  | 2.401357  | -0.099096 | 3.023107  |
| Br | 1.614157  | -0.011974 | -1.926689 |
| N  | -1.748693 | -1.300151 | -0.070569 |
| C  | -3.685009 | -2.881999 | 1.156290  |
| C  | -1.640673 | -2.644085 | -0.100372 |
| C  | -2.810406 | -0.703994 | 0.585019  |
| C  | -3.797654 | -1.512362 | 1.201186  |
| C  | -2.578565 | -3.471915 | 0.495640  |
| N  | -1.737646 | 1.311112  | -0.073416 |
| C  | -3.658913 | 2.913588  | 1.148480  |
| C  | -1.615652 | 2.653645  | -0.105083 |
| C  | -2.804521 | 0.726084  | 0.583104  |
| C  | -3.784741 | 1.545143  | 1.196439  |
| C  | -2.545998 | 3.491766  | 0.488313  |
| H  | -4.643008 | -1.043705 | 1.712526  |
| H  | -2.456017 | -4.557167 | 0.449212  |
| H  | -4.635070 | 1.085847  | 1.707999  |
| H  | -2.412613 | 4.575682  | 0.440591  |
| C  | 5.119825  | 0.016376  | 3.188420  |
| H  | 5.279373  | 1.053026  | 3.531588  |
| H  | 4.641764  | -0.526440 | 4.017709  |
| H  | 6.113613  | -0.421603 | 3.011919  |
| C  | -0.440228 | -3.178640 | -0.809650 |
| H  | -0.416124 | -2.815758 | -1.851804 |
| H  | 0.482713  | -2.809563 | -0.328443 |
| H  | -0.415674 | -4.277451 | -0.817731 |
| C  | -0.407715 | 3.173305  | -0.812701 |
| H  | 0.509224  | 2.793409  | -0.328014 |
| H  | -0.385969 | 2.807833  | -1.854048 |
| H  | -0.370135 | 4.271734  | -0.822738 |
| H  | -4.443078 | -3.512116 | 1.630682  |
| H  | -4.411597 | 3.551881  | 1.620528  |

CP<sup>1</sup>-1e-t

Geometry with 38 atoms:

Thermal correction to Gibbs Free Energy: 0.232195

Total energy: -4924.623427400

|    |           |           |           |
|----|-----------|-----------|-----------|
| Ni | -0.319348 | -1.114725 | -0.328419 |
| C  | 2.971783  | -0.491573 | -0.097015 |
| C  | 4.347186  | -0.583426 | -0.266928 |

|    |           |           |           |
|----|-----------|-----------|-----------|
| C  | 2.387453  | 0.440284  | 0.751090  |
| C  | 5.157812  | 0.296844  | 0.446372  |
| H  | 4.788507  | -1.321235 | -0.943613 |
| C  | 3.221076  | 1.307609  | 1.452063  |
| H  | 1.296885  | 0.490524  | 0.851367  |
| C  | 4.613741  | 1.250485  | 1.316161  |
| H  | 6.244421  | 0.241233  | 0.320399  |
| H  | 2.774724  | 2.051136  | 2.121065  |
| Br | 1.829362  | -1.688457 | -1.080399 |
| N  | -2.069174 | -1.314662 | 0.442512  |
| C  | -4.703657 | -1.101053 | 1.425507  |
| C  | -2.674044 | -2.349174 | 1.045248  |
| C  | -2.782170 | -0.133819 | 0.314686  |
| C  | -4.115297 | -0.001298 | 0.806136  |
| C  | -3.966927 | -2.298163 | 1.545223  |
| N  | -0.851470 | 0.728593  | -0.775811 |
| C  | -2.114892 | 3.221352  | -1.133384 |
| C  | -0.227996 | 1.742066  | -1.388226 |
| C  | -2.140204 | 0.941377  | -0.322666 |
| C  | -2.802492 | 2.194264  | -0.491820 |
| C  | -0.801366 | 2.990184  | -1.590738 |
| H  | -4.395173 | -3.181613 | 2.025146  |
| H  | -0.232112 | 3.771364  | -2.100430 |
| C  | 5.499027  | 2.167659  | 2.097464  |
| H  | -2.600795 | 4.192329  | -1.275629 |
| H  | -5.725818 | -1.024245 | 1.810580  |
| C  | -4.768103 | 1.269545  | 0.628103  |
| C  | -4.145060 | 2.312031  | 0.013225  |
| H  | -4.659490 | 3.271094  | -0.112252 |
| H  | -5.791124 | 1.377871  | 1.004844  |
| H  | -2.083895 | -3.269622 | 1.129783  |
| H  | 0.794114  | 1.542548  | -1.737890 |
| H  | 6.428027  | 2.395972  | 1.552658  |
| H  | 4.991391  | 3.114605  | 2.336748  |
| H  | 5.793703  | 1.707644  | 3.057050  |

CP<sup>1</sup>-1f-t

Geometry with 42 atoms:

Thermal correction to Gibbs Free Energy: 0.269681

Total energy: -4927.026375520

|    |           |           |           |
|----|-----------|-----------|-----------|
| Ni | -0.271158 | -0.960939 | -0.554968 |
| C  | 3.043255  | -0.620468 | -0.156480 |
| C  | 4.410917  | -0.821258 | -0.285916 |
| C  | 2.500301  | 0.196587  | 0.827322  |
| C  | 5.258018  | -0.173635 | 0.611089  |
| H  | 4.819575  | -1.465729 | -1.069913 |
| C  | 3.369332  | 0.831412  | 1.710039  |
| H  | 1.414856  | 0.338347  | 0.891996  |
| C  | 4.756437  | 0.656713  | 1.621059  |

|    |           |           |           |
|----|-----------|-----------|-----------|
| H  | 6.340012  | -0.317654 | 0.520425  |
| H  | 2.956964  | 1.483062  | 2.487897  |
| Br | 1.850945  | -1.494879 | -1.389827 |
| N  | -2.025618 | -1.265284 | 0.148216  |
| C  | -4.669399 | -1.345195 | 1.113947  |
| C  | -2.593101 | -2.423754 | 0.517278  |
| C  | -2.762012 | -0.096902 | 0.249549  |
| C  | -4.095076 | -0.150342 | 0.737373  |
| C  | -3.881594 | -2.528017 | 0.998116  |
| N  | -0.799217 | 0.921608  | -0.625897 |
| C  | -1.936440 | 3.495839  | -0.552800 |
| C  | -0.110392 | 1.994047  | -1.037615 |
| C  | -2.090726 | 1.094933  | -0.162855 |
| C  | -2.654793 | 2.398853  | -0.128155 |
| C  | -0.609632 | 3.280196  | -1.028313 |
| H  | -1.963655 | -3.316873 | 0.415652  |
| H  | -4.677215 | 0.774067  | 0.813456  |
| H  | -4.288730 | -3.502426 | 1.284562  |
| H  | 0.910140  | 1.800953  | -1.396806 |
| H  | -3.675827 | 2.535487  | 0.243725  |
| H  | 0.003044  | 4.116023  | -1.379447 |
| C  | -2.501905 | 4.876629  | -0.527077 |
| H  | -3.531871 | 4.894269  | -0.139656 |
| H  | -1.887446 | 5.546293  | 0.100074  |
| H  | -2.507192 | 5.322573  | -1.537230 |
| C  | -6.067339 | -1.429805 | 1.629129  |
| H  | -6.555402 | -0.443944 | 1.663886  |
| H  | -6.683485 | -2.096100 | 1.000050  |
| H  | -6.090821 | -1.860507 | 2.645661  |
| C  | 5.674668  | 1.322043  | 2.595578  |
| H  | 6.678190  | 1.473558  | 2.169648  |
| H  | 5.281337  | 2.297478  | 2.921158  |
| H  | 5.797605  | 0.706652  | 3.504085  |

CP<sup>1</sup>-1g-t

Geometry with 34 atoms:

Thermal correction to Gibbs Free Energy: 0.208037

Total energy: -4846.475454850

|    |           |           |           |
|----|-----------|-----------|-----------|
| Ni | -0.911226 | -1.008508 | -0.061457 |
| N  | -2.681615 | -0.721294 | 0.667994  |
| C  | -3.097416 | 0.497430  | 0.309442  |
| C  | -3.819620 | -1.366045 | 1.293541  |
| C  | -4.742689 | -0.191053 | 1.619527  |
| H  | -4.307966 | -2.086562 | 0.605027  |
| H  | -5.813940 | -0.402691 | 1.490914  |
| N  | -1.051530 | 0.843362  | -0.797627 |
| C  | -0.348072 | 1.947642  | -1.415874 |
| C  | -2.238218 | 1.322322  | -0.425351 |
| C  | -1.469977 | 2.942442  | -1.720907 |

|    |           |           |           |
|----|-----------|-----------|-----------|
| H  | 0.408206  | 2.386193  | -0.729374 |
| H  | -1.857744 | 2.815471  | -2.749189 |
| O  | -4.356039 | 0.827805  | 0.692661  |
| O  | -2.504674 | 2.601734  | -0.791918 |
| H  | -3.540341 | -1.932935 | 2.197395  |
| H  | -4.579245 | 0.181532  | 2.648356  |
| H  | 0.197102  | 1.643470  | -2.326556 |
| H  | -1.196624 | 3.997927  | -1.578484 |
| Br | 1.143507  | -1.922624 | -0.732873 |
| C  | 2.421861  | -0.665398 | -0.047136 |
| C  | 3.771982  | -0.857240 | -0.315012 |
| C  | 1.965195  | 0.406610  | 0.709541  |
| C  | 4.685431  | 0.064232  | 0.192039  |
| H  | 4.110511  | -1.712444 | -0.906742 |
| C  | 2.898938  | 1.312977  | 1.205765  |
| H  | 0.890031  | 0.525453  | 0.889708  |
| C  | 4.268264  | 1.162620  | 0.954486  |
| H  | 5.752770  | -0.076525 | -0.008954 |
| H  | 2.552321  | 2.160720  | 1.806708  |
| C  | 5.258353  | 2.162197  | 1.465443  |
| H  | 4.905858  | 2.645946  | 2.388740  |
| H  | 6.235664  | 1.698050  | 1.666652  |
| H  | 5.428509  | 2.963262  | 0.725627  |

#### CP<sup>1</sup>-1h-t

Geometry with 45 atoms:

Thermal correction to Gibbs Free Energy: 0.286555

Total energy: -5095.454269000

|    |           |           |           |
|----|-----------|-----------|-----------|
| C  | -2.535205 | 3.074631  | -0.060110 |
| C  | -1.521185 | 2.171549  | -0.344207 |
| N  | -1.747165 | 0.855505  | -0.392485 |
| C  | -2.979553 | 0.307042  | -0.168014 |
| C  | -4.053740 | 1.182287  | 0.138625  |
| C  | -3.828161 | 2.542016  | 0.191651  |
| C  | -0.109563 | 2.514919  | -0.636227 |
| C  | -3.010246 | -1.118003 | -0.283811 |
| C  | -4.184322 | -1.908572 | -0.182397 |
| C  | -4.113965 | -3.273585 | -0.331408 |
| C  | -2.859914 | -3.881103 | -0.587632 |
| C  | -1.751213 | -3.055738 | -0.674322 |
| N  | 0.697802  | 1.460125  | -0.899032 |
| N  | -1.788361 | -1.727174 | -0.532803 |
| C  | 1.968527  | 1.684832  | -1.234772 |
| C  | 2.521420  | 2.959833  | -1.299068 |
| C  | 1.709144  | 4.046712  | -0.987059 |
| C  | 0.376426  | 3.822096  | -0.657975 |
| Ni | -0.234430 | -0.367603 | -0.398155 |
| H  | -2.358259 | 4.151699  | -0.029193 |
| H  | -5.053066 | 0.783990  | 0.337436  |

|    |           |           |           |
|----|-----------|-----------|-----------|
| H  | -4.652996 | 3.219349  | 0.429822  |
| H  | -5.145247 | -1.421375 | 0.008018  |
| H  | -5.019926 | -3.882164 | -0.255708 |
| H  | -2.757796 | -4.961286 | -0.711896 |
| H  | -0.760770 | -3.489416 | -0.871457 |
| H  | 2.577323  | 0.801829  | -1.459838 |
| H  | 3.568363  | 3.089856  | -1.580768 |
| H  | 2.106544  | 5.064677  | -1.008619 |
| H  | -0.286528 | 4.657483  | -0.422056 |
| Br | 3.824355  | -1.829881 | -0.399416 |
| C  | 2.514478  | -0.966972 | 0.673096  |
| C  | 2.843128  | 0.187427  | 1.353306  |
| C  | 1.214126  | -1.519294 | 0.726258  |
| C  | 1.856449  | 0.832689  | 2.127792  |
| H  | 3.851979  | 0.603827  | 1.284225  |
| C  | 0.247222  | -0.873803 | 1.540883  |
| H  | 1.047293  | -2.536164 | 0.353236  |
| C  | 0.575364  | 0.321653  | 2.242475  |
| H  | 2.115081  | 1.760374  | 2.650516  |
| H  | -0.670010 | -1.405008 | 1.826639  |
| C  | -0.486084 | 0.995455  | 3.048983  |
| H  | -1.336985 | 1.283718  | 2.403947  |
| H  | -0.895396 | 0.320060  | 3.819292  |
| H  | -0.112734 | 1.901666  | 3.548126  |

#### CP-1a<sup>1</sup>-s

Geometry with 37 atoms:

Thermal correction to Gibbs Free Energy: 0.221295

Total energy: -7422.571427760

|    |           |           |           |
|----|-----------|-----------|-----------|
| Ni | 0.488783  | -0.278419 | -0.559827 |
| C  | 0.908935  | -0.530902 | 1.473848  |
| C  | -1.547200 | -1.762230 | 2.081033  |
| C  | 0.660162  | -1.850078 | 1.031538  |
| C  | -0.048267 | 0.152850  | 2.260200  |
| C  | -1.260634 | -0.447845 | 2.524204  |
| C  | -0.574487 | -2.446475 | 1.367752  |
| H  | 1.463277  | -2.453633 | 0.599932  |
| H  | 0.173024  | 1.160708  | 2.627035  |
| H  | -2.017470 | 0.098491  | 3.098046  |
| H  | -0.764727 | -3.477539 | 1.049368  |
| N  | -1.504542 | -0.263225 | -0.850347 |
| C  | -4.262595 | -0.076843 | -0.934264 |
| C  | -2.244149 | -1.340231 | -1.115323 |
| C  | -2.099873 | 0.925647  | -0.649020 |
| C  | -3.490545 | 1.049984  | -0.674629 |
| C  | -3.631710 | -1.295677 | -1.173366 |
| N  | 0.135435  | 1.754082  | -0.521845 |
| C  | -0.653357 | 4.354115  | 0.038026  |
| C  | 1.042375  | 2.719579  | -0.366804 |

C -1.174963 2.056724 -0.426379  
C -1.602615 3.353975 -0.142236  
C 0.696274 4.036340 -0.083412  
H -1.693034 -2.271378 -1.289821  
H -3.968586 2.016050 -0.502412  
H -4.201818 -2.199760 -1.395739  
H 2.091738 2.419721 -0.467197  
H -2.666423 3.583971 -0.057824  
H 1.473928 4.792689 0.039727  
Br 1.709192 -1.354380 -2.342062  
Br 2.719098 0.119046 1.462728  
C -2.875777 -2.375255 2.391884  
H -0.968079 5.375105 0.266904  
H -5.352277 0.000078 -0.958746  
H -3.696984 -1.757797 1.987678  
H -2.970258 -3.384039 1.962505  
H -3.044113 -2.448328 3.479421

CP-1b<sup>1</sup>-s

Geometry with 61 atoms:

Thermal correction to Gibbs Free Energy: 0.432757

Total energy: -7736.956193040

Ni 1.411466 -0.785978 -0.631995  
C -0.560877 1.291180 -0.390996  
C -1.149895 2.524356 -0.135702  
C -0.365746 3.681251 -0.033885  
C 1.010627 3.522032 -0.214444  
C 1.530145 2.255278 -0.462342  
C -1.326419 0.034564 -0.552004  
C -2.703154 -0.057978 -0.382390  
C -3.366121 -1.276040 -0.584906  
C -2.582662 -2.351697 -1.009352  
C -1.206987 -2.191415 -1.132518  
H -2.234824 2.589094 -0.022175  
H 1.696509 4.369098 -0.165466  
H 2.606649 2.106330 -0.607095  
H -3.265711 0.825929 -0.072740  
H -3.016512 -3.329759 -1.223436  
H -0.572619 -3.033258 -1.431064  
N 0.772484 1.166016 -0.538259  
N -0.586757 -1.040767 -0.887570  
C -1.022682 5.023789 0.255829  
C -4.858174 -1.389994 -0.308934  
C -5.619586 -0.352717 -1.138884  
H -6.701337 -0.437073 -0.942347  
H -5.321594 0.680244 -0.898508  
H -5.456893 -0.512008 -2.218000  
C -5.082754 -1.131487 1.185598  
H -6.153554 -1.232337 1.429898

H -4.522690 -1.858151 1.799285  
H -4.764718 -0.119561 1.484373  
C -5.395104 -2.776407 -0.648670  
H -5.257240 -3.021992 -1.714904  
H -4.913434 -3.564846 -0.046250  
H -6.475626 -2.815554 -0.436463  
C -2.036103 5.334188 -0.850494  
H -2.836221 4.578984 -0.909242  
H -2.514367 6.309115 -0.658202  
H -1.543288 5.385304 -1.835860  
C -1.739095 4.940958 1.607771  
H -1.028040 4.710002 2.418680  
H -2.217659 5.907188 1.839367  
H -2.526016 4.169728 1.616041  
C -0.002717 6.155869 0.313227  
H 0.742964 5.999091 1.110320  
H 0.532489 6.277329 -0.643224  
H -0.518249 7.106196 0.526053  
Br 3.310046 -0.033634 1.683933  
C 1.762126 -1.138322 1.379761  
C 1.930135 -2.398564 0.751846  
C 0.613578 -0.886154 2.172904  
C 0.921646 -3.375267 0.932039  
H 2.902182 -2.690317 0.343397  
C -0.365277 -1.848145 2.277922  
H 0.511715 0.078091 2.681310  
C -0.227397 -3.118187 1.662016  
H 1.062206 -4.363847 0.480404  
H -1.269719 -1.633986 2.859421  
C -1.305555 -4.142057 1.830959  
H -1.117385 -5.037887 1.220102  
H -1.398427 -4.461853 2.882747  
H -2.289207 -3.732175 1.539581  
Br 3.145033 -0.997528 -2.308946

CP-1c<sup>1</sup>-s

Geometry with 45 atoms:

Thermal correction to Gibbs Free Energy: 0.281096

Total energy: -7651.598128220

Ni 0.484412 -0.916084 -0.632168  
C 0.616377 -1.549319 1.323986  
C -2.112872 -2.227021 1.560489  
C 0.099636 -2.654732 0.598876  
C -0.231314 -0.805143 2.185435  
C -1.566781 -1.125882 2.269583  
C -1.270094 -2.978069 0.758782  
H 0.776457 -3.379439 0.136079  
H 0.185884 0.024504 2.765251  
H -2.225158 -0.525200 2.907777

|    |           |           |           |
|----|-----------|-----------|-----------|
| H  | -1.666235 | -3.855322 | 0.234654  |
| N  | -1.329438 | 0.002905  | -0.793035 |
| C  | -3.734619 | 1.379530  | -0.491291 |
| C  | -2.495130 | -0.585395 | -1.051138 |
| C  | -1.329469 | 1.301962  | -0.423629 |
| C  | -2.505813 | 2.013488  | -0.253826 |
| C  | -3.724228 | 0.049737  | -0.927895 |
| N  | 1.044613  | 1.054574  | -0.436381 |
| C  | 1.520820  | 3.725050  | 0.196741  |
| C  | 2.285309  | 1.525092  | -0.344591 |
| C  | 0.012832  | 1.900673  | -0.237923 |
| C  | 0.211860  | 3.233872  | 0.083419  |
| C  | 2.585621  | 2.845381  | -0.033113 |
| H  | -2.451816 | -1.631277 | -1.373643 |
| H  | -2.513280 | 3.058642  | 0.061443  |
| H  | -4.637638 | -0.499335 | -1.160669 |
| H  | 3.090095  | 0.804678  | -0.532452 |
| H  | -0.617522 | 3.925331  | 0.245047  |
| H  | 3.628190  | 3.160832  | 0.024059  |
| Br | 1.823441  | -1.873700 | -2.417356 |
| Br | 2.512815  | -1.455052 | 1.649973  |
| C  | -3.564493 | -2.557709 | 1.711413  |
| O  | 1.650089  | 5.012154  | 0.510532  |
| O  | -4.831004 | 2.105523  | -0.289939 |
| C  | 2.944656  | 5.563758  | 0.632725  |
| H  | 2.815200  | 6.620829  | 0.892566  |
| H  | 3.519240  | 5.064811  | 1.430928  |
| H  | 3.502126  | 5.492314  | -0.316130 |
| C  | -6.095252 | 1.506993  | -0.488309 |
| H  | -6.232883 | 0.636574  | 0.175438  |
| H  | -6.847305 | 2.266356  | -0.244822 |
| H  | -6.229312 | 1.190885  | -1.536198 |
| H  | -3.866749 | -3.380624 | 1.046281  |
| H  | -3.806146 | -2.852642 | 2.746709  |
| H  | -4.196833 | -1.682601 | 1.479566  |

CP-1d<sup>1</sup>-s

Geometry with 43 atoms:

Thermal correction to Gibbs Free Energy: 0.272293

Total energy: -7501.201156790

|    |           |           |           |
|----|-----------|-----------|-----------|
| Ni | 0.085617  | 0.964152  | -0.694938 |
| C  | -1.823338 | -0.937509 | 1.358917  |
| C  | 0.807453  | -1.482197 | 2.146704  |
| C  | -1.034768 | 0.090985  | 1.870677  |
| C  | -1.311885 | -2.223938 | 1.204159  |
| C  | 0.000237  | -2.483415 | 1.592160  |
| C  | 0.270280  | -0.196852 | 2.267016  |
| H  | -1.442341 | 1.099870  | 1.978653  |
| H  | -1.934605 | -3.018953 | 0.782911  |

|    |           |           |           |
|----|-----------|-----------|-----------|
| H  | 0.405381  | -3.493831 | 1.466649  |
| H  | 0.889214  | 0.604075  | 2.687804  |
| N  | 1.998042  | 0.982012  | -0.123069 |
| C  | 4.658684  | 0.706059  | 0.596664  |
| C  | 2.623752  | 1.989298  | 0.508112  |
| C  | 2.659534  | -0.160591 | -0.395727 |
| C  | 4.000697  | -0.330068 | -0.056060 |
| C  | 3.963420  | 1.874578  | 0.887636  |
| N  | 0.600814  | -0.810153 | -1.395368 |
| C  | 1.487736  | -3.356122 | -2.035548 |
| C  | -0.215107 | -1.654157 | -2.048911 |
| C  | 1.852515  | -1.194750 | -1.072533 |
| C  | 2.331212  | -2.467450 | -1.378000 |
| C  | 0.205905  | -2.944608 | -2.380788 |
| H  | 4.525275  | -1.257698 | -0.292718 |
| H  | 4.449020  | 2.706184  | 1.404095  |
| H  | 3.345542  | -2.764469 | -1.104746 |
| H  | -0.477210 | -3.611843 | -2.912262 |
| Br | -1.575219 | 2.594917  | -0.893475 |
| Br | -3.629603 | -0.588290 | 0.889643  |
| C  | 2.196450  | -1.784736 | 2.616038  |
| H  | 5.708982  | 0.600416  | 0.878925  |
| H  | 1.833510  | -4.362519 | -2.283831 |
| C  | 1.825279  | 3.218538  | 0.770438  |
| H  | 1.549038  | 3.704789  | -0.180228 |
| H  | 0.874138  | 2.962595  | 1.265417  |
| H  | 2.376697  | 3.939811  | 1.388687  |
| C  | -1.571447 | -1.149083 | -2.398071 |
| H  | -2.221748 | -1.126689 | -1.506057 |
| H  | -1.505836 | -0.110826 | -2.760755 |
| H  | -2.057067 | -1.777441 | -3.157426 |
| H  | 2.832299  | -0.885031 | 2.606547  |
| H  | 2.192484  | -2.168467 | 3.650965  |
| H  | 2.677048  | -2.555107 | 1.991498  |

CP-1e<sup>1</sup>-s

Geometry with 39 atoms:

Thermal correction to Gibbs Free Energy: 0.235222

Total energy: -7498.772735380

|    |           |          |           |
|----|-----------|----------|-----------|
| Ni | 0.708984  | 0.110694 | 0.652921  |
| C  | 1.244581  | 0.831616 | -1.216840 |
| C  | -0.219620 | 3.231708 | -0.972845 |
| C  | 1.660348  | 1.819890 | -0.288812 |
| C  | 0.104346  | 1.057038 | -2.029898 |
| C  | -0.618633 | 2.219541 | -1.882367 |
| C  | 0.915455  | 3.020359 | -0.207613 |
| H  | 2.651836  | 1.765715 | 0.170547  |
| H  | -0.192150 | 0.299697 | -2.762613 |
| H  | -1.517255 | 2.374526 | -2.490538 |

|    |           |           |           |
|----|-----------|-----------|-----------|
| H  | 1.257765  | 3.804973  | 0.476595  |
| N  | -1.240216 | 0.692234  | 0.928322  |
| C  | -3.976393 | 1.250589  | 0.840652  |
| C  | -1.713065 | 1.843124  | 1.378332  |
| C  | -2.114629 | -0.224977 | 0.452675  |
| C  | -3.504571 | 0.003981  | 0.378886  |
| C  | -3.080923 | 2.164372  | 1.355246  |
| N  | -0.241274 | -1.654605 | 0.131726  |
| C  | -1.853479 | -3.718831 | -0.828649 |
| C  | 0.284514  | -2.818921 | -0.207686 |
| C  | -1.577813 | -1.486781 | 0.025637  |
| C  | -2.441824 | -2.491170 | -0.458833 |
| C  | -0.490458 | -3.885480 | -0.694546 |
| H  | -3.413361 | 3.131327  | 1.738555  |
| H  | -0.006276 | -4.826815 | -0.961955 |
| Br | 2.396890  | -0.510012 | 2.278033  |
| Br | 2.520123  | -0.477314 | -1.819900 |
| C  | -1.010795 | 4.498274  | -0.877474 |
| H  | -5.046881 | 1.471734  | 0.797238  |
| H  | -2.486334 | -4.525800 | -1.209640 |
| H  | 1.370212  | -2.916989 | -0.090609 |
| H  | -0.981989 | 2.556301  | 1.773941  |
| C  | -3.847892 | -2.223996 | -0.539576 |
| C  | -4.357189 | -1.025666 | -0.139533 |
| H  | -4.504341 | -3.009999 | -0.923994 |
| H  | -5.431625 | -0.828554 | -0.196761 |
| H  | -0.959783 | 5.076212  | -1.815899 |
| H  | -2.079277 | 4.288640  | -0.698358 |
| H  | -0.648843 | 5.144562  | -0.063812 |

#### CP-1f'-s

Geometry with 43 atoms:

Thermal correction to Gibbs Free Energy: 0.271233

Total energy: -7501.175181550

|    |           |           |           |
|----|-----------|-----------|-----------|
| Ni | 0.777722  | -0.369754 | -0.564675 |
| C  | 1.280135  | -0.488630 | 1.455879  |
| C  | -0.901273 | -2.118927 | 2.166939  |
| C  | 1.255419  | -1.841517 | 1.045479  |
| C  | 0.239824  | 0.034344  | 2.260586  |
| C  | -0.838955 | -0.763466 | 2.574887  |
| C  | 0.155437  | -2.637857 | 1.434457  |
| H  | 2.141724  | -2.307021 | 0.605472  |
| H  | 0.289910  | 1.074251  | 2.600214  |
| H  | -1.664274 | -0.344692 | 3.161673  |
| H  | 0.141382  | -3.693898 | 1.142239  |
| N  | -1.201070 | -0.679531 | -0.774272 |
| C  | -3.977527 | -0.953386 | -0.663991 |
| C  | -1.774692 | -1.867420 | -0.970696 |
| C  | -1.974795 | 0.397728  | -0.559325 |

|    |           |           |           |
|----|-----------|-----------|-----------|
| C  | -3.363682 | 0.288929  | -0.490007 |
| C  | -3.148230 | -2.049334 | -0.933605 |
| N  | 0.098454  | 1.581218  | -0.564532 |
| C  | -1.103881 | 4.063976  | -0.073640 |
| C  | 0.831278  | 2.692508  | -0.482002 |
| C  | -1.238895 | 1.674270  | -0.424175 |
| C  | -1.862402 | 2.894894  | -0.174763 |
| C  | 0.279888  | 3.942756  | -0.237756 |
| H  | -1.093319 | -2.703525 | -1.165758 |
| H  | -3.981420 | 1.171090  | -0.303512 |
| H  | -3.573916 | -3.042212 | -1.102768 |
| H  | 1.913069  | 2.570235  | -0.608319 |
| H  | -2.947486 | 2.947502  | -0.052725 |
| H  | 0.927810  | 4.821050  | -0.171842 |
| Br | 2.104086  | -1.270852 | -2.374685 |
| Br | 2.950954  | 0.464446  | 1.388387  |
| C  | -1.747041 | 5.388067  | 0.169905  |
| C  | -5.455901 | -1.116150 | -0.548275 |
| H  | -1.947533 | 5.897829  | -0.787724 |
| H  | -1.093960 | 6.050837  | 0.756389  |
| H  | -2.709359 | 5.282602  | 0.691265  |
| H  | -5.842475 | -1.815373 | -1.304882 |
| H  | -5.983147 | -0.156816 | -0.647285 |
| H  | -5.714798 | -1.538405 | 0.437744  |
| C  | -2.088865 | -2.949793 | 2.538589  |
| H  | -2.028007 | -3.962198 | 2.111879  |
| H  | -2.189935 | -3.045864 | 3.632871  |
| H  | -3.023632 | -2.485790 | 2.177109  |

#### CP-1g'-s

Geometry with 35 atoms:

Thermal correction to Gibbs Free Energy: 0.209263

Total energy: -7420.622404570

|    |           |           |           |
|----|-----------|-----------|-----------|
| C  | 1.022758  | 1.000657  | -1.143300 |
| C  | -1.211366 | 2.709391  | -1.151304 |
| C  | 0.890458  | 1.979460  | -0.129072 |
| C  | 0.062701  | 0.901425  | -2.177468 |
| C  | -1.040598 | 1.726479  | -2.157970 |
| C  | -0.239832 | 2.831047  | -0.171751 |
| H  | 1.728461  | 2.217336  | 0.532692  |
| H  | 0.199017  | 0.162383  | -2.973185 |
| H  | -1.797932 | 1.630354  | -2.943658 |
| H  | -0.337963 | 3.610469  | 0.592205  |
| Br | 1.517530  | -0.108913 | 2.707688  |
| Br | 2.723049  | 0.134914  | -1.381319 |
| C  | -2.416746 | 3.596248  | -1.180122 |
| H  | -2.431903 | 4.293077  | -0.328720 |
| H  | -2.456234 | 4.192091  | -2.107456 |
| H  | -3.348278 | 3.004691  | -1.153030 |

|    |           |           |           |
|----|-----------|-----------|-----------|
| Ni | 0.410661  | -0.009206 | 0.571595  |
| N  | -0.128860 | -1.836115 | -0.385668 |
| C  | -1.401294 | -1.966393 | -0.412121 |
| C  | 0.409381  | -2.931059 | -1.186550 |
| C  | -0.829698 | -3.754298 | -1.576914 |
| H  | 0.946825  | -2.516660 | -2.056943 |
| H  | -0.967938 | -3.869891 | -2.660662 |
| N  | -1.621457 | 0.034984  | 0.807741  |
| C  | -2.649685 | 0.811830  | 1.489819  |
| C  | -2.216735 | -0.962644 | 0.271063  |
| C  | -3.959183 | 0.156315  | 1.029169  |
| H  | -2.487304 | 0.746695  | 2.579353  |
| H  | -4.505987 | 0.756987  | 0.285225  |
| O  | -1.943288 | -2.981833 | -1.063072 |
| O  | -3.529680 | -1.064364 | 0.373304  |
| H  | 1.143920  | -3.506995 | -0.602448 |
| H  | -0.864287 | -4.747774 | -1.106143 |
| H  | -2.580086 | 1.875916  | 1.214835  |
| H  | -4.644084 | -0.114205 | 1.843121  |

CP-1h<sup>1</sup>-s

Geometry with 46 atoms:

Thermal correction to Gibbs Free Energy: 0.283888

Total energy: -7669.602693620

|    |           |           |           |
|----|-----------|-----------|-----------|
| C  | 2.712865  | 1.163650  | -2.042727 |
| C  | 1.421417  | 1.151247  | -1.517868 |
| N  | 0.772401  | -0.006590 | -1.315484 |
| C  | 1.370913  | -1.188879 | -1.532040 |
| C  | 2.660690  | -1.250600 | -2.057706 |
| C  | 3.325743  | -0.055565 | -2.332389 |
| C  | 0.646722  | 2.328913  | -1.086380 |
| C  | 0.546437  | -2.336970 | -1.113318 |
| C  | 0.991002  | -3.660257 | -1.123016 |
| C  | 0.153080  | -4.654420 | -0.630858 |
| C  | -1.109193 | -4.305023 | -0.152233 |
| C  | -1.484350 | -2.966507 | -0.192468 |
| N  | -0.592822 | 2.048673  | -0.629197 |
| N  | -0.680180 | -2.008359 | -0.653277 |
| C  | -1.355040 | 3.036087  | -0.158787 |
| C  | -0.922240 | 4.356506  | -0.104408 |
| C  | 0.353927  | 4.656182  | -0.579976 |
| C  | 1.147773  | 3.631921  | -1.083264 |
| Ni | -1.063715 | 0.029443  | -0.684830 |
| H  | 3.239428  | 2.104157  | -2.220796 |
| H  | 3.146212  | -2.210619 | -2.247662 |
| H  | 4.333535  | -0.074740 | -2.754402 |
| H  | 1.986638  | -3.908493 | -1.498323 |
| H  | 0.484288  | -5.695842 | -0.619249 |
| H  | -1.795068 | -5.056444 | 0.244567  |

|    |           |           |           |
|----|-----------|-----------|-----------|
| H  | -2.470145 | -2.632088 | 0.154350  |
| H  | -2.355634 | 2.742272  | 0.182556  |
| H  | -1.575242 | 5.132624  | 0.300247  |
| H  | 0.729628  | 5.682205  | -0.557879 |
| H  | 2.152900  | 3.840517  | -1.457311 |
| Br | -3.487103 | 0.087752  | -0.778440 |
| C  | 0.675267  | -0.038574 | 2.106497  |
| C  | 1.332408  | -1.256056 | 1.945855  |
| C  | 1.358021  | 1.167092  | 1.964462  |
| C  | 2.686205  | -1.256695 | 1.620440  |
| H  | 0.788640  | -2.198631 | 2.064759  |
| C  | 2.711706  | 1.143952  | 1.639252  |
| H  | 0.834340  | 2.119124  | 2.097593  |
| C  | 3.399455  | -0.062453 | 1.458505  |
| H  | 3.201634  | -2.214552 | 1.483349  |
| H  | 3.247471  | 2.092673  | 1.517416  |
| C  | 4.843676  | -0.074814 | 1.067680  |
| H  | 5.359033  | -0.972219 | 1.442417  |
| H  | 4.951017  | -0.075986 | -0.031850 |
| H  | 5.374237  | 0.813682  | 1.442315  |
| Br | -1.174143 | -0.022624 | 2.528363  |

TS1a,3a

Geometry with 36 atoms:

Thermal correction to Gibbs Free Energy: 0.221374

Total energy: -4848.419973520

|    |           |           |           |
|----|-----------|-----------|-----------|
| C  | 2.463233  | 0.663708  | -0.661646 |
| C  | 1.814366  | -0.393741 | -0.014894 |
| C  | 1.874912  | -0.543768 | 1.376605  |
| C  | 2.504033  | 0.443671  | 2.120983  |
| C  | 3.110209  | 1.556634  | 1.510839  |
| C  | 3.076502  | 1.646743  | 0.116085  |
| Br | 1.540754  | -2.146426 | -1.200098 |
| H  | 1.401029  | -1.400566 | 1.866164  |
| H  | 2.470003  | 0.735820  | -1.754921 |
| H  | 3.553826  | 2.498499  | -0.381007 |
| H  | 2.526733  | 0.355107  | 3.213247  |
| C  | -2.479646 | -0.140489 | 0.488062  |
| C  | -1.615675 | -2.298106 | 0.831589  |
| C  | -2.694841 | -2.680168 | 1.602575  |
| C  | -3.722691 | -1.729828 | 1.823312  |
| C  | -3.613011 | -0.475413 | 1.270866  |
| C  | -2.262422 | 1.130071  | -0.132890 |
| C  | -0.797600 | 2.412856  | -1.456330 |
| C  | -1.624297 | 3.515710  | -1.419344 |
| C  | -2.841202 | 3.410931  | -0.697498 |
| C  | -3.151059 | 2.231966  | -0.061747 |
| H  | -0.796644 | -3.001751 | 0.632453  |
| H  | -2.743652 | -3.687336 | 2.022770  |

|    |           |           |           |
|----|-----------|-----------|-----------|
| H  | -4.396859 | 0.269448  | 1.434347  |
| H  | 0.155956  | 2.445234  | -1.999194 |
| H  | -1.339423 | 4.436468  | -1.933489 |
| H  | -4.083429 | 2.138152  | 0.501797  |
| N  | -1.489315 | -1.080673 | 0.283042  |
| N  | -1.086654 | 1.249950  | -0.848855 |
| Ni | 0.019295  | -0.349295 | -0.764154 |
| C  | 3.793393  | 2.592810  | 2.344353  |
| H  | -3.527578 | 4.261100  | -0.643330 |
| H  | -4.596712 | -1.989200 | 2.428044  |
| H  | 4.099641  | 3.462035  | 1.743280  |
| H  | 3.138875  | 2.950361  | 3.156617  |
| H  | 4.698130  | 2.185354  | 2.828145  |

TS1b,3b

Geometry with 60 atoms:

Thermal correction to Gibbs Free Energy: 0.428372

Total energy: -5162.800649720

|    |           |           |           |
|----|-----------|-----------|-----------|
| C  | 3.622515  | 1.074765  | -0.057244 |
| C  | 3.102699  | -0.211438 | 0.127271  |
| C  | 2.969959  | -0.766835 | 1.407078  |
| C  | 3.260899  | 0.028291  | 2.505828  |
| C  | 3.720771  | 1.350078  | 2.361564  |
| C  | 3.894696  | 1.852968  | 1.068983  |
| Br | 3.357074  | -1.531175 | -1.520558 |
| H  | 2.604728  | -1.790930 | 1.534558  |
| H  | 3.788879  | 1.475476  | -1.063417 |
| H  | 4.265771  | 2.874941  | 0.933541  |
| H  | 3.125893  | -0.382757 | 3.512952  |
| C  | -1.196782 | -0.710868 | -0.232373 |
| C  | -0.013243 | -2.723555 | -0.333419 |
| C  | -1.112727 | -3.466392 | 0.050571  |
| C  | -2.341279 | -2.799579 | 0.312651  |
| C  | -2.353212 | -1.424611 | 0.161988  |
| C  | -1.129401 | 0.708565  | -0.404729 |
| C  | 0.242524  | 2.525599  | -0.956252 |
| C  | -0.779537 | 3.430235  | -0.782184 |
| C  | -2.073515 | 2.959594  | -0.396214 |
| C  | -2.216560 | 1.600052  | -0.213439 |
| H  | 0.942122  | -3.223834 | -0.540640 |
| H  | -1.010131 | -4.548906 | 0.142906  |
| H  | -3.272748 | -0.863365 | 0.354092  |
| H  | 1.243579  | 2.868139  | -1.249476 |
| H  | -0.583600 | 4.493996  | -0.941496 |
| H  | -3.180189 | 1.181484  | 0.085944  |
| N  | -0.023080 | -1.394109 | -0.479210 |
| N  | 0.102391  | 1.200698  | -0.786936 |
| Ni | 1.467369  | -0.175715 | -0.923355 |
| C  | 4.032255  | 2.173847  | 3.569660  |

|   |           |           |           |
|---|-----------|-----------|-----------|
| C | -3.209386 | 3.955243  | -0.206578 |
| C | -3.603905 | -3.538034 | 0.751157  |
| C | -4.728153 | -3.267051 | -0.251804 |
| H | -5.645278 | -3.805202 | 0.045533  |
| H | -4.978684 | -2.195395 | -0.315044 |
| H | -4.449167 | -3.609300 | -1.263587 |
| C | -3.385194 | -5.045315 | 0.830957  |
| H | -2.607078 | -5.312941 | 1.565775  |
| H | -4.319077 | -5.540588 | 1.145984  |
| H | -3.097189 | -5.473880 | -0.144061 |
| C | -4.024408 | -3.037748 | 2.135817  |
| H | -4.930012 | -3.569096 | 2.477671  |
| H | -3.228420 | -3.213874 | 2.880189  |
| H | -4.252003 | -1.958980 | 2.134335  |
| C | -4.509174 | 3.275886  | 0.207791  |
| H | -5.302410 | 4.032048  | 0.332416  |
| H | -4.857952 | 2.553756  | -0.549908 |
| H | -4.408497 | 2.741963  | 1.168037  |
| C | -3.449091 | 4.698397  | -1.524198 |
| H | -3.732748 | 3.997437  | -2.328559 |
| H | -4.268082 | 5.429679  | -1.408687 |
| H | -2.555859 | 5.251582  | -1.858303 |
| C | -2.820268 | 4.960788  | 0.881243  |
| H | -2.638317 | 4.452327  | 1.844128  |
| H | -1.910159 | 5.525734  | 0.620594  |
| H | -3.632187 | 5.693129  | 1.033929  |
| H | 3.170355  | 2.219625  | 4.256490  |
| H | 4.868174  | 1.741363  | 4.146131  |
| H | 4.308295  | 3.204113  | 3.299685  |

TS1c,3c

Geometry with 44 atoms:

Thermal correction to Gibbs Free Energy: 0.278461

Total energy: -5077.438233340

|    |           |           |           |
|----|-----------|-----------|-----------|
| C  | 3.077912  | 0.915539  | -0.195147 |
| C  | 2.482616  | -0.328816 | 0.038532  |
| C  | 2.425597  | -0.878275 | 1.325945  |
| C  | 2.875609  | -0.112599 | 2.391883  |
| C  | 3.418686  | 1.171162  | 2.203431  |
| C  | 3.509970  | 1.666050  | 0.899275  |
| Br | 2.506487  | -1.666759 | -1.627319 |
| H  | 1.998790  | -1.872777 | 1.489824  |
| H  | 3.182214  | 1.307472  | -1.213027 |
| H  | 3.943214  | 2.657631  | 0.727636  |
| H  | 2.803386  | -0.517637 | 3.407846  |
| C  | -1.864332 | -0.524201 | 0.007251  |
| C  | -0.810967 | -2.612448 | -0.094422 |
| C  | -1.920754 | -3.288490 | 0.383577  |
| C  | -3.073424 | -2.516350 | 0.689869  |



|    |           |           |           |
|----|-----------|-----------|-----------|
| C  | -3.038633 | -1.146814 | 0.501157  |
| C  | -1.724111 | 0.875091  | -0.226982 |
| C  | -0.276970 | 2.578478  | -0.939625 |
| C  | -1.221647 | 3.571504  | -0.754094 |
| C  | -2.500908 | 3.175578  | -0.274504 |
| C  | -2.741535 | 1.839616  | -0.013163 |
| H  | 0.097553  | -3.177335 | -0.343047 |
| H  | -1.883858 | -4.371206 | 0.510368  |
| H  | -3.929688 | -0.561441 | 0.743450  |
| H  | 0.723950  | 2.844645  | -1.304054 |
| H  | -0.967901 | 4.609687  | -0.971866 |
| H  | -3.727621 | 1.547537  | 0.358140  |
| N  | -0.751463 | -1.295109 | -0.285333 |
| N  | -0.487868 | 1.281966  | -0.703618 |
| Ni | 0.776282  | -0.189808 | -0.884528 |
| C  | 3.900015  | 1.963423  | 3.376344  |
| O  | -3.507116 | 4.037634  | -0.053754 |
| O  | -4.215139 | -3.044472 | 1.160938  |
| C  | -3.307501 | 5.405189  | -0.317867 |
| H  | -4.247737 | 5.918498  | -0.074945 |
| H  | -2.503566 | 5.833883  | 0.306094  |
| H  | -3.072369 | 5.590300  | -1.380853 |
| C  | -4.293509 | -4.435112 | 1.360612  |
| H  | -5.301480 | -4.647407 | 1.741892  |
| H  | -4.149818 | -4.995878 | 0.420161  |
| H  | -3.556648 | -4.788054 | 2.103548  |
| H  | 3.103076  | 2.089176  | 4.128639  |
| H  | 4.735393  | 1.455753  | 3.888479  |
| H  | 4.246822  | 2.963887  | 3.077420  |

#### TS1d,3d

Geometry with 42 atoms:

Thermal correction to Gibbs Free Energy: 0.27275

Total energy: -4927.025493040

|    |           |           |           |
|----|-----------|-----------|-----------|
| C  | -1.395716 | -0.503376 | 1.654326  |
| C  | -1.745388 | 0.026038  | 0.404210  |
| C  | -2.143398 | 1.361474  | 0.279997  |
| C  | -2.017561 | 2.205269  | 1.379923  |
| C  | -1.570549 | 1.730559  | 2.619159  |
| C  | -1.280983 | 0.361666  | 2.735137  |
| Br | -2.501943 | -1.272015 | -1.067620 |
| H  | -2.510179 | 1.748534  | -0.675171 |
| H  | -1.169573 | -1.567469 | 1.772197  |
| H  | -0.961815 | -0.039405 | 3.703727  |
| H  | -2.286528 | 3.262004  | 1.272376  |
| C  | 2.282244  | -0.525826 | 0.230360  |
| C  | 1.335588  | -2.692359 | 0.308063  |
| C  | 2.400096  | -3.170387 | 1.057917  |
| C  | 3.436739  | -2.279002 | 1.423091  |

|    |           |           |           |
|----|-----------|-----------|-----------|
| C  | 3.380552  | -0.970635 | 1.008539  |
| C  | 2.161152  | 0.794986  | -0.304876 |
| C  | 0.879518  | 2.198542  | -1.719809 |
| C  | 1.796650  | 3.232383  | -1.587884 |
| C  | 2.921843  | 3.042295  | -0.751972 |
| C  | 3.105804  | 1.835789  | -0.118890 |
| H  | 2.425135  | -4.222929 | 1.352466  |
| H  | 4.181176  | -0.272805 | 1.267389  |
| H  | 1.635725  | 4.171480  | -2.124596 |
| H  | 3.977399  | 1.673884  | 0.520795  |
| N  | 1.261115  | -1.403541 | -0.085786 |
| N  | 1.046911  | 1.020082  | -1.090420 |
| Ni | -0.267889 | -0.411096 | -0.882256 |
| C  | -1.410080 | 2.643475  | 3.791671  |
| H  | 3.648578  | 3.849064  | -0.616308 |
| H  | 4.281766  | -2.631521 | 2.022164  |
| C  | -0.347105 | 2.356204  | -2.558023 |
| H  | -0.763560 | 1.375368  | -2.844104 |
| H  | -1.129641 | 2.914820  | -2.016051 |
| H  | -0.131886 | 2.921937  | -3.477682 |
| C  | 0.217900  | -3.590218 | -0.104950 |
| H  | -0.735122 | -3.288336 | 0.362412  |
| H  | 0.063322  | -3.545220 | -1.196576 |
| H  | 0.415292  | -4.634526 | 0.176329  |
| H  | -0.344003 | 2.854718  | 3.987757  |
| H  | -1.911239 | 3.609286  | 3.627077  |
| H  | -1.815983 | 2.195269  | 4.713161  |

#### TS1e,3e

Geometry with 38 atoms:

Thermal correction to Gibbs Free Energy: 0.233191

Total energy: -4924.619437000

|    |           |           |           |
|----|-----------|-----------|-----------|
| C  | 2.687298  | 0.918065  | -0.589064 |
| C  | 2.148928  | -0.195265 | 0.065835  |
| C  | 2.147351  | -0.287546 | 1.463886  |
| C  | 2.594460  | 0.800846  | 2.198521  |
| C  | 3.081278  | 1.964533  | 1.575417  |
| C  | 3.117283  | 2.001586  | 0.178517  |
| Br | 2.184277  | -2.009929 | -1.055459 |
| H  | 1.763262  | -1.183382 | 1.962406  |
| H  | 2.747283  | 0.953308  | -1.682726 |
| H  | 3.504926  | 2.892791  | -0.327424 |
| H  | 2.565006  | 0.754334  | 3.293274  |
| C  | -2.144344 | -0.507309 | 0.262085  |
| C  | -1.098693 | -2.523313 | 0.775630  |
| C  | -2.209652 | -2.974506 | 1.478789  |
| C  | -3.342613 | -2.147457 | 1.572436  |
| C  | -3.324449 | -0.894702 | 0.961859  |
| C  | -2.060180 | 0.744787  | -0.372306 |

|    |           |           |           |
|----|-----------|-----------|-----------|
| C  | -0.776708 | 2.239489  | -1.625460 |
| C  | -1.794250 | 3.179576  | -1.629454 |
| C  | -3.008343 | 2.886327  | -0.973917 |
| C  | -3.152814 | 1.657516  | -0.331385 |
| H  | -2.188685 | -3.962176 | 1.945492  |
| H  | -1.643202 | 4.135065  | -2.137757 |
| N  | -1.042073 | -1.331345 | 0.174238  |
| N  | -0.881413 | 1.041348  | -1.027518 |
| Ni | 0.419408  | -0.398809 | -0.799854 |
| C  | 3.565107  | 3.113308  | 2.400857  |
| H  | -3.832263 | 3.607052  | -0.959086 |
| H  | -4.235418 | -2.471511 | 2.117146  |
| C  | -4.337150 | 1.249620  | 0.378312  |
| C  | -4.419086 | 0.037369  | 0.992981  |
| H  | -5.328558 | -0.253987 | 1.529360  |
| H  | -5.180335 | 1.947958  | 0.413005  |
| H  | 0.176966  | 2.448752  | -2.126098 |
| H  | -0.205038 | -3.154762 | 0.688259  |
| H  | 2.796888  | 3.440973  | 3.121329  |
| H  | 4.452449  | 2.835089  | 2.995348  |
| H  | 3.837471  | 3.977107  | 1.776176  |

TS1f,3f

Geometry with 42 atoms:

Thermal correction to Gibbs Free Energy: 0.270522

Total energy: -4927.022383940

|    |           |           |           |
|----|-----------|-----------|-----------|
| C  | 2.810690  | 0.865319  | -0.415752 |
| C  | 2.198889  | -0.302084 | 0.053623  |
| C  | 2.146415  | -0.597840 | 1.422180  |
| C  | 2.616251  | 0.348494  | 2.321241  |
| C  | 3.175345  | 1.565035  | 1.889586  |
| C  | 3.263267  | 1.802054  | 0.514716  |
| Br | 2.183486  | -1.929508 | -1.328456 |
| H  | 1.706149  | -1.536911 | 1.772494  |
| H  | 2.909816  | 1.056479  | -1.490029 |
| H  | 3.709342  | 2.736326  | 0.156073  |
| H  | 2.547313  | 0.144127  | 3.395958  |
| C  | -2.138678 | -0.463564 | 0.151366  |
| C  | -1.139365 | -2.578193 | 0.301094  |
| C  | -2.255120 | -3.135609 | 0.887714  |
| C  | -3.392390 | -2.310875 | 1.124241  |
| C  | -3.313484 | -0.985820 | 0.751099  |
| C  | -1.970017 | 0.894352  | -0.265397 |
| C  | -0.504434 | 2.453855  | -1.232353 |
| C  | -1.422389 | 3.475313  | -1.130889 |
| C  | -2.702023 | 3.197863  | -0.565568 |
| C  | -2.951956 | 1.910575  | -0.140319 |
| H  | -0.249534 | -3.191575 | 0.106389  |
| H  | -2.264030 | -4.193932 | 1.165131  |

|    |           |           |           |
|----|-----------|-----------|-----------|
| H  | -4.170581 | -0.326471 | 0.922245  |
| H  | 0.489738  | 2.637025  | -1.660822 |
| H  | -1.170945 | 4.481913  | -1.478090 |
| H  | -3.923687 | 1.669694  | 0.303090  |
| N  | -1.056162 | -1.291379 | -0.066033 |
| N  | -0.745498 | 1.196279  | -0.828438 |
| Ni | 0.475925  | -0.318094 | -0.843857 |
| C  | -3.715208 | 4.286343  | -0.447742 |
| H  | -4.652034 | 3.930503  | 0.006866  |
| H  | -3.331217 | 5.121490  | 0.163971  |
| H  | -3.953913 | 4.715294  | -1.436741 |
| C  | -4.613848 | -2.888816 | 1.756405  |
| H  | -5.409189 | -2.138363 | 1.879661  |
| H  | -5.016597 | -3.721133 | 1.153081  |
| H  | -4.383816 | -3.313020 | 2.749412  |
| C  | 3.675220  | 2.558800  | 2.888478  |
| H  | 2.879530  | 2.851235  | 3.594488  |
| H  | 4.494277  | 2.139502  | 3.497628  |
| H  | 4.050108  | 3.471706  | 2.402107  |

TS1g,3g

Geometry with 34 atoms:

Thermal correction to Gibbs Free Energy: 0.207965

Total energy: -4846.470727620

|    |           |           |           |
|----|-----------|-----------|-----------|
| C  | 2.328643  | 0.400201  | -0.832655 |
| C  | 1.654644  | -0.473025 | 0.031226  |
| C  | 1.702335  | -0.298400 | 1.422235  |
| C  | 2.338828  | 0.825023  | 1.927160  |
| C  | 2.968465  | 1.761198  | 1.085349  |
| C  | 2.951097  | 1.527476  | -0.292277 |
| Br | 1.315143  | -2.420909 | -0.714537 |
| H  | 1.202338  | -1.011162 | 2.085903  |
| H  | 2.342372  | 0.221535  | -1.913492 |
| H  | 3.446985  | 2.235744  | -0.965506 |
| H  | 2.347919  | 0.991983  | 3.010554  |
| Ni | -0.115083 | -0.470753 | -0.742837 |
| C  | 3.652696  | 2.956052  | 1.668711  |
| H  | 4.009522  | 3.643275  | 0.886913  |
| H  | 2.978567  | 3.518629  | 2.336389  |
| H  | 4.523930  | 2.662937  | 2.279920  |
| N  | -1.661785 | -0.980718 | 0.389243  |
| C  | -2.508902 | 0.042314  | 0.460320  |
| C  | -2.210196 | -2.034446 | 1.216496  |
| C  | -3.276922 | -1.305998 | 2.037122  |
| H  | -2.646260 | -2.846808 | 0.599846  |
| H  | -4.207720 | -1.873956 | 2.179886  |
| N  | -1.128406 | 1.172589  | -1.065757 |
| C  | -1.089743 | 2.444937  | -1.758247 |
| C  | -2.225041 | 1.183495  | -0.305192 |

|   |           |           |           |
|---|-----------|-----------|-----------|
| C | -2.112928 | 3.283883  | -0.991051 |
| H | -0.083555 | 2.898756  | -1.736240 |
| H | -2.739926 | 3.927468  | -1.624992 |
| O | -3.568193 | -0.121357 | 1.279816  |
| O | -2.950839 | 2.319569  | -0.336425 |
| H | -1.443610 | -2.503199 | 1.858393  |
| H | -2.894466 | -1.004285 | 3.029819  |
| H | -1.367029 | 2.333893  | -2.826070 |
| H | -1.631032 | 3.913022  | -0.219815 |

|    |           |           |          |
|----|-----------|-----------|----------|
| C  | -1.217676 | 0.528907  | 2.710923 |
| H  | -2.134567 | -1.048634 | 1.561665 |
| C  | -0.036338 | 1.165495  | 3.120429 |
| H  | 2.121626  | 1.055629  | 3.037447 |
| H  | -2.182816 | 0.900873  | 3.073771 |
| Br | 0.072672  | -2.898819 | 0.546166 |
| C  | -0.075494 | 2.386913  | 3.983749 |
| H  | -0.937669 | 2.374682  | 4.668912 |
| H  | 0.841332  | 2.491363  | 4.584314 |
| H  | -0.166253 | 3.304144  | 3.374398 |

#### TS1h,3h

Geometry with 45 atoms:

Thermal correction to Gibbs Free Energy: 0.286362

Total energy: -5095.445774350

|    |           |           |           |
|----|-----------|-----------|-----------|
| C  | 1.156027  | 3.201133  | -0.799744 |
| C  | 1.164964  | 1.803335  | -0.965551 |
| N  | -0.027921 | 1.146002  | -1.054784 |
| C  | -1.209098 | 1.779916  | -0.960112 |
| C  | -1.275127 | 3.153306  | -0.796873 |
| C  | -0.055350 | 3.869577  | -0.718413 |
| C  | 2.308753  | 0.932424  | -1.037037 |
| C  | -2.356881 | 0.855986  | -1.034813 |
| C  | -3.690367 | 1.273022  | -1.057668 |
| C  | -4.699740 | 0.322788  | -1.131685 |
| C  | -4.355994 | -1.029818 | -1.186591 |
| C  | -3.009755 | -1.367855 | -1.155147 |
| N  | 2.018995  | -0.414865 | -1.111190 |
| N  | -2.032898 | -0.460275 | -1.077375 |
| C  | 3.031205  | -1.287400 | -1.180814 |
| C  | 4.366338  | -0.922746 | -1.176613 |
| C  | 4.676827  | 0.453780  | -1.096986 |
| C  | 3.651604  | 1.371586  | -1.030322 |
| Ni | 0.020955  | -0.760823 | -0.722827 |
| H  | 2.094999  | 3.757097  | -0.723099 |
| H  | -2.231811 | 3.675234  | -0.719800 |
| H  | -0.071275 | 4.954061  | -0.582653 |
| H  | -3.931035 | 2.338087  | -1.021020 |
| H  | -5.747729 | 0.632595  | -1.149315 |
| H  | -5.117111 | -1.810310 | -1.249234 |
| H  | -2.694406 | -2.418034 | -1.179403 |
| H  | 2.746335  | -2.346930 | -1.227589 |
| H  | 5.147150  | -1.684258 | -1.233492 |
| H  | 5.717768  | 0.789152  | -1.089641 |
| H  | 3.868886  | 2.441997  | -0.971908 |
| C  | 0.026815  | -1.000252 | 1.318736  |
| C  | 1.226189  | -0.479630 | 1.836677  |
| C  | -1.198321 | -0.567042 | 1.858337  |
| C  | 1.179619  | 0.614323  | 2.691993  |
| H  | 2.189908  | -0.887541 | 1.518591  |

#### TS'1a,3a

Geometry with 36 atoms:

Thermal correction to Gibbs Free Energy: 0.217108

Total energy: -4848.408086730

|    |           |           |           |
|----|-----------|-----------|-----------|
| Ni | -0.726607 | -0.944600 | -0.438174 |
| C  | 2.694283  | -0.606516 | -0.047603 |
| C  | 4.055991  | -0.818138 | -0.136469 |
| C  | 2.129434  | 0.388197  | 0.722287  |
| C  | 4.894321  | 0.022332  | 0.602723  |
| H  | 4.477599  | -1.612670 | -0.764431 |
| C  | 2.982236  | 1.218542  | 1.453444  |
| H  | 1.034913  | 0.516924  | 0.748072  |
| C  | 4.372683  | 1.045878  | 1.406551  |
| H  | 5.981472  | -0.117130 | 0.553777  |
| H  | 2.563012  | 2.021265  | 2.072689  |
| Br | 1.223675  | -1.836295 | -1.229410 |
| N  | -2.341224 | -0.856439 | 0.592008  |
| C  | -4.778632 | -0.492913 | 1.894374  |
| C  | -2.893007 | -1.850178 | 1.309410  |
| C  | -2.993055 | 0.342770  | 0.509971  |
| C  | -4.222253 | 0.537802  | 1.158633  |
| C  | -4.097003 | -1.719511 | 1.975471  |
| N  | -1.169154 | 0.915957  | -0.889487 |
| C  | -2.003444 | 3.549173  | -1.216172 |
| C  | -0.456656 | 1.770279  | -1.637274 |
| C  | -2.310742 | 1.350994  | -0.284077 |
| C  | -2.744455 | 2.677757  | -0.438300 |
| C  | -0.828568 | 3.087830  | -1.834767 |
| H  | -2.328790 | -2.789027 | 1.342033  |
| H  | -4.736285 | 1.498839  | 1.075330  |
| H  | -4.498631 | -2.558631 | 2.548209  |
| H  | 0.452978  | 1.364453  | -2.097533 |
| H  | -3.655940 | 3.018190  | 0.059708  |
| H  | -0.216378 | 3.743280  | -2.458441 |
| C  | 5.281724  | 1.918997  | 2.215275  |
| H  | -2.328679 | 4.585314  | -1.343454 |
| H  | -5.736277 | -0.352853 | 2.402944  |
| H  | 6.244635  | 2.085147  | 1.706918  |

|   |          |          |          |
|---|----------|----------|----------|
| H | 4.825938 | 2.900031 | 2.421048 |
| H | 5.512322 | 1.459601 | 3.192827 |

TS'1b,3b

Geometry with 60 atoms:

Thermal correction to Gibbs Free Energy: 0.426076

Total energy: -5162.790679010

|    |           |           |           |
|----|-----------|-----------|-----------|
| Ni | 0.639814  | -1.297743 | -0.989449 |
| C  | 3.917642  | -1.018052 | 0.093377  |
| C  | 5.287622  | -1.161696 | 0.188056  |
| C  | 3.160672  | -0.337167 | 1.023996  |
| C  | 5.927964  | -0.585755 | 1.290258  |
| H  | 5.864246  | -1.710786 | -0.566572 |
| C  | 3.816533  | 0.231176  | 2.117842  |
| H  | 2.068966  | -0.253852 | 0.896233  |
| C  | 5.206566  | 0.118180  | 2.264390  |
| H  | 7.014916  | -0.686907 | 1.399524  |
| H  | 3.240510  | 0.773790  | 2.877776  |
| Br | 2.763683  | -1.824747 | -1.650822 |
| N  | -1.133881 | -1.595311 | -0.323590 |
| C  | -3.821318 | -1.729194 | 0.533007  |
| C  | -1.732515 | -2.776466 | -0.093070 |
| C  | -1.860280 | -0.455860 | -0.130896 |
| C  | -3.198221 | -0.512303 | 0.294105  |
| C  | -3.040187 | -2.892640 | 0.328400  |
| N  | 0.124087  | 0.594716  | -0.878136 |
| C  | -0.889505 | 3.191720  | -0.465789 |
| C  | 0.868973  | 1.677101  | -1.144019 |
| C  | -1.137116 | 0.776141  | -0.399821 |
| C  | -1.654254 | 2.066585  | -0.190308 |
| C  | 0.418129  | 2.968312  | -0.961892 |
| H  | -1.116931 | -3.667897 | -0.258933 |
| H  | -3.741357 | 0.425378  | 0.428374  |
| H  | -3.453864 | -3.890650 | 0.498119  |
| H  | 1.879439  | 1.485047  | -1.526371 |
| H  | -2.668933 | 2.167311  | 0.200262  |
| H  | 1.082489  | 3.801854  | -1.206020 |
| C  | 5.906843  | 0.758595  | 3.422860  |
| C  | -5.268033 | -1.852287 | 0.989637  |
| C  | -5.938721 | -0.492678 | 1.145147  |
| H  | -5.964547 | 0.067035  | 0.194776  |
| H  | -6.981771 | -0.628727 | 1.476088  |
| H  | -5.432938 | 0.134413  | 1.898846  |
| C  | -6.051013 | -2.666139 | -0.044685 |
| H  | -5.644057 | -3.683102 | -0.168991 |
| H  | -7.104663 | -2.766295 | 0.268487  |
| H  | -6.036879 | -2.172220 | -1.031724 |
| C  | -5.305090 | -2.571550 | 2.341070  |
| H  | -4.877226 | -3.585928 | 2.284054  |

|   |           |           |           |
|---|-----------|-----------|-----------|
| H | -4.742836 | -2.008602 | 3.106146  |
| H | -6.347173 | -2.670183 | 2.691250  |
| C | -1.390498 | 4.613427  | -0.254066 |
| C | -1.358996 | 5.358537  | -1.591543 |
| H | -2.008020 | 4.865682  | -2.336009 |
| H | -1.720882 | 6.392845  | -1.459241 |
| H | -0.341870 | 5.414659  | -2.012941 |
| C | -2.815273 | 4.646121  | 0.285794  |
| H | -2.898600 | 4.144307  | 1.264736  |
| H | -3.136477 | 5.692037  | 0.423223  |
| H | -3.530648 | 4.169636  | -0.405781 |
| C | -0.473352 | 5.320837  | 0.747681  |
| H | -0.472302 | 4.800245  | 1.721030  |
| H | 0.568461  | 5.374738  | 0.391378  |
| H | -0.820456 | 6.354805  | 0.917125  |
| H | 5.266255  | 0.789011  | 4.318300  |
| H | 6.836347  | 0.227412  | 3.680810  |
| H | 6.186249  | 1.802405  | 3.194275  |

TS'1c,3c

Geometry with 44 atoms:

Thermal correction to Gibbs Free Energy: 0.275241

Total energy: -5077.429526940

|    |           |           |           |
|----|-----------|-----------|-----------|
| Ni | -0.035502 | -1.008615 | -0.885274 |
| C  | 3.319850  | -0.921287 | -0.038448 |
| C  | 4.678538  | -1.170736 | -0.034805 |
| C  | 2.680708  | -0.200142 | 0.948774  |
| C  | 5.431479  | -0.664153 | 1.028798  |
| H  | 5.160720  | -1.749672 | -0.832136 |
| C  | 3.448282  | 0.298088  | 2.003489  |
| H  | 1.592740  | -0.032127 | 0.893978  |
| C  | 4.831585  | 0.076421  | 2.057040  |
| H  | 6.512122  | -0.850130 | 1.064493  |
| H  | 2.966153  | 0.870042  | 2.805953  |
| Br | 2.019338  | -1.618205 | -1.685712 |
| N  | -1.783866 | -1.237846 | -0.122988 |
| C  | -4.397929 | -1.274140 | 0.881274  |
| C  | -2.410469 | -2.390706 | 0.142921  |
| C  | -2.453882 | -0.063181 | 0.110226  |
| C  | -3.762797 | -0.067414 | 0.609562  |
| C  | -3.696941 | -2.477694 | 0.642215  |
| N  | -0.463723 | 0.906902  | -0.736418 |
| C  | -1.350850 | 3.523522  | -0.312296 |
| C  | 0.303532  | 1.954685  | -1.046647 |
| C  | -1.700860 | 1.136292  | -0.198878 |
| C  | -2.160241 | 2.442442  | 0.020405  |
| C  | -0.074779 | 3.273708  | -0.866495 |
| H  | -1.840798 | -3.305399 | -0.057870 |
| H  | -4.304196 | 0.864984  | 0.789916  |

|   |           |           |           |
|---|-----------|-----------|-----------|
| H | -4.133386 | -3.458475 | 0.837223  |
| H | 1.288169  | 1.722260  | -1.472400 |
| H | -3.144089 | 2.636305  | 0.455675  |
| H | 0.608107  | 4.075034  | -1.152617 |
| C | 5.655316  | 0.639515  | 3.173633  |
| O | -1.840153 | 4.747122  | -0.078497 |
| O | -5.648200 | -1.215516 | 1.355415  |
| C | -1.050020 | 5.870556  | -0.395492 |
| H | -1.635431 | 6.758962  | -0.124336 |
| H | -0.105932 | 5.881580  | 0.176722  |
| H | -0.817963 | 5.916407  | -1.473758 |
| C | -6.329968 | -2.418054 | 1.630587  |
| H | -7.326359 | -2.142468 | 2.000264  |
| H | -6.448466 | -3.037465 | 0.724460  |
| H | -5.816814 | -3.011199 | 2.407417  |
| H | 6.062078  | 1.631844  | 2.909674  |
| H | 5.060564  | 0.770599  | 4.091060  |
| H | 6.516614  | -0.005280 | 3.409196  |

#### TS'1d,3d

Geometry with 42 atoms:

Thermal correction to Gibbs Free Energy: 0.268679

Total energy: -4927.021284180

|    |           |           |           |
|----|-----------|-----------|-----------|
| Ni | -0.589598 | -0.007190 | -0.949030 |
| C  | 2.776157  | -0.011758 | -0.300421 |
| C  | 4.150547  | -0.010603 | -0.433541 |
| C  | 2.131359  | -0.011718 | 0.919057  |
| C  | 4.917249  | -0.007334 | 0.735654  |
| H  | 4.632436  | -0.016456 | -1.418572 |
| C  | 2.913983  | -0.008986 | 2.075636  |
| H  | 1.028127  | -0.017813 | 0.965166  |
| C  | 4.313731  | -0.003097 | 2.000776  |
| H  | 6.011834  | -0.011257 | 0.665833  |
| H  | 2.430866  | -0.014437 | 3.060434  |
| Br | 1.435270  | -0.014410 | -2.083872 |
| N  | -1.748895 | -1.288724 | -0.053826 |
| C  | -3.558323 | -2.881372 | 1.327728  |
| C  | -1.626492 | -2.632732 | -0.090568 |
| C  | -2.747832 | -0.716213 | 0.675823  |
| C  | -3.673488 | -1.502876 | 1.374857  |
| C  | -2.514918 | -3.457195 | 0.587485  |
| N  | -1.736530 | 1.294845  | -0.066255 |
| C  | -3.532838 | 2.917850  | 1.297097  |
| C  | -1.601808 | 2.637214  | -0.116297 |
| C  | -2.741233 | 0.738928  | 0.668264  |
| C  | -3.660560 | 1.540994  | 1.358037  |
| C  | -2.483332 | 3.476574  | 0.552474  |
| H  | -4.472543 | -1.032704 | 1.952641  |
| H  | -2.390291 | -4.541892 | 0.536751  |

|   |           |           |           |
|---|-----------|-----------|-----------|
| H | -4.464646 | 1.083819  | 1.939216  |
| H | -2.348622 | 4.559509  | 0.491013  |
| C | 5.146701  | 0.031463  | 3.246271  |
| H | 5.352779  | 1.069313  | 3.560754  |
| H | 4.638081  | -0.463204 | 4.087938  |
| H | 6.121508  | -0.457483 | 3.096553  |
| C | -0.484895 | -3.161130 | -0.888751 |
| H | -0.561302 | -2.822372 | -1.936441 |
| H | 0.465570  | -2.753621 | -0.501899 |
| H | -0.438243 | -4.258582 | -0.870508 |
| C | -0.454803 | 3.147438  | -0.918489 |
| H | 0.491586  | 2.734850  | -0.527123 |
| H | -0.533544 | 2.799602  | -1.962985 |
| H | -0.398202 | 4.244551  | -0.910451 |
| H | -4.269447 | -3.513164 | 1.866040  |
| H | -4.238889 | 3.561491  | 1.828000  |

#### TS'1e,3e

Geometry with 38 atoms:

Thermal correction to Gibbs Free Energy: 0.231259

Total energy: -4924.607816020

|    |           |           |           |
|----|-----------|-----------|-----------|
| Ni | -0.306996 | -1.247896 | -0.406417 |
| C  | 3.001546  | -0.415693 | 0.048103  |
| C  | 4.380153  | -0.398594 | -0.033797 |
| C  | 2.272846  | 0.510657  | 0.763941  |
| C  | 5.060601  | 0.609818  | 0.655560  |
| H  | 4.932973  | -1.143602 | -0.619280 |
| C  | 2.969599  | 1.510392  | 1.446985  |
| H  | 1.171939  | 0.456321  | 0.785761  |
| C  | 4.369297  | 1.572826  | 1.404473  |
| H  | 6.155943  | 0.653725  | 0.609997  |
| H  | 2.417468  | 2.263009  | 2.023455  |
| Br | 1.775043  | -1.922830 | -1.078500 |
| N  | -1.955452 | -1.243899 | 0.592344  |
| C  | -4.442741 | -0.832604 | 1.842781  |
| C  | -2.482930 | -2.165629 | 1.405881  |
| C  | -2.670620 | -0.093519 | 0.384636  |
| C  | -3.921726 | 0.157983  | 0.997661  |
| C  | -3.711770 | -2.003352 | 2.042926  |
| N  | -0.891362 | 0.536351  | -1.044907 |
| C  | -2.101174 | 3.010993  | -1.583408 |
| C  | -0.307187 | 1.425538  | -1.847256 |
| C  | -2.090588 | 0.868727  | -0.481797 |
| C  | -2.741835 | 2.101464  | -0.729352 |
| C  | -0.871240 | 2.667799  | -2.142353 |
| H  | -4.083864 | -2.795664 | 2.696888  |
| H  | -0.344983 | 3.351817  | -2.812344 |
| C  | 5.114053  | 2.629939  | 2.159740  |
| H  | -2.572671 | 3.974714  | -1.799843 |

|   |           |           |           |
|---|-----------|-----------|-----------|
| H | -5.407736 | -0.674602 | 2.334161  |
| C | -4.573294 | 1.409276  | 0.724520  |
| C | -4.008584 | 2.339301  | -0.095822 |
| H | -4.513164 | 3.291129  | -0.290846 |
| H | -5.540343 | 1.600113  | 1.201044  |
| H | -1.893099 | -3.076413 | 1.556886  |
| H | 0.656528  | 1.132549  | -2.282142 |
| H | 6.024306  | 2.945872  | 1.625848  |
| H | 4.490101  | 3.519994  | 2.335303  |
| H | 5.437267  | 2.262075  | 3.149697  |

TS'1f,3f

Geometry with 42 atoms:

Thermal correction to Gibbs Free Energy: 0.267323

Total energy: -4927.011073450

|    |           |           |           |
|----|-----------|-----------|-----------|
| Ni | -0.287045 | -1.034532 | -0.700362 |
| C  | 3.081587  | -0.618229 | -0.027182 |
| C  | 4.455006  | -0.755754 | -0.056361 |
| C  | 2.420244  | 0.197249  | 0.867726  |
| C  | 5.202142  | -0.030934 | 0.878295  |
| H  | 4.955081  | -1.405532 | -0.785161 |
| C  | 3.181912  | 0.913630  | 1.792832  |
| H  | 1.321018  | 0.275213  | 0.838487  |
| C  | 4.580207  | 0.807678  | 1.813246  |
| H  | 6.295898  | -0.116019 | 0.880897  |
| H  | 2.684694  | 1.573224  | 2.514962  |
| Br | 1.759238  | -1.665647 | -1.500531 |
| N  | -1.972114 | -1.222473 | 0.196229  |
| C  | -4.535641 | -1.224436 | 1.354380  |
| C  | -2.515710 | -2.355074 | 0.674914  |
| C  | -2.692894 | -0.064775 | 0.284909  |
| C  | -3.974503 | -0.056533 | 0.858891  |
| C  | -3.766451 | -2.406602 | 1.254064  |
| N  | -0.817966 | 0.853243  | -0.832209 |
| C  | -1.816768 | 3.474777  | -0.734684 |
| C  | -0.120074 | 1.875003  | -1.348606 |
| C  | -2.024492 | 1.108263  | -0.252398 |
| C  | -2.534500 | 2.416557  | -0.196195 |
| C  | -0.568237 | 3.180356  | -1.329683 |
| H  | -1.901955 | -3.258421 | 0.582466  |
| H  | -4.539593 | 0.879172  | 0.912300  |
| H  | -4.156077 | -3.357024 | 1.630972  |
| H  | 0.846027  | 1.618059  | -1.801396 |
| H  | -3.500732 | 2.607026  | 0.281419  |
| H  | 0.038752  | 3.976246  | -1.771592 |
| C  | -2.322400 | 4.877031  | -0.694133 |
| H  | -3.303262 | 4.946214  | -0.201180 |
| H  | -1.618686 | 5.535418  | -0.156640 |
| H  | -2.417651 | 5.291541  | -1.712318 |

|   |           |           |          |
|---|-----------|-----------|----------|
| C | -5.893566 | -1.253706 | 1.969622 |
| H | -6.362133 | -0.258498 | 1.977764 |
| H | -6.560007 | -1.944297 | 1.424995 |
| H | -5.848377 | -1.622446 | 3.008690 |
| C | 5.386640  | 1.557131  | 2.828447 |
| H | 6.414495  | 1.739686  | 2.478253 |
| H | 4.927948  | 2.527786  | 3.074955 |
| H | 5.464045  | 0.992014  | 3.774216 |

TS'1g,3g

Geometry with 34 atoms:

Thermal correction to Gibbs Free Energy: 0.204544

Total energy: -4846.456188310

|    |           |           |           |
|----|-----------|-----------|-----------|
| Ni | 0.924578  | -1.116054 | 0.096535  |
| N  | 2.538097  | -0.543377 | -0.815513 |
| C  | 2.956947  | 0.617036  | -0.375411 |
| C  | 3.547640  | -1.009122 | -1.757478 |
| C  | 4.438375  | 0.221545  | -1.970323 |
| H  | 4.102831  | -1.862654 | -1.328027 |
| H  | 5.515655  | 0.012831  | -1.916008 |
| N  | 1.136043  | 0.626532  | 1.085537  |
| C  | 0.446763  | 1.545089  | 1.976940  |
| C  | 2.173733  | 1.269139  | 0.623425  |
| C  | 1.438392  | 2.707049  | 2.135269  |
| H  | -0.513676 | 1.863450  | 1.527554  |
| H  | 1.971623  | 2.681532  | 3.100238  |
| O  | 4.087775  | 1.109139  | -0.892204 |
| O  | 2.403351  | 2.503696  | 1.083904  |
| H  | 3.090829  | -1.363749 | -2.694661 |
| H  | 4.227452  | 0.737085  | -2.922342 |
| H  | 0.202388  | 1.067007  | 2.939366  |
| H  | 0.990346  | 3.702406  | 2.009136  |
| Br | -1.017864 | -2.189575 | 0.650499  |
| C  | -2.484345 | -0.626205 | -0.097862 |
| C  | -3.849685 | -0.781513 | 0.035983  |
| C  | -1.897243 | 0.501601  | -0.630652 |
| C  | -4.669203 | 0.265597  | -0.398309 |
| H  | -4.286886 | -1.692924 | 0.461497  |
| C  | -2.731314 | 1.535933  | -1.061853 |
| H  | -0.799097 | 0.569249  | -0.704717 |
| C  | -4.125008 | 1.434623  | -0.947728 |
| H  | -5.758836 | 0.173020  | -0.312253 |
| H  | -2.295248 | 2.442775  | -1.498870 |
| C  | -5.012472 | 2.562553  | -1.380116 |
| H  | -4.557063 | 3.147621  | -2.193854 |
| H  | -5.993137 | 2.199017  | -1.723767 |
| H  | -5.203572 | 3.263279  | -0.548793 |

TS'1h,3h

Geometry with 45 atoms:

Thermal correction to Gibbs Free Energy: 0.281041

Total energy: -5095.431734320

|    |           |           |           |
|----|-----------|-----------|-----------|
| C  | -3.962192 | 1.362146  | 1.239903  |
| C  | -2.727268 | 1.273226  | 0.600193  |
| N  | -2.197226 | 0.072033  | 0.297216  |
| C  | -2.820928 | -1.077178 | 0.622816  |
| C  | -4.058732 | -1.054659 | 1.263149  |
| C  | -4.633966 | 0.181556  | 1.565920  |
| C  | -1.863544 | 2.395178  | 0.210611  |
| C  | -2.049691 | -2.271532 | 0.256453  |
| C  | -2.435739 | -3.577784 | 0.573759  |
| C  | -1.608918 | -4.634895 | 0.221661  |
| C  | -0.407022 | -4.362700 | -0.439043 |
| C  | -0.096169 | -3.041344 | -0.728168 |
| N  | -0.729753 | 2.035292  | -0.445376 |
| N  | -0.889736 | -2.015641 | -0.402967 |
| C  | 0.142110  | 2.988190  | -0.790864 |
| C  | -0.061264 | 4.335271  | -0.525407 |
| C  | -1.235430 | 4.714614  | 0.131913  |
| C  | -2.143226 | 3.733461  | 0.504221  |
| Ni | -0.552783 | -0.003016 | -0.706700 |
| H  | -4.401513 | 2.332474  | 1.483844  |
| H  | -4.574131 | -1.981776 | 1.525416  |
| H  | -5.605847 | 0.225105  | 2.062946  |
| H  | -3.374302 | -3.760534 | 1.102715  |
| H  | -1.892986 | -5.661905 | 0.464635  |
| H  | 0.277752  | -5.162701 | -0.728730 |
| H  | 0.831946  | -2.779316 | -1.252067 |
| H  | 1.044574  | 2.643445  | -1.311533 |
| H  | 0.684502  | 5.072449  | -0.830772 |
| H  | -1.435708 | 5.765271  | 0.356608  |
| H  | -3.062717 | 4.000036  | 1.030983  |
| Br | 1.440975  | -0.093659 | -2.063773 |
| C  | 2.863951  | -0.099088 | -0.292124 |
| C  | 4.238197  | -0.087111 | -0.429498 |
| C  | 2.226911  | -0.101375 | 0.931379  |
| C  | 5.011314  | -0.075344 | 0.736019  |
| H  | 4.717252  | -0.090947 | -1.416239 |
| C  | 3.014478  | -0.091286 | 2.084824  |
| H  | 1.122784  | -0.115021 | 0.984773  |
| C  | 4.413899  | -0.073964 | 2.004072  |
| H  | 6.105858  | -0.070013 | 0.661494  |
| H  | 2.536745  | -0.099595 | 3.072566  |
| C  | 5.252130  | -0.029929 | 3.246126  |
| H  | 5.449538  | 1.009851  | 3.560138  |
| H  | 4.752412  | -0.529495 | 4.090409  |
| H  | 6.231255  | -0.509301 | 3.092855  |

TS1a',3a'

Geometry with 37 atoms:

Thermal correction to Gibbs Free Energy: 0.222663

Total energy: -7422.557481140

|    |           |           |           |
|----|-----------|-----------|-----------|
| Ni | -0.831124 | -0.174980 | 0.341039  |
| C  | 0.153985  | -1.079535 | -1.116702 |
| C  | 2.810588  | -1.810436 | -1.649568 |
| C  | 0.654360  | -2.284710 | -0.615540 |
| C  | 0.923052  | -0.301772 | -1.989056 |
| C  | 2.247322  | -0.657286 | -2.220234 |
| C  | 1.983665  | -2.624068 | -0.865826 |
| H  | 0.021848  | -2.924846 | 0.008197  |
| H  | 0.505392  | 0.599928  | -2.449422 |
| H  | 2.865791  | -0.021823 | -2.865218 |
| H  | 2.388709  | -3.547920 | -0.436515 |
| N  | 0.882788  | 0.516082  | 1.252891  |
| C  | 3.369929  | 1.458884  | 1.992687  |
| C  | 1.694293  | -0.244226 | 1.983425  |
| C  | 1.261515  | 1.751734  | 0.888399  |
| C  | 2.511443  | 2.258759  | 1.245789  |
| C  | 2.957210  | 0.186476  | 2.376453  |
| N  | -0.813741 | 1.798212  | -0.296726 |
| C  | -0.568209 | 4.461798  | -1.014262 |
| C  | -1.765549 | 2.395331  | -1.013897 |
| C  | 0.270211  | 2.500576  | 0.086051  |
| C  | 0.424423  | 3.842045  | -0.263204 |
| C  | -1.687037 | 3.729595  | -1.396806 |
| H  | 1.306038  | -1.231404 | 2.261838  |
| H  | 2.817867  | 3.260342  | 0.937297  |
| H  | 3.599911  | -0.467448 | 2.969895  |
| H  | -2.620788 | 1.774328  | -1.301933 |
| H  | 1.305813  | 4.402819  | 0.054400  |
| H  | -2.491039 | 4.178260  | -1.984019 |
| Br | -1.754054 | -1.367543 | 2.229973  |
| Br | -2.065602 | -1.106428 | -1.543692 |
| C  | 4.251109  | -2.147687 | -1.871253 |
| H  | -0.466561 | 5.513230  | -1.295308 |
| H  | 4.357758  | 1.832195  | 2.275182  |
| H  | 4.904576  | -1.564434 | -1.197527 |
| H  | 4.455419  | -3.212136 | -1.677945 |
| H  | 4.571541  | -1.915602 | -2.899754 |

TS1b',3b'

Geometry with 61 atoms:

Thermal correction to Gibbs Free Energy: 0.432813

Total energy: -7736.942463410

|    |           |           |           |
|----|-----------|-----------|-----------|
| Ni | -1.418416 | -0.970620 | -0.550630 |
| C  | -1.895086 | -0.398435 | 1.285656  |
| C  | -1.864572 | 2.004576  | 2.736443  |

|    |           |           |           |
|----|-----------|-----------|-----------|
| C  | -2.979499 | 0.481963  | 1.192391  |
| C  | -0.863324 | -0.153673 | 2.195681  |
| C  | -0.842230 | 1.056593  | 2.885311  |
| C  | -2.939885 | 1.682564  | 1.895828  |
| H  | -3.817539 | 0.250250  | 0.526854  |
| H  | -0.051883 | -0.877375 | 2.327917  |
| H  | -0.003388 | 1.273112  | 3.557243  |
| H  | -3.765786 | 2.395590  | 1.784834  |
| N  | -0.415545 | 0.783570  | -0.946848 |
| C  | 1.018370  | 3.179613  | -0.764990 |
| C  | -1.011161 | 1.948448  | -1.196781 |
| C  | 0.888544  | 0.767569  | -0.639758 |
| C  | 1.632586  | 1.944187  | -0.546843 |
| C  | -0.339704 | 3.158445  | -1.114733 |
| N  | 0.545125  | -1.571235 | -0.292483 |
| C  | 3.279846  | -2.107854 | 0.048813  |
| C  | 0.975816  | -2.807368 | -0.056095 |
| C  | 1.450388  | -0.575318 | -0.374014 |
| C  | 2.809030  | -0.812763 | -0.205445 |
| C  | 2.319648  | -3.120281 | 0.118420  |
| H  | -2.072982 | 1.896557  | -1.466699 |
| H  | 2.688470  | 1.886376  | -0.278037 |
| H  | -0.888960 | 4.082874  | -1.312878 |
| H  | 0.209840  | -3.588236 | 0.008996  |
| H  | 3.510721  | 0.021837  | -0.279428 |
| H  | 2.592710  | -4.159651 | 0.308955  |
| Br | -2.995514 | -0.899827 | -2.381601 |
| Br | -2.437077 | -2.569650 | 0.985619  |
| C  | 4.770507  | -2.352474 | 0.232467  |
| C  | 1.748758  | 4.504846  | -0.604102 |
| C  | -1.831136 | 3.313835  | 3.459954  |
| C  | 3.226014  | 4.311230  | -0.283897 |
| H  | 3.377801  | 3.775124  | 0.668057  |
| H  | 3.752116  | 3.757016  | -1.079632 |
| H  | 3.714449  | 5.294811  | -0.187238 |
| C  | 1.629878  | 5.312873  | -1.898254 |
| H  | 0.582656  | 5.538972  | -2.156274 |
| H  | 2.158520  | 6.275204  | -1.789946 |
| H  | 2.081676  | 4.772626  | -2.747916 |
| C  | 1.093237  | 5.272180  | 0.548578  |
| H  | 1.612535  | 6.232786  | 0.707615  |
| H  | 0.032236  | 5.494424  | 0.347727  |
| H  | 1.147357  | 4.696454  | 1.489174  |
| C  | 5.265854  | -1.521160 | 1.419290  |
| H  | 5.124186  | -0.439751 | 1.259375  |
| H  | 4.739333  | -1.800221 | 2.348161  |
| H  | 6.344067  | -1.695398 | 1.575704  |
| C  | 5.504228  | -1.922285 | -1.040807 |
| H  | 6.587556  | -2.098058 | -0.927302 |

|   |           |           |           |
|---|-----------|-----------|-----------|
| H | 5.156922  | -2.499883 | -1.914621 |
| H | 5.362618  | -0.851834 | -1.262467 |
| C | 5.077674  | -3.820443 | 0.501787  |
| H | 4.761754  | -4.469081 | -0.332698 |
| H | 6.164773  | -3.952564 | 0.629038  |
| H | 4.591053  | -4.182483 | 1.423237  |
| H | -2.682781 | 3.417237  | 4.154347  |
| H | -0.905900 | 3.432911  | 4.044171  |
| H | -1.897529 | 4.161853  | 2.756666  |

TS1c',3c'

Geometry with 45 atoms:

Thermal correction to Gibbs Free Energy: 0.280526

Total energy: -7651.585008890

|    |           |           |           |
|----|-----------|-----------|-----------|
| Ni | -0.031264 | -1.209429 | -0.536398 |
| C  | -0.763201 | -1.187694 | 1.302760  |
| C  | -2.527654 | 0.452936  | 2.743587  |
| C  | -2.141517 | -1.409800 | 1.218281  |
| C  | -0.253564 | -0.250199 | 2.207510  |
| C  | -1.137248 | 0.577882  | 2.892165  |
| C  | -3.007954 | -0.571288 | 1.917615  |
| H  | -2.531027 | -2.195819 | 0.563150  |
| H  | 0.827375  | -0.132038 | 2.338648  |
| H  | -0.736538 | 1.348763  | 3.561101  |
| H  | -4.090007 | -0.714290 | 1.812792  |
| N  | -0.673474 | 0.701950  | -0.951076 |
| C  | -1.490867 | 3.357285  | -0.887855 |
| C  | -1.933961 | 1.030496  | -1.216264 |
| C  | 0.213459  | 1.675279  | -0.670502 |
| C  | -0.155028 | 3.010556  | -0.634825 |
| C  | -2.401624 | 2.337929  | -1.195281 |
| N  | 1.724767  | -0.139518 | -0.291324 |
| C  | 3.928187  | 1.531438  | 0.064559  |
| C  | 2.932597  | -0.639545 | -0.037377 |
| C  | 1.586780  | 1.201133  | -0.382780 |
| C  | 2.657888  | 2.061014  | -0.207335 |
| C  | 4.065923  | 0.140217  | 0.146546  |
| H  | -2.604998 | 0.197149  | -1.459009 |
| H  | 0.557914  | 3.803607  | -0.399062 |
| H  | -3.451796 | 2.538165  | -1.413750 |
| H  | 3.002714  | -1.730494 | 0.035801  |
| H  | 2.545319  | 3.144962  | -0.280337 |
| H  | 5.022689  | -0.343116 | 0.350387  |
| Br | -1.162644 | -2.353537 | -2.345487 |
| Br | 0.497937  | -3.030728 | 1.006031  |
| C  | -3.463519 | 1.397367  | 3.429114  |
| O  | 4.917958  | 2.402820  | 0.224416  |
| O  | -1.796032 | 4.649399  | -0.815359 |
| C  | 6.218613  | 1.919540  | 0.501751  |



|   |           |          |           |
|---|-----------|----------|-----------|
| H | 6.868674  | 2.798190 | 0.597410  |
| H | 6.243120  | 1.350768 | 1.446509  |
| H | 6.594027  | 1.283212 | -0.317323 |
| C | -3.134493 | 5.049543 | -1.034992 |
| H | -3.817040 | 4.588329 | -0.300930 |
| H | -3.163245 | 6.139539 | -0.912221 |
| H | -3.470100 | 4.795385 | -2.054795 |
| H | -4.444424 | 0.934309 | 3.619878  |
| H | -3.056425 | 1.754190 | 4.388463  |
| H | -3.647470 | 2.293202 | 2.807647  |

TS1d',1d'

Geometry with 43 atoms:

Thermal correction to Gibbs Free Energy: 0.273451

Total energy: -7501.164349420

|    |           |           |           |
|----|-----------|-----------|-----------|
| Ni | -0.760594 | -0.414900 | 0.199551  |
| C  | 0.486696  | -0.803661 | -1.342054 |
| C  | 3.275246  | -0.787176 | -1.728775 |
| C  | 1.248475  | -1.931291 | -1.009372 |
| C  | 1.092988  | 0.267342  | -2.015818 |
| C  | 2.473153  | 0.277620  | -2.174189 |
| C  | 2.631879  | -1.898331 | -1.169504 |
| H  | 0.762647  | -2.816813 | -0.583173 |
| H  | 0.491695  | 1.111567  | -2.372002 |
| H  | 2.948511  | 1.141125  | -2.654749 |
| H  | 3.227756  | -2.763070 | -0.852947 |
| N  | 0.875886  | 0.097058  | 1.395728  |
| C  | 3.349505  | 0.945099  | 2.298966  |
| C  | 1.644896  | -0.743623 | 2.100634  |
| C  | 1.282994  | 1.360133  | 1.162057  |
| C  | 2.527950  | 1.816258  | 1.590104  |
| C  | 2.899839  | -0.336883 | 2.572009  |
| N  | -0.816602 | 1.632481  | 0.027200  |
| C  | -0.454447 | 4.347349  | -0.356158 |
| C  | -1.800625 | 2.358654  | -0.524875 |
| C  | 0.315671  | 2.228797  | 0.451958  |
| C  | 0.533649  | 3.591817  | 0.265629  |
| C  | -1.636910 | 3.732658  | -0.737319 |
| H  | 2.860297  | 2.833562  | 1.376981  |
| H  | 3.508405  | -1.042428 | 3.144292  |
| H  | 1.451750  | 4.067718  | 0.613245  |
| H  | -2.449201 | 4.302032  | -1.196420 |
| Br | -2.459586 | -1.203940 | 1.749201  |
| Br | -1.563250 | -1.321042 | -1.971649 |
| C  | 4.765399  | -0.725640 | -1.839316 |
| H  | 4.333104  | 1.275602  | 2.643050  |
| H  | -0.306127 | 5.417980  | -0.519904 |
| C  | 1.163597  | -2.130539 | 2.354788  |
| H  | 0.071425  | -2.204010 | 2.237029  |

|   |           |           |           |
|---|-----------|-----------|-----------|
| H | 1.639540  | -2.837576 | 1.653268  |
| H | 1.443302  | -2.454083 | 3.369402  |
| C | -3.069836 | 1.677834  | -0.901849 |
| H | -2.977005 | 1.192458  | -1.887659 |
| H | -3.319698 | 0.887676  | -0.174961 |
| H | -3.894790 | 2.402438  | -0.961154 |
| H | 5.214886  | -1.730543 | -1.868863 |
| H | 5.087529  | -0.175691 | -2.738022 |
| H | 5.206185  | -0.201657 | -0.971150 |

TS1e',3e'

Geometry with 39 atoms:

Thermal correction to Gibbs Free Energy: 0.235262

Total energy: -7498.758553640

|    |           |           |           |
|----|-----------|-----------|-----------|
| Ni | 0.847105  | -0.563345 | 0.379184  |
| C  | 1.135241  | 0.718556  | -1.097164 |
| C  | 0.306193  | 3.320096  | -1.745013 |
| C  | 1.828641  | 1.815803  | -0.577436 |
| C  | 0.115228  | 0.905130  | -2.035925 |
| C  | -0.306623 | 2.198341  | -2.325909 |
| C  | 1.390775  | 3.102935  | -0.886230 |
| H  | 2.672175  | 1.659992  | 0.103017  |
| H  | -0.376575 | 0.046381  | -2.505134 |
| H  | -1.136921 | 2.343878  | -3.027026 |
| H  | 1.908136  | 3.963214  | -0.445575 |
| N  | -0.726044 | 0.503480  | 1.201904  |
| C  | -3.040080 | 1.878343  | 1.908546  |
| C  | -0.657162 | 1.584905  | 1.956268  |
| C  | -1.930471 | 0.067392  | 0.780558  |
| C  | -3.137219 | 0.717459  | 1.113282  |
| C  | -1.799957 | 2.312286  | 2.329754  |
| N  | -0.763606 | -1.667489 | -0.365680 |
| C  | -3.147706 | -2.779501 | -1.296624 |
| C  | -0.754158 | -2.756270 | -1.116813 |
| C  | -1.952566 | -1.108019 | -0.044678 |
| C  | -3.187255 | -1.619261 | -0.496010 |
| C  | -1.930377 | -3.351498 | -1.601316 |
| H  | -1.692556 | 3.205497  | 2.949053  |
| H  | -1.864166 | -4.251200 | -2.216755 |
| Br | 2.235736  | -0.626617 | 2.354019  |
| Br | 2.407911  | -1.120856 | -1.407215 |
| C  | -0.191827 | 4.700974  | -2.033447 |
| H  | -3.951684 | 2.418094  | 2.182916  |
| H  | -4.083775 | -3.209230 | -1.666094 |
| H  | 0.227253  | -3.176814 | -1.363599 |
| H  | 0.344634  | 1.886217  | 2.286044  |
| C  | -4.399968 | -0.945840 | -0.133563 |
| C  | -4.376131 | 0.178460  | 0.635101  |
| H  | -5.346465 | -1.358152 | -0.495832 |

|   |           |          |           |
|---|-----------|----------|-----------|
| H | -5.302749 | 0.693967 | 0.905198  |
| H | -0.546469 | 4.798461 | -3.072029 |
| H | -1.044981 | 4.961684 | -1.381394 |
| H | 0.587646  | 5.459527 | -1.861968 |

#### TS1f',3f'

Geometry with 43 atoms:

Thermal correction to Gibbs Free Energy: 0.269239

Total energy: -7501.161645210

|    |           |           |           |
|----|-----------|-----------|-----------|
| Ni | -0.879719 | -0.520093 | -0.479005 |
| C  | -1.174935 | 0.406077  | 1.244747  |
| C  | -0.413319 | 2.851440  | 2.393886  |
| C  | -1.929626 | 1.555793  | 0.991535  |
| C  | -0.126809 | 0.438658  | 2.171042  |
| C  | 0.261306  | 1.660885  | 2.709170  |
| C  | -1.525693 | 2.768980  | 1.547271  |
| H  | -2.793771 | 1.507965  | 0.320808  |
| H  | 0.413646  | -0.476934 | 2.433896  |
| H  | 1.114678  | 1.694264  | 3.396875  |
| H  | -2.091082 | 3.678572  | 1.312576  |
| N  | 0.618628  | 0.762398  | -1.065400 |
| C  | 2.749725  | 2.543036  | -1.319146 |
| C  | 0.415204  | 1.996148  | -1.522611 |
| C  | 1.862420  | 0.370488  | -0.746082 |
| C  | 2.948320  | 1.235227  | -0.867449 |
| C  | 1.445014  | 2.916063  | -1.661074 |
| N  | 0.799355  | -1.654834 | -0.054146 |
| C  | 3.216273  | -2.961750 | 0.474358  |
| C  | 0.812627  | -2.912508 | 0.389234  |
| C  | 1.971104  | -1.019933 | -0.250423 |
| C  | 3.188361  | -1.643597 | 0.010374  |
| C  | 1.986258  | -3.599498 | 0.663848  |
| H  | -0.619281 | 2.244047  | -1.790193 |
| H  | 3.956222  | 0.905287  | -0.601673 |
| H  | 1.234092  | 3.921945  | -2.035313 |
| H  | -0.163619 | -3.385427 | 0.543463  |
| H  | 4.129267  | -1.110597 | -0.150264 |
| H  | 1.942333  | -4.629360 | 1.029055  |
| Br | -2.348328 | -0.220577 | -2.378141 |
| Br | -2.359893 | -1.509268 | 1.194149  |
| C  | 4.504747  | -3.664623 | 0.729866  |
| C  | 3.879940  | 3.510058  | -1.410348 |
| H  | 4.815194  | -4.226536 | -0.168234 |
| H  | 4.410479  | -4.393952 | 1.548355  |
| H  | 5.313458  | -2.957962 | 0.967785  |
| H  | 3.754063  | 4.197077  | -2.260867 |
| H  | 4.848871  | 2.997722  | -1.502471 |
| H  | 3.921871  | 4.132332  | -0.499433 |
| C  | 0.053303  | 4.164718  | 2.937431  |

|   |           |          |          |
|---|-----------|----------|----------|
| H | -0.760014 | 4.906498 | 2.966103 |
| H | 0.465278  | 4.063474 | 3.954232 |
| H | 0.856980  | 4.591823 | 2.310182 |

#### TS1g',3g'

Geometry with 35 atoms:

Thermal correction to Gibbs Free Energy: 0.207244

Total energy: -7420.607236240

|    |           |           |           |
|----|-----------|-----------|-----------|
| C  | 1.378332  | -0.258001 | -0.705256 |
| C  | 3.337213  | 1.736496  | -0.458693 |
| C  | 2.388002  | -0.394258 | 0.251418  |
| C  | 1.390860  | 0.813825  | -1.604455 |
| C  | 2.349184  | 1.809293  | -1.454544 |
| C  | 3.340721  | 0.616835  | 0.380964  |
| H  | 2.399725  | -1.262778 | 0.917771  |
| H  | 0.633121  | 0.889885  | -2.391269 |
| H  | 2.334946  | 2.671364  | -2.132075 |
| H  | 4.110200  | 0.529203  | 1.156936  |
| Br | -0.451711 | -2.125181 | 2.148238  |
| Br | 0.594697  | -2.189777 | -1.540552 |
| C  | 4.373788  | 2.808384  | -0.335773 |
| H  | 4.909535  | 2.748166  | 0.623957  |
| H  | 5.129346  | 2.733038  | -1.137889 |
| H  | 3.928582  | 3.813519  | -0.418422 |
| Ni | -0.314678 | -0.734027 | 0.179925  |
| N  | -1.732699 | 0.202903  | -1.056572 |
| C  | -2.086793 | 1.348627  | -0.612382 |
| C  | -2.454709 | -0.003433 | -2.306479 |
| C  | -3.337995 | 1.247111  | -2.430559 |
| H  | -1.736762 | -0.107519 | -3.137582 |
| H  | -3.151448 | 1.839253  | -3.337429 |
| N  | -0.603716 | 1.073447  | 1.186906  |
| C  | -0.166227 | 1.749527  | 2.397772  |
| C  | -1.473255 | 1.824022  | 0.632814  |
| C  | -0.955521 | 3.068864  | 2.382228  |
| H  | -0.387734 | 1.113975  | 3.270735  |
| H  | -0.322383 | 3.961985  | 2.278184  |
| O  | -2.966933 | 2.061827  | -1.282447 |
| O  | -1.788276 | 2.976392  | 1.190452  |
| H  | -3.035489 | -0.938275 | -2.261861 |
| H  | -4.414913 | 1.037022  | -2.356148 |
| H  | 0.925818  | 1.901460  | 2.372546  |
| H  | -1.621051 | 3.202074  | 3.246939  |

#### TS1h',3h'

Geometry with 46 atoms:

Thermal correction to Gibbs Free Energy: 0.287855

Total energy: -7669.567387550

|   |           |          |           |
|---|-----------|----------|-----------|
| C | -1.300214 | 2.509743 | -2.237772 |
|---|-----------|----------|-----------|

C -1.213240 1.275260 -1.591164  
N -0.023885 0.748490 -1.295630  
C 1.121461 1.364927 -1.590797  
C 1.113577 2.602015 -2.238049  
C -0.116903 3.170867 -2.557884  
C -2.363281 0.451014 -1.154242  
C 2.331138 0.632051 -1.152171  
C 3.629289 1.042951 -1.452662  
C 4.697582 0.283711 -0.984949  
C 4.441639 -0.867544 -0.246240  
C 3.115699 -1.211139 0.004546  
N -2.042939 -0.638491 -0.432426  
N 2.095179 -0.475329 -0.424781  
C -3.003465 -1.454287 -0.009181  
C -4.352059 -1.211123 -0.256755  
C -4.695967 -0.077673 -0.987327  
C -3.689274 0.763034 -1.452204  
Ni 0.035263 -0.809694 -0.010309  
H -2.266633 2.957606 -2.477251  
H 2.042673 3.122411 -2.478250  
H -0.154052 4.142231 -3.056300  
H 3.806696 1.941131 -2.047803  
H 5.724010 0.588414 -1.203238  
H 5.252337 -1.493006 0.132576  
H 2.856108 -2.109801 0.576118  
H -2.674649 -2.336618 0.552231  
H -5.112290 -1.899228 0.118071  
H -5.742947 0.149531 -1.202466  
H -3.935518 1.647691 -2.042951  
Br 0.112396 -3.158413 -0.997142  
C -0.021986 0.555023 1.625477  
C 1.151601 1.317007 1.775736  
C -1.259150 1.207916 1.776719  
C 1.078838 2.704703 1.805982  
H 2.129433 0.827080 1.816335  
C -1.312696 2.596233 1.806202  
H -2.188457 0.631517 1.818388  
C -0.149967 3.379665 1.776197  
H 2.009297 3.283054 1.852573  
H -2.291718 3.087857 1.853240  
C -0.217221 4.872716 1.708802  
H 0.653789 5.343635 2.190767  
H -0.230024 5.221173 0.659731  
H -1.129501 5.263328 2.186121  
Br 0.063409 -1.429635 2.422886

3f-s

Geometry with 42 atoms:

Thermal correction to Gibbs Free Energy: 0.274216

Total energy: -4927.092233960  
Ni -0.213487 -0.646473 -0.045620  
C -2.051739 -0.287545 0.010461  
C -2.663408 0.046047 1.226878  
C -2.855232 -0.244275 -1.137495  
C -4.004496 0.432708 1.290617  
H -2.079672 0.027338 2.157772  
C -4.193285 0.149819 -1.078415  
H -2.429563 -0.516404 -2.112630  
C -4.796526 0.496210 0.137914  
H -4.449354 0.697856 2.258588  
H -4.790446 0.188489 -1.998910  
Br -0.720062 -2.899707 -0.080540  
C 2.448361 0.296647 0.023096  
C 3.837492 0.344446 0.091579  
C 4.576960 -0.840878 0.125288  
C 3.858502 -2.039434 0.089820  
C 2.473217 -2.009691 0.020961  
C 1.590470 1.491356 -0.023458  
C 2.091750 2.788540 -0.027247  
C 1.225811 3.881768 -0.100368  
C -0.139671 3.597617 -0.177872  
C -0.573669 2.281506 -0.162071  
H 4.359404 1.304389 0.122699  
H 4.378876 -3.001008 0.119444  
H 1.878454 -2.929885 -0.006943  
H 3.170187 2.958869 0.020427  
H -0.874909 4.403582 -0.252999  
H -1.641164 2.053742 -0.219728  
N 1.776052 -0.871390 -0.011835  
N 0.261024 1.235834 -0.079212  
C 6.065641 -0.823726 0.173378  
H 6.479442 -0.853956 -0.849669  
H 6.446067 0.091185 0.651394  
H 6.461441 -1.700976 0.706751  
C 1.736351 5.280067 -0.078272  
H 1.772075 5.654364 0.959670  
H 2.757325 5.345637 -0.482490  
H 1.079209 5.957992 -0.643088  
C -6.241171 0.889900 0.202609  
H -6.552876 1.446430 -0.696390  
H -6.902927 0.007657 0.272689  
H -6.453438 1.518097 1.082601

3f-t

Geometry with 42 atoms:

Thermal correction to Gibbs Free Energy: 0.269437

Total energy: -4927.074197680

Ni 0.527637 -0.616265 -0.798839

|    |           |           |           |
|----|-----------|-----------|-----------|
| N  | -0.881075 | 0.811618  | -1.146239 |
| C  | 1.840712  | 0.454476  | 0.217678  |
| N  | -0.855774 | -1.149615 | 0.578135  |
| Br | 1.321443  | -2.486144 | -2.010160 |
| C  | -0.771477 | 1.809038  | -2.023510 |
| C  | -1.728519 | 2.806750  | -2.136473 |
| C  | -2.852492 | 2.778628  | -1.303366 |
| C  | -2.944190 | 1.733346  | -0.379120 |
| C  | -1.945158 | 0.765991  | -0.322436 |
| C  | -1.938391 | -0.354336 | 0.643628  |
| C  | -2.951601 | -0.589799 | 1.569856  |
| C  | -2.851506 | -1.668102 | 2.452952  |
| C  | -1.714123 | -2.479399 | 2.356785  |
| C  | -0.745102 | -2.185585 | 1.410148  |
| C  | 3.198128  | 0.091944  | 0.247102  |
| C  | 4.143687  | 0.801168  | 0.991604  |
| C  | 3.774338  | 1.916935  | 1.752590  |
| C  | 2.424167  | 2.288198  | 1.740496  |
| C  | 1.487785  | 1.572960  | 0.990612  |
| C  | -3.904127 | -1.936153 | 3.472759  |
| C  | -3.920780 | 3.811519  | -1.405761 |
| C  | 4.789590  | 2.697492  | 2.529950  |
| H  | 0.125235  | 1.808538  | -2.654023 |
| H  | -1.597833 | 3.608554  | -2.868397 |
| H  | -3.799489 | 1.687753  | 0.300522  |
| H  | -3.827627 | 0.063109  | 1.610404  |
| H  | -1.587745 | -3.340066 | 3.019493  |
| H  | 0.156495  | -2.799901 | 1.304773  |
| H  | 3.535019  | -0.781182 | -0.329460 |
| H  | 5.194232  | 0.481966  | 0.988933  |
| H  | 2.103925  | 3.154153  | 2.334524  |
| H  | 0.441061  | 1.912391  | 1.022022  |
| H  | -4.104590 | -3.014718 | 3.565476  |
| H  | -3.569908 | -1.588873 | 4.465646  |
| H  | -4.843713 | -1.415776 | 3.237040  |
| H  | -4.695168 | 3.486020  | -2.122091 |
| H  | -4.421277 | 3.973740  | -0.439603 |
| H  | -3.522867 | 4.769418  | -1.772112 |
| H  | 4.336680  | 3.207504  | 3.395239  |
| H  | 5.603793  | 2.053196  | 2.899323  |
| H  | 5.261732  | 3.480194  | 1.909157  |

3g-t

Geometry with 34 atoms:

Thermal correction to Gibbs Free Energy: 0.208507

Total energy: -4846.519923090

|    |          |           |           |
|----|----------|-----------|-----------|
| Ni | 0.254760 | 0.758882  | -0.337622 |
| N  | 1.449629 | -0.002619 | 1.149593  |
| C  | 2.049212 | -1.076971 | 0.801181  |

|    |           |           |           |
|----|-----------|-----------|-----------|
| C  | 1.904989  | 0.323157  | 2.494705  |
| C  | 2.852650  | -0.834699 | 2.844721  |
| H  | 2.402606  | 1.306547  | 2.487543  |
| H  | 3.884516  | -0.520841 | 3.055250  |
| N  | 1.041475  | -0.898041 | -1.318999 |
| C  | 0.828624  | -1.691304 | -2.524657 |
| C  | 1.772426  | -1.603520 | -0.540554 |
| C  | 1.732926  | -2.913610 | -2.316395 |
| H  | -0.241261 | -1.952107 | -2.600452 |
| H  | 2.617844  | -2.920576 | -2.970178 |
| O  | 2.876495  | -1.657159 | 1.640980  |
| O  | 2.204570  | -2.777272 | -0.944351 |
| H  | 1.045085  | 0.394970  | 3.178735  |
| H  | 2.494292  | -1.465789 | 3.670635  |
| H  | 1.091071  | -1.113505 | -3.423464 |
| H  | 1.215981  | -3.878882 | -2.401215 |
| C  | -1.551450 | 0.054861  | 0.011820  |
| C  | -2.678994 | 0.882154  | -0.113683 |
| C  | -3.974777 | 0.411046  | 0.112278  |
| H  | -2.547955 | 1.934897  | -0.401016 |
| C  | -3.089576 | -1.755403 | 0.617227  |
| C  | -4.204754 | -0.917891 | 0.487294  |
| H  | -4.831116 | 1.088208  | -0.003390 |
| H  | -3.240650 | -2.804132 | 0.904480  |
| C  | -5.588708 | -1.419675 | 0.764985  |
| H  | -5.861786 | -1.287772 | 1.827493  |
| H  | -6.344905 | -0.879019 | 0.173445  |
| H  | -5.684603 | -2.494920 | 0.544027  |
| C  | -1.798925 | -1.276057 | 0.383576  |
| Br | 0.577745  | 3.086093  | -0.503083 |
| H  | -0.961565 | -1.981472 | 0.497238  |

3h-t

Geometry with 45 atoms:

Thermal correction to Gibbs Free Energy: 0.287032

Total energy: -5095.491814370

|   |           |           |           |
|---|-----------|-----------|-----------|
| C | 0.562569  | -3.224009 | -1.874287 |
| C | 0.687001  | -2.271526 | -0.861702 |
| N | -0.383230 | -1.598572 | -0.432458 |
| C | -1.599912 | -1.789977 | -0.947195 |
| C | -1.799652 | -2.730507 | -1.959775 |
| C | -0.699494 | -3.449513 | -2.418722 |
| C | 1.948920  | -1.902126 | -0.182566 |
| C | -2.645473 | -0.912748 | -0.374808 |
| C | -3.981920 | -0.949031 | -0.771779 |
| C | -4.879778 | -0.063372 | -0.184529 |
| C | -4.420860 | 0.832355  | 0.776717  |
| C | -3.071401 | 0.804902  | 1.117282  |
| N | 1.830452  | -0.956522 | 0.768852  |

|    |           |           |           |
|----|-----------|-----------|-----------|
| N  | -2.212987 | -0.044840 | 0.559453  |
| C  | 2.908730  | -0.556125 | 1.437125  |
| C  | 4.175814  | -1.078266 | 1.190481  |
| C  | 4.310332  | -2.053938 | 0.207732  |
| C  | 3.182403  | -2.475334 | -0.489780 |
| Ni | -0.095176 | -0.023426 | 0.801213  |
| H  | 1.428248  | -3.781745 | -2.236186 |
| H  | -2.789226 | -2.898687 | -2.388743 |
| H  | -0.825408 | -4.189982 | -3.211794 |
| H  | -4.319769 | -1.658212 | -1.530120 |
| H  | -5.931922 | -0.073759 | -0.479211 |
| H  | -5.093999 | 1.544116  | 1.258706  |
| H  | -2.649861 | 1.482271  | 1.870043  |
| H  | 2.737542  | 0.210277  | 2.203169  |
| H  | 5.036052  | -0.723426 | 1.761602  |
| H  | 5.287557  | -2.488268 | -0.016680 |
| H  | 3.264818  | -3.241049 | -1.263881 |
| C  | 0.342338  | 1.310647  | -0.620027 |
| C  | 1.244592  | 2.351856  | -0.346062 |
| C  | -0.154512 | 1.262639  | -1.930582 |
| C  | 1.622287  | 3.286294  | -1.312197 |
| H  | 1.672044  | 2.444610  | 0.663008  |
| C  | 0.214686  | 2.193265  | -2.905950 |
| H  | -0.858184 | 0.469875  | -2.230176 |
| C  | 1.110284  | 3.227465  | -2.614246 |
| H  | 2.333927  | 4.082012  | -1.054738 |
| H  | -0.197857 | 2.114281  | -3.920380 |
| Br | 0.025097  | 1.017391  | 3.025667  |
| C  | 1.490433  | 4.247968  | -3.645293 |
| H  | 0.860280  | 5.152460  | -3.575403 |
| H  | 2.533900  | 4.580445  | -3.523372 |
| H  | 1.374438  | 3.856036  | -4.668105 |

3f'-s

Geometry with 43 atoms:

Thermal correction to Gibbs Free Energy: 0.27163

Total energy: -7501.168182150

|   |           |           |           |
|---|-----------|-----------|-----------|
| C | -1.606912 | 1.225635  | -0.150035 |
| C | -2.412780 | 2.341564  | -0.364922 |
| C | -2.168310 | 3.181936  | -1.453576 |
| C | -1.097391 | 2.854916  | -2.295226 |
| C | -0.335080 | 1.730830  | -2.024256 |
| C | -1.792690 | 0.266114  | 0.957025  |
| C | -2.780575 | 0.374468  | 1.931801  |
| C | -2.879571 | -0.598142 | 2.931718  |
| C | -1.966973 | -1.658466 | 2.895289  |
| C | -1.006025 | -1.700514 | 1.894987  |
| H | -3.240690 | 2.562166  | 0.314205  |
| H | -0.859121 | 3.477164  | -3.162145 |

|    |           |           |           |
|----|-----------|-----------|-----------|
| H  | 0.506231  | 1.443449  | -2.664791 |
| H  | -3.481871 | 1.213157  | 1.920262  |
| H  | -2.007191 | -2.452155 | 3.646502  |
| H  | -0.269536 | -2.510530 | 1.833815  |
| N  | -0.586267 | 0.945801  | -0.977740 |
| N  | -0.923690 | -0.757665 | 0.959856  |
| Ni | 0.407696  | -0.712007 | -0.566172 |
| C  | -3.906302 | -0.497194 | 4.006560  |
| C  | -3.023765 | 4.370116  | -1.727371 |
| C  | 1.711553  | 0.409300  | 0.310784  |
| C  | 1.696697  | 0.767305  | 1.653262  |
| C  | 2.661003  | 0.963886  | -0.545997 |
| C  | 2.628096  | 1.695896  | 2.130496  |
| H  | 0.968930  | 0.339335  | 2.351801  |
| C  | 3.581719  | 1.891834  | -0.060261 |
| H  | 2.695275  | 0.676350  | -1.605671 |
| C  | 3.582273  | 2.274062  | 1.288188  |
| H  | 2.606578  | 1.978240  | 3.190027  |
| H  | 4.320767  | 2.328030  | -0.743355 |
| Br | 1.913329  | -2.461935 | -0.168528 |
| Br | -0.978811 | -1.895217 | -2.160048 |
| H  | -4.779674 | 0.086609  | 3.680751  |
| H  | -4.240432 | -1.491806 | 4.337908  |
| H  | -3.482838 | 0.011451  | 4.890000  |
| H  | -3.647666 | 4.633830  | -0.861491 |
| H  | -2.413583 | 5.242443  | -2.008748 |
| H  | -3.696545 | 4.167033  | -2.578227 |
| C  | 4.591199  | 3.252481  | 1.806025  |
| H  | 4.295274  | 3.662911  | 2.783873  |
| H  | 5.581110  | 2.780569  | 1.936500  |
| H  | 4.734064  | 4.095157  | 1.109972  |

3g'-s

Geometry with 35 atoms:

Thermal correction to Gibbs Free Energy: 0.208418

Total energy: -7420.612319580

|    |           |           |           |
|----|-----------|-----------|-----------|
| Ni | 0.301879  | -0.546764 | -0.329048 |
| N  | 0.961254  | 0.354435  | 1.402427  |
| C  | 1.195989  | 1.599023  | 1.237639  |
| C  | 1.450679  | -0.005719 | 2.723700  |
| C  | 1.900656  | 1.343904  | 3.312459  |
| H  | 2.271821  | -0.734659 | 2.614533  |
| H  | 2.951870  | 1.369301  | 3.627529  |
| N  | 0.412658  | 1.351988  | -0.956761 |
| C  | 0.235621  | 2.101154  | -2.191802 |
| C  | 0.872442  | 2.160034  | -0.077632 |
| C  | 0.612815  | 3.536607  | -1.784255 |
| H  | -0.802469 | 2.012633  | -2.549446 |
| H  | 1.438703  | 3.964807  | -2.367016 |

|    |           |           |           |
|----|-----------|-----------|-----------|
| O  | 1.744961  | 2.286321  | 2.211559  |
| O  | 1.061879  | 3.415286  | -0.403867 |
| H  | 0.656986  | -0.495132 | 3.310878  |
| H  | 1.267592  | 1.696274  | 4.138942  |
| H  | 0.895988  | 1.677751  | -2.966771 |
| H  | -0.235803 | 4.234619  | -1.793734 |
| Br | 2.537060  | -0.953065 | -1.243612 |
| Br | -0.137898 | -2.742095 | 0.335842  |
| C  | -1.584046 | -0.249830 | -0.058232 |
| C  | -2.169694 | 0.076217  | 1.156650  |
| C  | -2.330653 | -0.280088 | -1.230293 |
| C  | -3.528581 | 0.397222  | 1.186848  |
| H  | -1.589575 | 0.079216  | 2.085077  |
| C  | -3.688897 | 0.041484  | -1.181925 |
| H  | -1.867630 | -0.548992 | -2.188975 |
| C  | -4.309324 | 0.384363  | 0.025106  |
| H  | -3.994087 | 0.661884  | 2.143386  |
| H  | -4.278076 | 0.027004  | -2.106077 |
| C  | -5.773763 | 0.697998  | 0.077630  |
| H  | -6.371160 | -0.210010 | 0.270340  |
| H  | -6.132150 | 1.121838  | -0.872937 |
| H  | -6.006860 | 1.411384  | 0.883007  |

3h<sup>1</sup>-s

Geometry with 46 atoms:

Thermal correction to Gibbs Free Energy: 0.288445

Total energy: -7669.584285190

|    |           |           |           |
|----|-----------|-----------|-----------|
| C  | 1.500718  | -0.298825 | 3.439183  |
| C  | 1.387592  | -0.197298 | 2.052077  |
| N  | 0.229749  | -0.482390 | 1.453516  |
| C  | -0.843207 | -0.908281 | 2.121683  |
| C  | -0.799917 | -1.025966 | 3.511679  |
| C  | 0.386118  | -0.707118 | 4.166442  |
| C  | 2.473779  | 0.197835  | 1.129091  |
| C  | -1.992228 | -1.273149 | 1.265252  |
| C  | -3.189728 | -1.788523 | 1.760087  |
| C  | -4.180787 | -2.161231 | 0.857522  |
| C  | -3.947014 | -2.020586 | -0.507022 |
| C  | -2.728034 | -1.489044 | -0.919182 |
| N  | 2.126344  | 0.253239  | -0.168441 |
| N  | -1.790918 | -1.117794 | -0.053506 |
| C  | 3.022368  | 0.597996  | -1.085518 |
| C  | 4.335799  | 0.919260  | -0.750430 |
| C  | 4.709363  | 0.870785  | 0.588542  |
| C  | 3.768079  | 0.502772  | 1.545997  |
| Ni | 0.107908  | -0.288629 | -0.516555 |
| H  | 2.438649  | -0.066593 | 3.946433  |
| H  | -1.670501 | -1.365682 | 4.075283  |
| H  | 0.446070  | -0.788144 | 5.253893  |

|    |           |           |           |
|----|-----------|-----------|-----------|
| H  | -3.346448 | -1.904773 | 2.834230  |
| H  | -5.127876 | -2.566853 | 1.221073  |
| H  | -4.695082 | -2.313655 | -1.245987 |
| H  | -2.487344 | -1.343809 | -1.980103 |
| H  | 2.663661  | 0.621183  | -2.122044 |
| H  | 5.045966  | 1.203078  | -1.529370 |
| H  | 5.729758  | 1.117555  | 0.891184  |
| H  | 4.041164  | 0.456077  | 2.601935  |
| Br | 0.923240  | -2.625701 | -0.781111 |
| C  | -0.566216 | 1.546852  | -0.251878 |
| C  | -1.902170 | 1.846747  | -0.529315 |
| C  | 0.248162  | 2.557290  | 0.257111  |
| C  | -2.413090 | 3.117835  | -0.272033 |
| H  | -2.569392 | 1.102621  | -0.971588 |
| C  | -0.273398 | 3.830315  | 0.508429  |
| H  | 1.307656  | 2.397013  | 0.472600  |
| C  | -1.612105 | 4.135408  | 0.258500  |
| H  | -3.465039 | 3.324854  | -0.502212 |
| H  | 0.390818  | 4.604647  | 0.910064  |
| C  | -2.177632 | 5.490284  | 0.555890  |
| H  | -2.907990 | 5.800818  | -0.207913 |
| H  | -2.707393 | 5.500771  | 1.524285  |
| H  | -1.389454 | 6.256596  | 0.609454  |
| Br | -0.063628 | 0.140397  | -2.880355 |

4

Geometry with 22 atoms:

Thermal correction to Gibbs Free Energy: 0.148079

Total energy: -404.709975020

|   |           |           |           |
|---|-----------|-----------|-----------|
| N | -2.084025 | 0.079531  | -0.001068 |
| C | -0.693210 | 0.047882  | -0.009817 |
| C | 0.009967  | -1.170840 | 0.081946  |
| C | 0.065696  | 1.232762  | -0.116106 |
| C | 1.400040  | -1.189900 | 0.081750  |
| H | -0.527902 | -2.117966 | 0.165815  |
| C | 1.454507  | 1.188182  | -0.112897 |
| H | -0.435641 | 2.196555  | -0.235830 |
| C | 2.159988  | -0.017101 | -0.007842 |
| H | 1.914174  | -2.155412 | 0.156948  |
| H | 2.012888  | 2.127182  | -0.207525 |
| C | 3.656195  | -0.047892 | 0.028928  |
| H | 4.041398  | 0.020762  | 1.062545  |
| H | 4.054790  | -0.982824 | -0.396540 |
| H | 4.093912  | 0.795429  | -0.529008 |
| C | -2.814702 | -1.162108 | -0.148785 |
| H | -3.875372 | -0.938808 | -0.321764 |
| H | -2.441207 | -1.745185 | -1.006004 |
| H | -2.741438 | -1.793491 | 0.754883  |
| C | -2.792416 | 1.245159  | 0.168502  |

|   |           |          |          |
|---|-----------|----------|----------|
| H | -2.303127 | 2.104280 | 0.631565 |
| H | -3.880683 | 1.175901 | 0.138323 |

TS3f,1f'

Geometry with 64 atoms:

Thermal correction to Gibbs Free Energy: 0.444749

Total energy: -5331.792366910

|    |           |           |           |
|----|-----------|-----------|-----------|
| Ni | -0.944486 | -0.951553 | -0.820835 |
| C  | -0.610378 | -0.803527 | 1.146551  |
| C  | -1.156376 | -0.034403 | 3.877334  |
| C  | -1.530118 | -1.513672 | 1.975900  |
| C  | -0.083588 | 0.384311  | 1.727273  |
| C  | -0.320176 | 0.734018  | 3.055052  |
| C  | -1.774514 | -1.159583 | 3.292677  |
| H  | -2.036127 | -2.400491 | 1.565726  |
| H  | 0.570545  | 1.040528  | 1.136267  |
| H  | 0.140918  | 1.642070  | 3.466198  |
| H  | -2.475634 | -1.752146 | 3.895730  |
| N  | 0.103408  | 0.666818  | -1.425085 |
| C  | 1.473771  | 3.105319  | -1.547130 |
| C  | 1.400957  | 0.706928  | -1.746705 |
| C  | -0.549756 | 1.827751  | -1.183925 |
| C  | 0.117056  | 3.056401  | -1.239216 |
| C  | 2.119506  | 1.885637  | -1.820131 |
| N  | -2.422760 | 0.407802  | -0.836983 |
| C  | -4.166910 | 2.509825  | -0.264137 |
| C  | -3.699578 | 0.161785  | -0.528828 |
| C  | -1.973875 | 1.681542  | -0.857303 |
| C  | -2.830745 | 2.749758  | -0.576430 |
| C  | -4.599663 | 1.172122  | -0.242108 |
| H  | 1.882559  | -0.253615 | -1.955787 |
| H  | -0.423392 | 3.983946  | -1.030893 |
| H  | 3.180390  | 1.861982  | -2.088389 |
| H  | -3.998884 | -0.893221 | -0.517569 |
| H  | -2.456157 | 3.776979  | -0.594941 |
| H  | -5.638490 | 0.928550  | -0.001369 |
| Br | -1.756024 | -3.044123 | -1.593235 |
| C  | 1.044875  | -2.276048 | 1.183964  |
| C  | -5.113656 | 3.619432  | 0.042102  |
| H  | -4.624999 | 4.602913  | -0.010963 |
| H  | -5.962548 | 3.614551  | -0.661923 |
| H  | -5.544164 | 3.498760  | 1.050189  |
| C  | 2.229377  | 4.388633  | -1.592134 |
| H  | 1.591967  | 5.251329  | -1.350747 |
| H  | 3.071565  | 4.367682  | -0.879752 |
| H  | 2.670316  | 4.549282  | -2.590190 |
| C  | -1.402488 | 0.320582  | 5.309728  |
| H  | -1.069115 | 1.345312  | 5.539035  |
| H  | -2.471927 | 0.244503  | 5.571679  |

|   |           |           |           |
|---|-----------|-----------|-----------|
| H | -0.866520 | -0.356281 | 6.000404  |
| H | 1.320036  | -2.027687 | 2.214831  |
| H | 0.413431  | -3.161811 | 1.071989  |
| N | 2.037854  | -2.169398 | 0.233636  |
| C | 3.088421  | -1.258383 | 0.342874  |
| C | 3.176604  | -0.354249 | 1.421160  |
| C | 4.099061  | -1.197569 | -0.637356 |
| C | 4.215147  | 0.565727  | 1.495856  |
| H | 2.417249  | -0.353888 | 2.205753  |
| C | 5.129780  | -0.267542 | -0.542549 |
| H | 4.089378  | -1.879675 | -1.490159 |
| C | 5.213754  | 0.642632  | 0.516649  |
| H | 4.246200  | 1.255873  | 2.347324  |
| H | 5.896887  | -0.250078 | -1.325662 |
| C | 1.953807  | -2.996382 | -0.953732 |
| H | 1.048725  | -3.614784 | -0.903558 |
| H | 1.889283  | -2.391707 | -1.876581 |
| H | 2.831640  | -3.659418 | -1.043368 |
| C | 6.291089  | 1.679173  | 0.580713  |
| H | 5.958565  | 2.636593  | 0.138889  |
| H | 6.586445  | 1.897043  | 1.619820  |
| H | 7.190503  | 1.366837  | 0.026752  |

TS3g,1g'

Geometry with 56 atoms:

Thermal correction to Gibbs Free Energy: 0.380843

Total energy: -5251.241552200

|    |           |           |           |
|----|-----------|-----------|-----------|
| Ni | 1.200881  | -0.921961 | 0.260096  |
| N  | 2.593830  | 0.152229  | 1.217348  |
| C  | 1.999490  | 0.929903  | 2.097769  |
| C  | 3.794775  | 0.853364  | 0.808684  |
| C  | 4.003811  | 1.850815  | 1.949518  |
| H  | 4.652396  | 0.176048  | 0.672390  |
| H  | 4.690020  | 1.462241  | 2.722083  |
| N  | 0.030901  | -0.340320 | 1.833314  |
| C  | -1.358977 | -0.249674 | 2.251339  |
| C  | 0.655657  | 0.648496  | 2.445432  |
| C  | -1.292789 | 0.647195  | 3.488140  |
| H  | -1.979927 | 0.205793  | 1.450389  |
| H  | -1.241961 | 0.064532  | 4.424596  |
| O  | 2.695256  | 1.989183  | 2.536014  |
| O  | -0.055161 | 1.361466  | 3.332123  |
| H  | 3.617967  | 1.363127  | -0.163131 |
| H  | 4.351929  | 2.842987  | 1.631839  |
| H  | -1.797352 | -1.235919 | 2.474006  |
| H  | -2.112709 | 1.373852  | 3.566452  |
| C  | 0.763218  | 0.508305  | -1.057402 |
| C  | 1.556559  | 0.623289  | -2.216917 |
| C  | 1.629662  | 1.806454  | -2.944285 |

|    |           |           |           |
|----|-----------|-----------|-----------|
| H  | 2.120655  | -0.251136 | -2.569644 |
| C  | 0.140648  | 2.854740  | -1.386926 |
| C  | 0.915354  | 2.948462  | -2.546972 |
| H  | 2.252415  | 1.854413  | -3.846519 |
| H  | -0.424544 | 3.732074  | -1.048500 |
| C  | 1.007351  | 4.221183  | -3.331012 |
| H  | 1.978319  | 4.722859  | -3.173609 |
| H  | 0.922815  | 4.036935  | -4.414514 |
| H  | 0.220305  | 4.934821  | -3.043428 |
| C  | 0.074769  | 1.666680  | -0.654443 |
| Br | 2.309391  | -2.775715 | -0.838825 |
| H  | -0.552538 | 1.651153  | 0.246315  |
| N  | -1.774205 | -1.670701 | -1.146951 |
| C  | -2.927439 | -0.945337 | -0.766609 |
| C  | -3.947513 | -1.567070 | -0.032532 |
| C  | -3.061539 | 0.417212  | -1.076361 |
| C  | -5.060573 | -0.841179 | 0.376754  |
| H  | -3.885633 | -2.623448 | 0.233853  |
| C  | -4.182302 | 1.124027  | -0.660366 |
| H  | -2.273960 | 0.951423  | -1.611808 |
| C  | -5.207915 | 0.516240  | 0.073519  |
| H  | -5.839668 | -1.349916 | 0.954301  |
| H  | -4.254723 | 2.189361  | -0.904301 |
| C  | -6.419779 | 1.283719  | 0.498419  |
| H  | -7.203195 | 1.255106  | -0.278856 |
| H  | -6.862218 | 0.867184  | 1.416048  |
| H  | -6.184862 | 2.344230  | 0.676851  |
| C  | -1.581081 | -3.007444 | -0.597726 |
| H  | -0.586432 | -3.372517 | -0.885217 |
| H  | -1.639569 | -2.989776 | 0.501816  |
| H  | -2.345843 | -3.698805 | -0.983135 |
| C  | -0.841172 | -1.159614 | -1.953797 |
| H  | -1.094159 | -0.303195 | -2.577320 |
| H  | -0.016650 | -1.810722 | -2.251210 |

TS3h,1h'

Geometry with 67 atoms:

Thermal correction to Gibbs Free Energy: 0.462644

Total energy: -5500.211508560

|   |           |           |           |
|---|-----------|-----------|-----------|
| C | -0.983311 | -2.726718 | -1.987058 |
| C | -0.757633 | -1.372958 | -1.741262 |
| N | 0.497815  | -0.907475 | -1.591508 |
| C | 1.568603  | -1.718706 | -1.663171 |
| C | 1.409144  | -3.077691 | -1.925562 |
| C | 0.116183  | -3.582324 | -2.084976 |
| C | -1.784634 | -0.330174 | -1.659577 |
| C | 2.847679  | -1.031662 | -1.432748 |
| C | 4.089188  | -1.674507 | -1.433429 |
| C | 5.234303  | -0.930347 | -1.183269 |

|    |           |           |           |
|----|-----------|-----------|-----------|
| C  | 5.117326  | 0.440430  | -0.941735 |
| C  | 3.848491  | 1.005753  | -0.953993 |
| N  | -1.329071 | 0.886927  | -1.277487 |
| N  | 2.745968  | 0.295436  | -1.191983 |
| C  | -2.158392 | 1.930884  | -1.313552 |
| C  | -3.492307 | 1.822494  | -1.684174 |
| C  | -3.983698 | 0.559971  | -2.032329 |
| C  | -3.122098 | -0.524473 | -2.026802 |
| Ni | 0.742705  | 0.844906  | -0.667764 |
| H  | -1.999093 | -3.113477 | -2.100004 |
| H  | 2.273824  | -3.740972 | -1.999193 |
| H  | -0.034919 | -4.646490 | -2.279928 |
| H  | 4.156430  | -2.748405 | -1.622231 |
| H  | 6.213542  | -1.415772 | -1.175142 |
| H  | 5.993857  | 1.060737  | -0.743523 |
| H  | 3.692655  | 2.073342  | -0.753337 |
| H  | -1.714647 | 2.894169  | -1.031440 |
| H  | -4.131191 | 2.708294  | -1.700783 |
| H  | -5.031403 | 0.427647  | -2.316370 |
| H  | -3.475022 | -1.516307 | -2.321093 |
| C  | 1.131714  | -0.041864 | 1.170034  |
| C  | 2.186685  | 0.579797  | 1.890180  |
| C  | 1.076363  | -1.449877 | 1.319378  |
| C  | 3.071571  | -0.122730 | 2.694213  |
| H  | 2.308121  | 1.669511  | 1.806162  |
| C  | 1.950171  | -2.162655 | 2.139749  |
| H  | 0.317444  | -2.030368 | 0.776853  |
| C  | 2.972428  | -1.518473 | 2.844901  |
| H  | 3.873235  | 0.413723  | 3.218920  |
| H  | 1.848632  | -3.252735 | 2.220395  |
| Br | 1.027064  | 3.275091  | -0.339059 |
| C  | 3.925089  | -2.267039 | 3.723991  |
| H  | 4.974275  | -2.018028 | 3.489939  |
| H  | 3.778770  | -2.020118 | 4.790528  |
| H  | 3.804926  | -3.356390 | 3.619421  |
| N  | -1.805828 | 1.160062  | 1.986748  |
| C  | -2.814914 | 0.245349  | 1.658324  |
| C  | -4.153533 | 0.655578  | 1.527120  |
| C  | -2.514630 | -1.111450 | 1.448678  |
| C  | -5.135355 | -0.255531 | 1.159578  |
| H  | -4.439071 | 1.692237  | 1.719738  |
| C  | -3.512450 | -2.007099 | 1.083769  |
| H  | -1.485495 | -1.464310 | 1.542991  |
| C  | -4.839067 | -1.600438 | 0.908054  |
| H  | -6.169537 | 0.092845  | 1.058248  |
| H  | -3.243276 | -3.055497 | 0.908834  |
| C  | -5.890313 | -2.551775 | 0.427589  |
| H  | -5.660228 | -3.591045 | 0.709131  |
| H  | -6.884756 | -2.298188 | 0.827140  |



|   |           |           |           |
|---|-----------|-----------|-----------|
| H | -5.973676 | -2.528395 | -0.674415 |
| C | -2.071676 | 2.585297  | 1.898394  |
| H | -1.122406 | 3.117593  | 1.740477  |
| H | -2.725406 | 2.808500  | 1.044422  |
| H | -2.558686 | 2.962052  | 2.814867  |
| C | -0.594227 | 0.761052  | 2.452122  |
| H | -0.551054 | -0.189074 | 2.990307  |
| H | 0.038796  | 1.566024  | 2.828526  |

TS3h,5h

Geometry with 67 atoms:

Thermal correction to Gibbs Free Energy: 0.461545

Total energy: -5500.222847540

|    |           |           |           |
|----|-----------|-----------|-----------|
| C  | -3.709309 | 1.261718  | 2.699879  |
| C  | -2.938174 | 1.235417  | 1.536650  |
| N  | -2.702303 | 0.081226  | 0.908424  |
| C  | -3.164209 | -1.085650 | 1.363519  |
| C  | -3.944503 | -1.134167 | 2.520164  |
| C  | -4.216520 | 0.058797  | 3.184446  |
| C  | -2.313158 | 2.413307  | 0.895161  |
| C  | -2.751655 | -2.256229 | 0.557995  |
| C  | -3.096095 | -3.570335 | 0.875809  |
| C  | -2.623422 | -4.600131 | 0.068852  |
| C  | -1.832341 | -4.292265 | -1.034500 |
| C  | -1.541173 | -2.954664 | -1.286804 |
| N  | -1.637972 | 2.152311  | -0.238408 |
| N  | -1.983242 | -1.970910 | -0.508823 |
| C  | -1.052665 | 3.144897  | -0.901966 |
| C  | -1.088017 | 4.463271  | -0.456119 |
| C  | -1.769706 | 4.742854  | 0.724709  |
| C  | -2.398117 | 3.707329  | 1.409287  |
| Ni | -1.345198 | 0.061815  | -0.588202 |
| H  | -3.913704 | 2.198363  | 3.221824  |
| H  | -4.332232 | -2.080717 | 2.901343  |
| H  | -4.825231 | 0.050471  | 4.091357  |
| H  | -3.719574 | -3.789848 | 1.744921  |
| H  | -2.874240 | -5.637828 | 0.301773  |
| H  | -1.445904 | -5.072256 | -1.693373 |
| H  | -0.933931 | -2.651422 | -2.147863 |
| H  | -0.538752 | 2.863668  | -1.829728 |
| H  | -0.590118 | 5.249896  | -1.026346 |
| H  | -1.817518 | 5.763597  | 1.111655  |
| H  | -2.944691 | 3.906795  | 2.333332  |
| C  | 0.202669  | -0.122746 | 0.684978  |
| C  | 1.015334  | 0.967866  | 1.034399  |
| C  | 0.530620  | -1.336969 | 1.317811  |
| C  | 2.094079  | 0.856742  | 1.916806  |
| H  | 0.823608  | 1.962873  | 0.605712  |
| C  | 1.600325  | -1.459125 | 2.205582  |

|    |           |           |           |
|----|-----------|-----------|-----------|
| H  | -0.053437 | -2.246219 | 1.113504  |
| C  | 2.415100  | -0.363075 | 2.515544  |
| H  | 2.708028  | 1.739624  | 2.138590  |
| H  | 1.819144  | -2.433304 | 2.663160  |
| C  | 3.605804  | -0.514907 | 3.413259  |
| H  | 4.401937  | -1.099072 | 2.916514  |
| H  | 4.040239  | 0.461267  | 3.682400  |
| H  | 3.356436  | -1.046738 | 4.346736  |
| C  | 1.758341  | -1.139211 | -2.145660 |
| H  | 0.889937  | -1.011858 | -2.792866 |
| H  | 1.894378  | -2.032714 | -1.536639 |
| N  | 2.560095  | -0.045072 | -1.935515 |
| C  | 3.720478  | -0.094374 | -1.171351 |
| C  | 4.284481  | -1.323373 | -0.769496 |
| C  | 4.381238  | 1.084296  | -0.767554 |
| C  | 5.428676  | -1.357409 | 0.019092  |
| H  | 3.837149  | -2.265728 | -1.093731 |
| C  | 5.526458  | 1.025961  | 0.016570  |
| H  | 3.987550  | 2.063719  | -1.047668 |
| C  | 6.075810  | -0.190439 | 0.441613  |
| H  | 5.839809  | -2.331404 | 0.310500  |
| H  | 6.008417  | 1.964108  | 0.316514  |
| C  | 7.283509  | -0.233657 | 1.326905  |
| H  | 7.019101  | -0.069737 | 2.387437  |
| H  | 7.793718  | -1.207936 | 1.270414  |
| H  | 8.012981  | 0.548247  | 1.060467  |
| C  | 2.101413  | 1.234110  | -2.431670 |
| H  | 1.254169  | 1.075909  | -3.112804 |
| H  | 1.750007  | 1.880491  | -1.604911 |
| H  | 2.900538  | 1.766030  | -2.972565 |
| Br | -1.652856 | 0.263457  | -3.067235 |

5a-s

Geometry with 58 atoms:

Thermal correction to Gibbs Free Energy: 0.399823

Total energy: -5253.233676660

|   |           |           |           |
|---|-----------|-----------|-----------|
| C | 0.675879  | -0.392575 | -1.976993 |
| C | -3.279551 | 0.051629  | -0.017568 |
| C | -4.593324 | 0.421546  | -0.309342 |
| C | -4.988263 | 0.516267  | -1.639020 |
| C | -4.069637 | 0.226218  | -2.643042 |
| C | -2.777326 | -0.128351 | -2.270661 |
| C | -2.767778 | -0.118354 | 1.359094  |
| C | -3.543077 | 0.055274  | 2.507141  |
| C | -2.961199 | -0.167409 | 3.750336  |
| C | -1.628208 | -0.563670 | 3.821104  |
| C | -0.922272 | -0.710704 | 2.632334  |
| H | -5.304157 | 0.632327  | 0.491585  |
| H | -4.342132 | 0.274172  | -3.698859 |

|    |           |           |           |
|----|-----------|-----------|-----------|
| H  | -2.020656 | -0.365239 | -3.027328 |
| H  | -4.589888 | 0.356172  | 2.436108  |
| H  | -1.140200 | -0.756258 | 4.778300  |
| H  | 0.129601  | -1.023695 | 2.623202  |
| N  | -2.393621 | -0.197777 | -0.998412 |
| N  | -1.481183 | -0.487163 | 1.446985  |
| Br | -0.636226 | -2.995943 | -0.384591 |
| Ni | -0.451760 | -0.529314 | -0.330043 |
| C  | 0.040474  | 1.312982  | -0.068994 |
| C  | -0.644424 | 2.394668  | -0.626646 |
| C  | 1.095550  | 1.591212  | 0.809040  |
| C  | -0.288171 | 3.710301  | -0.317245 |
| H  | -1.470383 | 2.231158  | -1.331251 |
| C  | 1.450469  | 2.905129  | 1.116115  |
| H  | 1.676112  | 0.774210  | 1.258646  |
| H  | -0.838718 | 4.540582  | -0.776475 |
| H  | 2.285152  | 3.092973  | 1.802987  |
| C  | 0.762465  | 3.991568  | 0.561362  |
| C  | 1.127874  | 5.401269  | 0.916696  |
| H  | 0.753468  | -1.468219 | -2.209280 |
| H  | 0.034331  | 0.099618  | -2.723490 |
| N  | 1.947218  | 0.236861  | -1.971685 |
| C  | 2.082358  | 1.549884  | -2.555080 |
| H  | 2.977659  | 1.609959  | -3.198336 |
| H  | 1.208241  | 1.761621  | -3.184391 |
| H  | 2.155820  | 2.348653  | -1.792046 |
| C  | 2.952739  | -0.222201 | -1.135167 |
| C  | 4.138582  | 0.514959  | -0.937092 |
| C  | 2.817006  | -1.429798 | -0.418261 |
| C  | 5.118044  | 0.070112  | -0.055353 |
| H  | 4.295126  | 1.463235  | -1.455262 |
| C  | 3.809535  | -1.851477 | 0.460043  |
| H  | 1.918040  | -2.043462 | -0.523474 |
| C  | 4.983046  | -1.118801 | 0.669177  |
| H  | 6.019064  | 0.679912  | 0.081359  |
| H  | 3.658817  | -2.788472 | 1.009794  |
| C  | 6.052534  | -1.597813 | 1.603104  |
| H  | 5.630584  | -2.177926 | 2.439166  |
| H  | 6.778562  | -2.256415 | 1.093781  |
| H  | 6.626860  | -0.758931 | 2.027034  |
| H  | 0.640668  | 5.722214  | 1.854239  |
| H  | 2.213044  | 5.513202  | 1.069420  |
| H  | 0.817507  | 6.110972  | 0.134210  |
| H  | -3.550696 | -0.036114 | 4.660841  |
| H  | -6.011486 | 0.807913  | -1.887291 |

5b-s

Geometry with 82 atoms:

Thermal correction to Gibbs Free Energy: 0.608303

|               |                 |           |           |
|---------------|-----------------|-----------|-----------|
| Total energy: | -5567.617805750 |           |           |
| C             | -1.961465       | -2.056640 | -0.577051 |
| C             | 2.169333        | -0.498132 | -0.322265 |
| C             | 3.467135        | -0.944128 | -0.095789 |
| C             | 3.776204        | -2.308212 | -0.165036 |
| C             | 2.726174        | -3.171367 | -0.488483 |
| C             | 1.451682        | -2.654603 | -0.695773 |
| C             | 1.782274        | 0.929599  | -0.293505 |
| C             | 2.673311        | 1.972609  | -0.060764 |
| C             | 2.231877        | 3.301797  | -0.075924 |
| C             | 0.875710        | 3.512190  | -0.343461 |
| C             | 0.043038        | 2.420516  | -0.563133 |
| H             | 4.249955        | -0.219099 | 0.138950  |
| H             | 2.876189        | -4.247947 | -0.580181 |
| H             | 0.619045        | -3.321504 | -0.947837 |
| H             | 3.725397        | 1.750172  | 0.132750  |
| H             | 0.448839        | 4.515290  | -0.383327 |
| H             | -1.025010       | 2.555973  | -0.776180 |
| N             | 1.172580        | -1.359414 | -0.600541 |
| N             | 0.483612        | 1.169357  | -0.533018 |
| Br            | -0.792724       | -0.271244 | -3.125717 |
| Ni            | -0.717469       | -0.493656 | -0.662224 |
| C             | -1.009749       | -0.396304 | 1.236370  |
| C             | -0.250485       | -1.084124 | 2.185538  |
| C             | -1.980206       | 0.500187  | 1.700773  |
| C             | -0.453097       | -0.881932 | 3.553745  |
| H             | 0.514380        | -1.807789 | 1.873800  |
| C             | -2.180999       | 0.700799  | 3.066859  |
| H             | -2.614156       | 1.049521  | 0.991390  |
| H             | 0.152383        | -1.441499 | 4.277439  |
| H             | -2.951296       | 1.406200  | 3.402713  |
| C             | -1.417799       | 0.015776  | 4.021000  |
| C             | -1.616053       | 0.256220  | 5.487367  |
| H             | -2.167507       | -2.162338 | -1.655680 |
| H             | -1.330327       | -2.892474 | -0.239103 |
| N             | -3.158323       | -2.045441 | 0.183925  |
| C             | -3.199544       | -2.753164 | 1.440786  |
| H             | -4.094145       | -3.397277 | 1.509867  |
| H             | -2.317109       | -3.400364 | 1.524559  |
| H             | -3.204743       | -2.069256 | 2.311163  |
| C             | -4.168841       | -1.141171 | -0.100618 |
| C             | -5.291837       | -1.005397 | 0.742056  |
| C             | -4.103900       | -0.296793 | -1.229468 |
| C             | -6.284551       | -0.071108 | 0.465116  |
| H             | -5.390517       | -1.621970 | 1.637837  |
| C             | -5.107965       | 0.631339  | -1.482559 |
| H             | -3.247323       | -0.340635 | -1.908335 |
| C             | -6.223739       | 0.771423  | -0.649700 |
| H             | -7.136583       | 0.010172  | 1.150556  |

|   |           |           |           |
|---|-----------|-----------|-----------|
| H | -5.013479 | 1.278641  | -2.362859 |
| C | -7.310190 | 1.758600  | -0.950845 |
| H | -6.916730 | 2.651321  | -1.462593 |
| H | -8.084385 | 1.329168  | -1.611565 |
| H | -7.822591 | 2.090304  | -0.033958 |
| H | -1.045483 | 1.135518  | 5.834783  |
| H | -2.673491 | 0.449861  | 5.727827  |
| H | -1.280201 | -0.602677 | 6.088915  |
| C | 3.215976  | 4.433316  | 0.187425  |
| C | 2.539234  | 5.798965  | 0.137544  |
| H | 3.284164  | 6.586569  | 0.334633  |
| H | 2.096083  | 6.004087  | -0.851137 |
| H | 1.747658  | 5.894808  | 0.899295  |
| C | 3.830536  | 4.242528  | 1.577935  |
| H | 4.381486  | 3.292337  | 1.665196  |
| H | 4.541181  | 5.058889  | 1.789149  |
| H | 3.052548  | 4.257413  | 2.359569  |
| C | 4.316161  | 4.392913  | -0.878238 |
| H | 3.892747  | 4.519410  | -1.888725 |
| H | 5.035557  | 5.210725  | -0.705628 |
| H | 4.879545  | 3.446134  | -0.862183 |
| C | 5.197225  | -2.782561 | 0.103537  |
| C | 5.326215  | -4.296035 | -0.029670 |
| H | 5.073375  | -4.643588 | -1.045165 |
| H | 6.367048  | -4.596059 | 0.172046  |
| H | 4.683630  | -4.829704 | 0.690213  |
| C | 6.143403  | -2.119505 | -0.902714 |
| H | 5.871428  | -2.386708 | -1.937577 |
| H | 6.136936  | -1.020701 | -0.822121 |
| H | 7.177189  | -2.459086 | -0.723959 |
| C | 5.589170  | -2.380418 | 1.529260  |
| H | 5.564442  | -1.288794 | 1.676979  |
| H | 4.912989  | -2.839465 | 2.269885  |
| H | 6.614829  | -2.722294 | 1.746528  |

|    |           |           |           |
|----|-----------|-----------|-----------|
| C  | 0.334739  | 2.560555  | -0.381043 |
| H  | 4.791299  | 0.301926  | 0.385273  |
| H  | 3.830180  | -3.796224 | -0.588869 |
| H  | 1.503999  | -3.072806 | -0.983928 |
| H  | 4.035092  | 2.258155  | 0.494783  |
| H  | 0.504032  | 4.681286  | -0.084397 |
| H  | -0.729618 | 2.598963  | -0.646504 |
| N  | 1.840329  | -1.085559 | -0.519624 |
| N  | 0.898191  | 1.358140  | -0.385258 |
| Br | -0.071670 | -0.084454 | -3.109673 |
| Ni | -0.119261 | -0.403786 | -0.648420 |
| C  | -0.518906 | -0.424647 | 1.232058  |
| C  | 0.219130  | -1.138137 | 2.178738  |
| C  | -1.550767 | 0.401355  | 1.694892  |
| C  | -0.063414 | -1.030208 | 3.543263  |
| H  | 1.030632  | -1.807862 | 1.864907  |
| C  | -1.832906 | 0.506048  | 3.057462  |
| H  | -2.168367 | 0.970756  | 0.986987  |
| H  | 0.528160  | -1.607716 | 4.264328  |
| H  | -2.651040 | 1.156248  | 3.391729  |
| C  | -1.091667 | -0.205315 | 4.009471  |
| C  | -1.378402 | -0.066374 | 5.474370  |
| H  | -1.344119 | -2.153595 | -1.790930 |
| H  | -0.543147 | -2.869895 | -0.347493 |
| N  | -2.457444 | -2.182177 | -0.014827 |
| C  | -2.524848 | -2.962578 | 1.196950  |
| H  | -3.421548 | -3.606548 | 1.207311  |
| H  | -1.647095 | -3.619087 | 1.257818  |
| H  | -2.545446 | -2.333445 | 2.107995  |
| C  | -3.481671 | -1.288618 | -0.283941 |
| C  | -4.629137 | -1.212312 | 0.532573  |
| C  | -3.400497 | -0.388365 | -1.367446 |
| C  | -5.623915 | -0.273037 | 0.281099  |
| H  | -4.741547 | -1.873830 | 1.394004  |
| C  | -4.407280 | 0.543420  | -1.596129 |
| H  | -2.531973 | -0.391425 | -2.031760 |
| C  | -5.542949 | 0.630839  | -0.783503 |
| H  | -6.493275 | -0.236013 | 0.948427  |
| H  | -4.298873 | 1.235499  | -2.440102 |
| C  | -6.630174 | 1.625680  | -1.055288 |
| H  | -6.232817 | 2.546515  | -1.511125 |
| H  | -7.387747 | 1.226847  | -1.753384 |
| H  | -7.163529 | 1.905523  | -0.133023 |
| H  | -0.873794 | 0.816683  | 5.904467  |
| H  | -2.455669 | 0.059578  | 5.667132  |
| H  | -1.029791 | -0.943402 | 6.041505  |
| O  | 3.170773  | 4.631315  | 0.591990  |
| O  | 5.776203  | -2.021700 | 0.215032  |
| C  | 2.631671  | 5.936936  | 0.624952  |

5c-s

Geometry with 66 atoms:

Thermal correction to Gibbs Free Energy: 0.458116

Total energy: -5482.260290320

|   |           |           |           |
|---|-----------|-----------|-----------|
| C | -1.216220 | -2.072590 | -0.697745 |
| C | 2.735689  | -0.142380 | -0.161048 |
| C | 4.062146  | -0.454828 | 0.089531  |
| C | 4.495027  | -1.782032 | -0.045169 |
| C | 3.564040  | -2.748251 | -0.447050 |
| C | 2.255403  | -2.339494 | -0.668419 |
| C | 2.203113  | 1.236936  | -0.083582 |
| C | 2.974968  | 2.340104  | 0.246942  |
| C | 2.382737  | 3.611450  | 0.262894  |
| C | 1.025337  | 3.723479  | -0.067557 |

|   |          |           |           |
|---|----------|-----------|-----------|
| H | 3.446570 | 6.607993  | 0.920130  |
| H | 2.256657 | 6.240596  | -0.366547 |
| H | 1.816009 | 6.014760  | 1.362914  |
| C | 6.270329 | -3.340030 | 0.090421  |
| H | 6.164946 | -3.710532 | -0.942710 |
| H | 7.334279 | -3.304774 | 0.351452  |
| H | 5.752513 | -4.027670 | 0.779565  |

5d-s

Geometry with 64 atoms:

Thermal correction to Gibbs Free Energy: 0.453444

Total energy: -5331.846634240

|    |           |           |           |
|----|-----------|-----------|-----------|
| C  | 0.699619  | -0.229658 | -2.039824 |
| C  | -3.139387 | -0.107076 | 0.454210  |
| C  | -4.485778 | 0.252963  | 0.436281  |
| C  | -5.166059 | 0.242070  | -0.775422 |
| C  | -4.492693 | -0.152936 | -1.920740 |
| C  | -3.136927 | -0.493185 | -1.842444 |
| C  | -2.365884 | -0.190955 | 1.713807  |
| C  | -2.912011 | 0.119267  | 2.959265  |
| C  | -2.123410 | -0.045392 | 4.091699  |
| C  | -0.830327 | -0.531530 | 3.954689  |
| C  | -0.336218 | -0.819525 | 2.678560  |
| H  | -5.005683 | 0.528005  | 1.354645  |
| H  | -5.001584 | -0.203207 | -2.886372 |
| H  | -3.935910 | 0.483128  | 3.051984  |
| H  | -0.192495 | -0.693417 | 4.826960  |
| N  | -2.481513 | -0.439465 | -0.674254 |
| N  | -1.101277 | -0.625918 | 1.594560  |
| Br | -0.339100 | -3.036099 | -0.566428 |
| Ni | -0.390549 | -0.550025 | -0.359832 |
| C  | -0.181007 | 1.362459  | -0.184801 |
| C  | -1.047785 | 2.279644  | -0.785678 |
| C  | 0.823836  | 1.872338  | 0.645776  |
| C  | -0.924710 | 3.651816  | -0.553935 |
| H  | -1.841468 | 1.938697  | -1.463131 |
| C  | 0.945285  | 3.242764  | 0.878539  |
| H  | 1.553811  | 1.202396  | 1.117029  |
| H  | -1.617863 | 4.345276  | -1.045647 |
| H  | 1.743795  | 3.609297  | 1.535325  |
| C  | 0.068691  | 4.160830  | 0.287939  |
| C  | 0.180694  | 5.629404  | 0.565253  |
| H  | 0.885657  | -1.286490 | -2.294267 |
| H  | 0.013501  | 0.212489  | -2.772073 |
| N  | 1.898315  | 0.523815  | -2.011064 |
| C  | 1.907876  | 1.855168  | -2.568524 |
| H  | 2.784909  | 2.004828  | -3.222400 |
| H  | 1.008154  | 2.001005  | -3.179941 |
| H  | 1.923040  | 2.642718  | -1.790839 |

|   |           |           |           |
|---|-----------|-----------|-----------|
| C | 2.968764  | 0.123397  | -1.226942 |
| C | 4.077621  | 0.968244  | -1.009235 |
| C | 2.984748  | -1.136901 | -0.594711 |
| C | 5.132309  | 0.567752  | -0.196338 |
| H | 4.114272  | 1.962154  | -1.459891 |
| C | 4.051399  | -1.513592 | 0.214880  |
| H | 2.147665  | -1.831186 | -0.710287 |
| C | 5.151169  | -0.679047 | 0.438488  |
| H | 5.969498  | 1.258825  | -0.042037 |
| H | 4.017433  | -2.496565 | 0.701129  |
| C | 6.302696  | -1.106872 | 1.296457  |
| H | 5.984785  | -1.816009 | 2.077008  |
| H | 7.088514  | -1.612272 | 0.707209  |
| H | 6.781025  | -0.247213 | 1.792089  |
| H | -0.374799 | 5.912644  | 1.476612  |
| H | 1.227143  | 5.934212  | 0.723928  |
| H | -0.230161 | 6.231183  | -0.260259 |
| H | -6.220987 | 0.523401  | -0.817998 |
| H | -2.523999 | 0.195551  | 5.079367  |
| C | 1.033437  | -1.371796 | 2.481033  |
| H | 0.975426  | -2.335058 | 1.946259  |
| H | 1.652906  | -0.713093 | 1.848473  |
| H | 1.550969  | -1.515164 | 3.438863  |
| C | -2.397368 | -0.909046 | -3.068147 |
| H | -1.875158 | -0.048293 | -3.519385 |
| H | -1.647950 | -1.678998 | -2.830549 |
| H | -3.090721 | -1.297341 | -3.827035 |

5e-s

Geometry with 60 atoms:

Thermal correction to Gibbs Free Energy: 0.41154

Total energy: -5329.434422870

|    |           |           |           |
|----|-----------|-----------|-----------|
| C  | -1.087935 | -0.488992 | 1.838733  |
| C  | 3.045310  | -0.149600 | 0.403480  |
| C  | 4.381501  | 0.049106  | 0.813874  |
| C  | 4.638971  | 0.025461  | 2.199864  |
| C  | 3.600031  | -0.196249 | 3.078980  |
| C  | 2.303796  | -0.381749 | 2.569760  |
| C  | 2.728465  | -0.152508 | -0.997837 |
| C  | 3.749050  | 0.045180  | -1.952714 |
| C  | 3.370087  | 0.017281  | -3.311007 |
| C  | 2.049546  | -0.201917 | -3.645987 |
| C  | 1.108310  | -0.387328 | -2.619493 |
| H  | 3.765475  | -0.228872 | 4.157351  |
| H  | 1.726992  | -0.233276 | -4.688381 |
| N  | 2.033461  | -0.350162 | 1.276844  |
| N  | 1.443253  | -0.359981 | -1.343781 |
| Br | 0.251646  | -2.988989 | 0.088243  |
| Ni | 0.179824  | -0.529022 | 0.295790  |

|   |           |           |           |
|---|-----------|-----------|-----------|
| C | -0.260390 | 1.330014  | 0.116924  |
| C | 0.429939  | 2.371113  | 0.739466  |
| C | -1.273532 | 1.663432  | -0.790623 |
| C | 0.117219  | 3.705549  | 0.464103  |
| H | 1.223935  | 2.157543  | 1.467202  |
| C | -1.583144 | 2.995695  | -1.065378 |
| H | -1.854441 | 0.873662  | -1.287163 |
| H | 0.668774  | 4.505897  | 0.972698  |
| H | -2.384110 | 3.230413  | -1.777446 |
| C | -0.890298 | 4.043452  | -0.444865 |
| C | -1.206070 | 5.473647  | -0.764709 |
| H | -1.217170 | -1.576771 | 1.966937  |
| H | -0.480711 | -0.087320 | 2.663725  |
| N | -2.331664 | 0.184936  | 1.811042  |
| C | -2.449119 | 1.469560  | 2.458321  |
| H | -3.326174 | 1.502548  | 3.128796  |
| H | -1.555854 | 1.653952  | 3.068618  |
| H | -2.543102 | 2.300015  | 1.732839  |
| C | -3.346146 | -0.224727 | 0.959662  |
| C | -4.536607 | 0.520217  | 0.828790  |
| C | -3.223812 | -1.389350 | 0.172542  |
| C | -5.543992 | 0.112019  | -0.039390 |
| H | -4.681790 | 1.439611  | 1.399568  |
| C | -4.244530 | -1.774411 | -0.689678 |
| H | -2.312744 | -1.993469 | 0.209776  |
| C | -5.430639 | -1.042938 | -0.819358 |
| H | -6.451301 | 0.722811  | -0.117038 |
| H | -4.106941 | -2.679982 | -1.292845 |
| C | -6.531819 | -1.488091 | -1.732967 |
| H | -6.137843 | -2.018455 | -2.614493 |
| H | -7.227933 | -2.182447 | -1.229373 |
| H | -7.133218 | -0.636622 | -2.088675 |
| H | -0.680916 | 5.810508  | -1.675833 |
| H | -2.282421 | 5.620789  | -0.947316 |
| H | -0.901819 | 6.149049  | 0.049848  |
| H | 5.660419  | 0.177773  | 2.560363  |
| H | 4.130007  | 0.166979  | -4.083525 |
| H | 1.464470  | -0.561537 | 3.251369  |
| H | 0.050183  | -0.565579 | -2.847747 |
| C | 5.397010  | 0.256615  | -0.176713 |
| C | 5.094037  | 0.255020  | -1.504452 |
| H | 6.425417  | 0.412989  | 0.161410  |
| H | 5.873349  | 0.410474  | -2.255997 |

5f-s

Geometry with 64 atoms:

Thermal correction to Gibbs Free Energy: 0.446059

Total energy: -5331.837358310

|   |          |          |           |
|---|----------|----------|-----------|
| C | 1.020300 | 0.039904 | -2.122302 |
|---|----------|----------|-----------|

|    |           |           |           |
|----|-----------|-----------|-----------|
| C  | -2.975219 | 0.040967  | -0.155594 |
| C  | -4.301992 | 0.408725  | -0.373961 |
| C  | -4.713787 | 0.824932  | -1.641863 |
| C  | -3.748542 | 0.845205  | -2.654476 |
| C  | -2.444830 | 0.471784  | -2.360532 |
| C  | -2.472681 | -0.451998 | 1.145438  |
| C  | -3.266309 | -0.597589 | 2.283410  |
| C  | -2.712068 | -1.109060 | 3.459004  |
| C  | -1.356994 | -1.462273 | 3.434802  |
| C  | -0.629878 | -1.285237 | 2.267457  |
| H  | -5.028851 | 0.371920  | 0.441774  |
| H  | -4.011589 | 1.155486  | -3.669664 |
| H  | -1.673498 | 0.483030  | -3.139507 |
| H  | -4.322539 | -0.315887 | 2.265730  |
| H  | -0.872362 | -1.872309 | 4.325397  |
| H  | 0.432141  | -1.556922 | 2.209087  |
| N  | -2.063453 | 0.091517  | -1.142707 |
| N  | -1.174863 | -0.786863 | 1.160546  |
| Br | -0.370242 | -2.785321 | -1.189168 |
| Ni | -0.136207 | -0.418933 | -0.561614 |
| C  | 0.381917  | 1.304045  | 0.130410  |
| C  | -0.253221 | 2.501685  | -0.210161 |
| C  | 1.384866  | 1.361334  | 1.108774  |
| C  | 0.097141  | 3.709239  | 0.401975  |
| H  | -1.038724 | 2.517376  | -0.977282 |
| C  | 1.737169  | 2.567121  | 1.717163  |
| H  | 1.921983  | 0.451453  | 1.409381  |
| H  | -0.417884 | 4.632803  | 0.109005  |
| H  | 2.529196  | 2.578590  | 2.476795  |
| C  | 1.095959  | 3.766190  | 1.379200  |
| C  | -6.128895 | 1.204198  | -1.914665 |
| H  | -6.187861 | 2.056262  | -2.609189 |
| H  | -6.663502 | 0.365526  | -2.393235 |
| H  | -6.669133 | 1.456954  | -0.990737 |
| C  | -3.534373 | -1.298383 | 4.687849  |
| H  | -4.465587 | -0.714607 | 4.650622  |
| H  | -3.810797 | -2.360587 | 4.803770  |
| H  | -2.972033 | -1.017047 | 5.591655  |
| C  | 1.454760  | 5.051993  | 2.059022  |
| H  | 1.100878  | -0.961410 | -2.578906 |
| H  | 0.402906  | 0.683558  | -2.767454 |
| N  | 2.298873  | 0.641566  | -1.953041 |
| C  | 2.480590  | 2.027693  | -2.306779 |
| H  | 3.391164  | 2.171694  | -2.915576 |
| H  | 1.627064  | 2.367791  | -2.908168 |
| H  | 2.564142  | 2.691408  | -1.423999 |
| C  | 3.261415  | 0.021885  | -1.178079 |
| C  | 4.455192  | 0.683942  | -0.817710 |
| C  | 3.071833  | -1.284615 | -0.675027 |

|   |          |           |           |
|---|----------|-----------|-----------|
| C | 5.388873 | 0.073619  | 0.013301  |
| H | 4.653754 | 1.698997  | -1.169082 |
| C | 4.020584 | -1.871188 | 0.156512  |
| H | 2.163721 | -1.848986 | -0.911164 |
| C | 5.200153 | -1.214581 | 0.526558  |
| H | 6.297289 | 0.627222  | 0.280430  |
| H | 3.829875 | -2.882161 | 0.537684  |
| C | 6.222718 | -1.868742 | 1.403622  |
| H | 5.762069 | -2.593409 | 2.094298  |
| H | 6.975017 | -2.424997 | 0.815152  |
| H | 6.775534 | -1.129345 | 2.005478  |
| H | 0.951384 | 5.147863  | 3.037779  |
| H | 2.537380 | 5.121135  | 2.253915  |
| H | 1.159162 | 5.926655  | 1.458403  |

#### 5f'-s

Geometry with 64 atoms:

Thermal correction to Gibbs Free Energy: 0.449107

Total energy: -5331.836808220

|    |           |           |           |
|----|-----------|-----------|-----------|
| Ni | -0.876678 | -0.360017 | -0.302166 |
| C  | -2.696798 | -0.743168 | 0.186016  |
| C  | -5.507149 | -1.188909 | 0.336320  |
| C  | -3.265922 | -1.410452 | 1.268187  |
| C  | -3.561278 | -0.306784 | -0.828894 |
| C  | -4.937163 | -0.522491 | -0.756356 |
| C  | -4.644304 | -1.632493 | 1.342435  |
| H  | -2.640133 | -1.786935 | 2.088820  |
| H  | -3.160795 | 0.214979  | -1.710854 |
| H  | -5.586242 | -0.169222 | -1.567433 |
| H  | -5.060657 | -2.167127 | 2.205361  |
| N  | -1.049358 | 1.771816  | -0.220226 |
| C  | -0.899753 | 4.539901  | 0.164068  |
| C  | -2.089254 | 2.451365  | 0.265428  |
| C  | 0.083573  | 2.433433  | -0.504516 |
| C  | 0.185176  | 3.813513  | -0.330827 |
| C  | -2.060074 | 3.822500  | 0.474953  |
| N  | 0.951314  | 0.273847  | -1.066324 |
| C  | 3.507368  | 1.264892  | -1.653024 |
| C  | 1.923115  | -0.537533 | -1.490207 |
| C  | 1.210091  | 1.591845  | -0.965959 |
| C  | 2.469887  | 2.112267  | -1.252710 |
| C  | 3.202254  | -0.089247 | -1.792144 |
| H  | -2.983604 | 1.862705  | 0.501081  |
| H  | 1.115041  | 4.336842  | -0.566434 |
| H  | -2.938541 | 4.330945  | 0.881423  |
| H  | 1.646092  | -1.591683 | -1.595066 |
| H  | 2.661939  | 3.183810  | -1.158476 |
| H  | 3.963355  | -0.804107 | -2.118443 |
| Br | -0.740868 | -2.628304 | -1.461455 |

|   |           |           |           |
|---|-----------|-----------|-----------|
| C | 4.887683  | 1.778909  | -1.883160 |
| H | 4.893629  | 2.853583  | -2.114880 |
| H | 5.494726  | 1.633346  | -0.972520 |
| H | 5.391673  | 1.233337  | -2.694498 |
| C | -0.829669 | 6.019239  | 0.339720  |
| H | -1.409589 | 6.347150  | 1.214908  |
| H | 0.207233  | 6.368583  | 0.445943  |
| H | -1.260109 | 6.527282  | -0.539791 |
| C | -0.419639 | -0.557490 | 1.622992  |
| N | 0.834030  | -0.019224 | 1.947748  |
| H | -1.208429 | -0.054452 | 2.196552  |
| H | -0.474671 | -1.649786 | 1.749449  |
| C | 2.030094  | -0.695723 | 1.703949  |
| C | 0.895977  | 1.323802  | 2.478571  |
| C | 3.272038  | -0.077045 | 1.941400  |
| C | 2.046402  | -2.012639 | 1.205074  |
| H | -0.121895 | 1.714390  | 2.608611  |
| H | 1.399131  | 1.345169  | 3.460946  |
| H | 1.442419  | 2.015092  | 1.810339  |
| C | 4.463862  | -0.743940 | 1.674831  |
| H | 3.322783  | 0.942067  | 2.329493  |
| C | 3.248129  | -2.663212 | 0.955523  |
| H | 1.113983  | -2.525387 | 0.956162  |
| C | 4.486038  | -2.047442 | 1.170841  |
| H | 5.411149  | -0.226461 | 1.866222  |
| H | 3.219607  | -3.684640 | 0.558339  |
| C | 5.772111  | -2.736737 | 0.833833  |
| H | 6.060512  | -2.559093 | -0.217781 |
| H | 6.603668  | -2.375105 | 1.458522  |
| H | 5.695157  | -3.827734 | 0.962709  |
| C | -6.989056 | -1.396749 | 0.425886  |
| H | -7.243975 | -2.202585 | 1.131390  |
| H | -7.506798 | -0.485664 | 0.773994  |
| H | -7.423652 | -1.650926 | -0.554292 |

#### 5g-s

Geometry with 56 atoms:

Thermal correction to Gibbs Free Energy: 0.384469

Total energy: -5251.286347320

|    |           |           |           |
|----|-----------|-----------|-----------|
| Ni | -0.581233 | -0.432552 | -0.223775 |
| N  | -1.827510 | -0.192260 | 1.457910  |
| C  | -3.041639 | 0.032934  | 1.140010  |
| C  | -1.788900 | -0.351029 | 2.902984  |
| C  | -3.228526 | -0.040421 | 3.339278  |
| H  | -1.473866 | -1.381661 | 3.140362  |
| H  | -3.706994 | -0.844084 | 3.915834  |
| N  | -2.429590 | 0.025427  | -1.134991 |
| C  | -3.037369 | 0.119371  | -2.454996 |
| C  | -3.372497 | 0.150436  | -0.283214 |

|    |           |           |           |
|----|-----------|-----------|-----------|
| C  | -4.519600 | 0.393050  | -2.156213 |
| H  | -2.563249 | 0.923934  | -3.041139 |
| H  | -5.204651 | -0.365647 | -2.559892 |
| O  | -3.956633 | 0.109398  | 2.088651  |
| O  | -4.606324 | 0.346779  | -0.705074 |
| H  | -1.047835 | 0.331887  | 3.348566  |
| H  | -3.323449 | 0.903981  | 3.896125  |
| H  | -2.871366 | -0.824504 | -3.001414 |
| H  | -4.858273 | 1.388090  | -2.480008 |
| C  | 0.110571  | 1.340501  | 0.014162  |
| C  | 1.119306  | 1.518835  | 0.971875  |
| C  | 1.604851  | 2.790285  | 1.280094  |
| H  | 1.547368  | 0.651312  | 1.494372  |
| C  | 0.086240  | 3.753665  | -0.301885 |
| C  | 1.094818  | 3.934113  | 0.649827  |
| H  | 2.396536  | 2.901981  | 2.032013  |
| H  | -0.328266 | 4.631018  | -0.814090 |
| C  | 1.610853  | 5.296005  | 1.001521  |
| H  | 1.307283  | 5.594467  | 2.020474  |
| H  | 2.713091  | 5.330902  | 0.981582  |
| H  | 1.235500  | 6.065094  | 0.308633  |
| C  | -0.397993 | 2.478920  | -0.613773 |
| Br | -0.930798 | -2.855694 | -0.061236 |
| H  | -1.183832 | 2.386987  | -1.375591 |
| C  | 0.574978  | -0.506910 | -1.844255 |
| H  | 0.581388  | -1.601213 | -1.978764 |
| H  | -0.056643 | -0.042448 | -2.616764 |
| N  | 1.878292  | 0.039554  | -1.900340 |
| C  | 2.091198  | 1.290137  | -2.587488 |
| H  | 2.264866  | 2.137153  | -1.895974 |
| H  | 2.960189  | 1.229767  | -3.266395 |
| H  | 1.210903  | 1.525770  | -3.200061 |
| C  | 2.879329  | -0.445426 | -1.074304 |
| C  | 4.126505  | 0.205398  | -0.971785 |
| C  | 2.680979  | -1.591759 | -0.274061 |
| C  | 5.114236  | -0.272436 | -0.115687 |
| H  | 4.331397  | 1.106947  | -1.553442 |
| C  | 3.683857  | -2.048135 | 0.574147  |
| H  | 1.724378  | -2.123664 | -0.285657 |
| C  | 4.924836  | -1.408315 | 0.678143  |
| H  | 6.067290  | 0.267116  | -0.058337 |
| H  | 3.487845  | -2.935982 | 1.187848  |
| C  | 6.001911  | -1.928136 | 1.579243  |
| H  | 5.583497  | -2.397978 | 2.484170  |
| H  | 6.619580  | -2.696954 | 1.080409  |
| H  | 6.687391  | -1.126465 | 1.897677  |

5h-s

Geometry with 67 atoms:

Thermal correction to Gibbs Free Energy: 0.466346

Total energy: -5500.244669510

|    |           |           |           |
|----|-----------|-----------|-----------|
| C  | -3.298511 | 1.194643  | 2.712509  |
| C  | -2.435528 | 1.195364  | 1.613112  |
| N  | -2.269656 | 0.097024  | 0.872035  |
| C  | -2.935871 | -1.029743 | 1.142869  |
| C  | -3.817240 | -1.100906 | 2.224026  |
| C  | -3.989072 | 0.027805  | 3.017046  |
| C  | -1.676632 | 2.384624  | 1.164192  |
| C  | -2.673802 | -2.159800 | 0.223423  |
| C  | -3.380220 | -3.362991 | 0.284854  |
| C  | -3.080967 | -4.368366 | -0.627446 |
| C  | -2.090801 | -4.144425 | -1.577797 |
| C  | -1.434399 | -2.917014 | -1.568496 |
| N  | -0.874804 | 2.201421  | 0.105170  |
| N  | -1.710874 | -1.956632 | -0.691271 |
| C  | -0.217330 | 3.241814  | -0.394385 |
| C  | -0.294631 | 4.521866  | 0.147366  |
| C  | -1.102864 | 4.715202  | 1.262644  |
| C  | -1.810006 | 3.634455  | 1.776005  |
| Ni | -0.779064 | 0.023286  | -0.559749 |
| H  | -3.432066 | 2.087523  | 3.325123  |
| H  | -4.357838 | -2.021014 | 2.451414  |
| H  | -4.666018 | -0.001337 | 3.873755  |
| H  | -4.162155 | -3.514802 | 1.031069  |
| H  | -3.622789 | -5.316711 | -0.597039 |
| H  | -1.826616 | -4.902305 | -2.317808 |
| H  | -0.651770 | -2.700844 | -2.304369 |
| H  | 0.406409  | 3.046023  | -1.272347 |
| H  | 0.269652  | 5.342642  | -0.299833 |
| H  | -1.191442 | 5.700703  | 1.726286  |
| H  | -2.464353 | 3.768989  | 2.639267  |
| C  | 0.571776  | -0.376049 | 0.795750  |
| C  | 1.518993  | 0.584091  | 1.171256  |
| C  | 0.600839  | -1.593474 | 1.484651  |
| C  | 2.444472  | 0.346431  | 2.185433  |
| H  | 1.573086  | 1.541428  | 0.638460  |
| C  | 1.529855  | -1.837666 | 2.501159  |
| H  | -0.102902 | -2.396731 | 1.229785  |
| C  | 2.474672  | -0.875105 | 2.867228  |
| H  | 3.181598  | 1.119976  | 2.438420  |
| H  | 1.524199  | -2.806364 | 3.016793  |
| C  | 3.516678  | -1.149936 | 3.908880  |
| H  | 4.490707  | -1.391745 | 3.446145  |
| H  | 3.686168  | -0.275933 | 4.558550  |
| H  | 3.241536  | -2.002934 | 4.548431  |
| C  | 0.718446  | -0.474581 | -1.804787 |
| H  | 0.105047  | -0.478456 | -2.719995 |
| H  | 0.974419  | -1.504923 | -1.529570 |

|    |           |           |           |
|----|-----------|-----------|-----------|
| N  | 1.871965  | 0.315533  | -1.996573 |
| C  | 3.111662  | 0.010702  | -1.445188 |
| C  | 3.364902  | -1.211923 | -0.788120 |
| C  | 4.183831  | 0.921430  | -1.526396 |
| C  | 4.599775  | -1.478176 | -0.217565 |
| H  | 2.577445  | -1.960277 | -0.686776 |
| C  | 5.416266  | 0.636620  | -0.941298 |
| H  | 4.062917  | 1.878506  | -2.037876 |
| C  | 5.657249  | -0.559692 | -0.262900 |
| H  | 4.744700  | -2.436795 | 0.296188  |
| H  | 6.218790  | 1.379661  | -1.018825 |
| C  | 6.969191  | -0.849927 | 0.400043  |
| H  | 6.904386  | -0.745451 | 1.497684  |
| H  | 7.306424  | -1.880919 | 0.202938  |
| H  | 7.758495  | -0.164088 | 0.055518  |
| C  | 1.747083  | 1.489021  | -2.826609 |
| H  | 0.703003  | 1.583666  | -3.158746 |
| H  | 2.019780  | 2.417175  | -2.291409 |
| H  | 2.396715  | 1.430610  | -3.719543 |
| Br | -2.288488 | 0.784730  | -2.479514 |

TS5a,1a'

Geometry with 58 atoms:

Thermal correction to Gibbs Free Energy: 0.398696

Total energy: -5253.221580630

|    |           |           |           |
|----|-----------|-----------|-----------|
| C  | -0.821820 | -0.253626 | 1.629872  |
| C  | 3.359179  | -0.543206 | 0.528977  |
| C  | 4.593788  | -0.688808 | 1.163478  |
| C  | 4.636790  | -1.212008 | 2.450647  |
| C  | 3.448466  | -1.584985 | 3.070347  |
| C  | 2.258332  | -1.404295 | 2.374466  |
| C  | 3.214890  | -0.032684 | -0.852160 |
| C  | 4.276472  | 0.464955  | -1.611045 |
| C  | 4.026786  | 0.906101  | -2.906147 |
| C  | 2.732016  | 0.837792  | -3.413438 |
| C  | 1.730355  | 0.332309  | -2.591502 |
| H  | 5.517261  | -0.407345 | 0.654358  |
| H  | 3.435971  | -2.010468 | 4.075392  |
| H  | 1.300674  | -1.688554 | 2.825070  |
| H  | 5.286075  | 0.515987  | -1.199286 |
| H  | 2.497827  | 1.171530  | -4.426160 |
| H  | 0.690755  | 0.258021  | -2.934796 |
| N  | 2.212470  | -0.887894 | 1.146316  |
| N  | 1.971505  | -0.086424 | -1.352958 |
| Br | -0.041353 | -2.808816 | -0.936682 |
| Ni | 0.499169  | -0.584570 | 0.027390  |
| C  | 0.008849  | 1.213163  | 0.404087  |
| C  | 0.818347  | 2.116154  | 1.101369  |
| C  | -0.885225 | 1.725426  | -0.549422 |

|   |           |           |           |
|---|-----------|-----------|-----------|
| C | 0.764317  | 3.481547  | 0.825047  |
| H | 1.505757  | 1.753108  | 1.876635  |
| C | -0.925694 | 3.090222  | -0.828417 |
| H | -1.564659 | 1.047161  | -1.083323 |
| H | 1.410061  | 4.169699  | 1.383543  |
| H | -1.622073 | 3.465186  | -1.587911 |
| C | -0.099451 | 3.995700  | -0.150270 |
| C | -0.129312 | 5.459718  | -0.468169 |
| H | -0.907896 | -1.354695 | 1.553272  |
| H | -0.193872 | -0.018619 | 2.500757  |
| N | -2.101296 | 0.332195  | 1.797148  |
| C | -2.185024 | 1.557950  | 2.555223  |
| H | -3.055032 | 1.543228  | 3.232646  |
| H | -1.284391 | 1.667696  | 3.173563  |
| H | -2.266563 | 2.455510  | 1.910845  |
| C | -3.186266 | -0.036099 | 1.009343  |
| C | -4.369561 | 0.729376  | 0.993900  |
| C | -3.150989 | -1.181896 | 0.189687  |
| C | -5.458704 | 0.347762  | 0.214480  |
| H | -4.449887 | 1.642361  | 1.587018  |
| C | -4.247961 | -1.538604 | -0.584790 |
| H | -2.250547 | -1.796891 | 0.123528  |
| C | -5.433081 | -0.793436 | -0.591327 |
| H | -6.359751 | 0.972308  | 0.229483  |
| H | -4.171147 | -2.432321 | -1.216367 |
| C | -6.616909 | -1.210250 | -1.409877 |
| H | -6.310173 | -1.657956 | -2.368794 |
| H | -7.229555 | -1.967448 | -0.888965 |
| H | -7.278955 | -0.357884 | -1.628751 |
| H | 0.569729  | 5.710033  | -1.285727 |
| H | -1.129737 | 5.784317  | -0.794617 |
| H | 0.162867  | 6.070388  | 0.400235  |
| H | 4.842682  | 1.302100  | -3.515594 |
| H | 5.594899  | -1.334701 | 2.961197  |

TS5b,1b'

Geometry with 82 atoms:

Thermal correction to Gibbs Free Energy: 0.608399

Total energy: -5567.605717340

|   |           |           |           |
|---|-----------|-----------|-----------|
| C | -1.876787 | -1.338825 | 1.081881  |
| C | 2.174155  | -0.882427 | -0.169505 |
| C | 3.424754  | -1.419219 | 0.114285  |
| C | 3.544848  | -2.720347 | 0.619419  |
| C | 2.355663  | -3.430290 | 0.805095  |
| C | 1.139999  | -2.828079 | 0.499003  |
| C | 1.979838  | 0.476669  | -0.720315 |
| C | 2.945376  | 1.475169  | -0.651853 |
| C | 2.671299  | 2.758253  | -1.143686 |
| C | 1.416944  | 2.951583  | -1.730062 |



|    |           |           |           |
|----|-----------|-----------|-----------|
| C  | 0.505491  | 1.900964  | -1.761708 |
| H  | 4.317843  | -0.819856 | -0.081256 |
| H  | 2.352008  | -4.453184 | 1.184301  |
| H  | 0.200719  | -3.377096 | 0.634541  |
| H  | 3.904327  | 1.262537  | -0.171794 |
| H  | 1.123599  | 3.914972  | -2.149877 |
| H  | -0.494834 | 2.039164  | -2.191216 |
| N  | 1.043122  | -1.584905 | 0.035980  |
| N  | 0.770350  | 0.700962  | -1.259565 |
| Br | -1.399263 | -1.799957 | -2.544372 |
| Ni | -0.695778 | -0.609258 | -0.488875 |
| C  | -1.010666 | 0.577782  | 0.964488  |
| C  | -0.062690 | 0.832617  | 1.960735  |
| C  | -1.925578 | 1.592179  | 0.647215  |
| C  | 0.013841  | 2.085178  | 2.568259  |
| H  | 0.642582  | 0.047173  | 2.262721  |
| C  | -1.841306 | 2.844194  | 1.254482  |
| H  | -2.712765 | 1.408624  | -0.096244 |
| H  | 0.776237  | 2.266390  | 3.335494  |
| H  | -2.553621 | 3.629155  | 0.973777  |
| C  | -0.861874 | 3.120714  | 2.216879  |
| C  | -0.743821 | 4.480669  | 2.834573  |
| H  | -2.058791 | -2.148942 | 0.350119  |
| H  | -1.170775 | -1.708590 | 1.838771  |
| N  | -3.088903 | -0.953913 | 1.704597  |
| C  | -3.027730 | -0.479438 | 3.066730  |
| H  | -3.841109 | -0.912223 | 3.672876  |
| H  | -2.076293 | -0.788220 | 3.519119  |
| H  | -3.096966 | 0.624056  | 3.138320  |
| C  | -4.246085 | -0.719403 | 0.970951  |
| C  | -5.372522 | -0.112441 | 1.562114  |
| C  | -4.343071 | -1.066463 | -0.391993 |
| C  | -6.534249 | 0.109387  | 0.827483  |
| H  | -5.351223 | 0.203247  | 2.606902  |
| C  | -5.511800 | -0.829763 | -1.105468 |
| H  | -3.492214 | -1.500795 | -0.922920 |
| C  | -6.640819 | -0.244627 | -0.520088 |
| H  | -7.387168 | 0.586188  | 1.324841  |
| H  | -5.539342 | -1.106234 | -2.166653 |
| C  | -7.902438 | -0.024457 | -1.297929 |
| H  | -7.691947 | 0.241379  | -2.346277 |
| H  | -8.532948 | -0.931057 | -1.321901 |
| H  | -8.514066 | 0.779447  | -0.859324 |
| H  | -0.083393 | 5.136432  | 2.239582  |
| H  | -1.720513 | 4.985427  | 2.897587  |
| H  | -0.316353 | 4.431936  | 3.848166  |
| C  | 3.701374  | 3.868114  | -0.990381 |
| C  | 3.230007  | 5.174453  | -1.620033 |
| H  | 4.004805  | 5.947107  | -1.489935 |

|   |          |           |           |
|---|----------|-----------|-----------|
| H | 3.046931 | 5.067709  | -2.702295 |
| H | 2.307351 | 5.550727  | -1.147573 |
| C | 3.935386 | 4.102544  | 0.506391  |
| H | 4.329202 | 3.205769  | 1.011435  |
| H | 4.665747 | 4.916147  | 0.651201  |
| H | 2.997791 | 4.391490  | 1.011294  |
| C | 5.010776 | 3.444532  | -1.662464 |
| H | 4.861199 | 3.259165  | -2.739350 |
| H | 5.762657 | 4.244239  | -1.556445 |
| H | 5.434977 | 2.531010  | -1.216039 |
| C | 4.920024 | -3.295089 | 0.927683  |
| C | 4.833953 | -4.717353 | 1.470644  |
| H | 4.374036 | -5.408953 | 0.745299  |
| H | 5.847862 | -5.091549 | 1.685281  |
| H | 4.258311 | -4.765952 | 2.409949  |
| C | 5.752260 | -3.310522 | -0.358653 |
| H | 5.272929 | -3.932475 | -1.133080 |
| H | 5.897006 | -2.300574 | -0.774637 |
| H | 6.750643 | -3.731533 | -0.153500 |
| C | 5.601740 | -2.410109 | 1.976429  |
| H | 5.739222 | -1.375476 | 1.623371  |
| H | 5.013622 | -2.376424 | 2.908861  |
| H | 6.598982 | -2.814543 | 2.217325  |

TS5c,1c'

Geometry with 66 atoms:

Thermal correction to Gibbs Free Energy: 0.457927

Total energy: -5482.247991520

|    |           |           |           |
|----|-----------|-----------|-----------|
| C  | -1.360953 | -1.425634 | 0.931114  |
| C  | 2.781345  | -0.770140 | -0.049808 |
| C  | 4.016846  | -1.306058 | 0.276071  |
| C  | 4.095513  | -2.620485 | 0.758317  |
| C  | 2.909048  | -3.352872 | 0.886384  |
| C  | 1.718375  | -2.728599 | 0.539737  |
| C  | 2.620067  | 0.598530  | -0.593780 |
| C  | 3.661762  | 1.509614  | -0.682914 |
| C  | 3.414035  | 2.783140  | -1.215524 |
| C  | 2.116366  | 3.087481  | -1.647083 |
| C  | 1.140721  | 2.107569  | -1.513996 |
| H  | 4.943257  | -0.740893 | 0.156922  |
| H  | 2.890880  | -4.383261 | 1.243158  |
| H  | 0.774860  | -3.279289 | 0.629075  |
| H  | 4.673084  | 1.276992  | -0.343373 |
| H  | 1.854051  | 4.056477  | -2.073611 |
| H  | 0.109734  | 2.305292  | -1.833977 |
| N  | 1.638492  | -1.476008 | 0.094887  |
| N  | 1.376578  | 0.903592  | -1.005935 |
| Br | -0.722439 | -1.195215 | -2.718739 |
| Ni | -0.088357 | -0.459140 | -0.427753 |

|   |           |           |           |
|---|-----------|-----------|-----------|
| C | -0.554640 | 0.489937  | 1.148328  |
| C | 0.282304  | 0.613790  | 2.262521  |
| C | -1.471921 | 1.520048  | 0.891715  |
| C | 0.233165  | 1.751014  | 3.067173  |
| H | 0.989851  | -0.188375 | 2.510275  |
| C | -1.508391 | 2.659198  | 1.694217  |
| H | -2.173083 | 1.432917  | 0.050700  |
| H | 0.901721  | 1.827367  | 3.933071  |
| H | -2.223292 | 3.458401  | 1.464735  |
| C | -0.653739 | 2.800439  | 2.794964  |
| C | -0.676338 | 4.036882  | 3.641307  |
| H | -1.456396 | -2.124563 | 0.077478  |
| H | -0.706598 | -1.890860 | 1.681820  |
| N | -2.631254 | -1.167605 | 1.506627  |
| C | -2.681560 | -0.884240 | 2.921168  |
| H | -3.545981 | -1.382672 | 3.390493  |
| H | -1.773660 | -1.269493 | 3.403955  |
| H | -2.749653 | 0.199760  | 3.140793  |
| C | -3.739281 | -0.852004 | 0.728205  |
| C | -4.902471 | -0.300864 | 1.302587  |
| C | -3.747933 | -1.061244 | -0.665198 |
| C | -6.012276 | 0.004666  | 0.518713  |
| H | -4.949292 | -0.091388 | 2.373004  |
| C | -4.864354 | -0.741676 | -1.427736 |
| H | -2.865979 | -1.449455 | -1.179366 |
| C | -6.028454 | -0.207410 | -0.862234 |
| H | -6.895648 | 0.435867  | 1.004476  |
| H | -4.820312 | -0.909036 | -2.511145 |
| C | -7.233628 | 0.104980  | -1.696053 |
| H | -6.951446 | 0.475955  | -2.694435 |
| H | -7.864062 | -0.787644 | -1.856810 |
| H | -7.871118 | 0.865401  | -1.218413 |
| H | 0.018463  | 4.803653  | 3.255142  |
| H | -1.676941 | 4.496241  | 3.663582  |
| H | -0.373152 | 3.825332  | 4.678582  |
| O | 4.448718  | 3.618787  | -1.268734 |
| O | 5.308383  | -3.077565 | 1.052825  |
| C | 4.257806  | 4.918437  | -1.788071 |
| H | 5.227019  | 5.427445  | -1.731461 |
| H | 3.929897  | 4.885742  | -2.840492 |
| H | 3.519683  | 5.482753  | -1.193934 |
| C | 5.449360  | -4.398974 | 1.534089  |
| H | 5.091284  | -5.134098 | 0.794462  |
| H | 6.519506  | -4.559104 | 1.708856  |
| H | 4.904520  | -4.539804 | 2.482309  |

Total energy: -5331.835734960

|    |           |           |           |
|----|-----------|-----------|-----------|
| C  | 0.727737  | -0.405659 | -1.923616 |
| C  | -3.137012 | -0.154287 | 0.436789  |
| C  | -4.503277 | 0.080930  | 0.298281  |
| C  | -5.158042 | -0.427513 | -0.818168 |
| C  | -4.438378 | -1.162972 | -1.748903 |
| C  | -3.065870 | -1.358650 | -1.558840 |
| C  | -2.365409 | 0.313281  | 1.611233  |
| C  | -2.874492 | 1.213231  | 2.546791  |
| C  | -2.078414 | 1.558612  | 3.633975  |
| C  | -0.819296 | 0.987221  | 3.767164  |
| C  | -0.359608 | 0.106324  | 2.783030  |
| H  | -5.055345 | 0.636350  | 1.058035  |
| H  | -4.924596 | -1.589881 | -2.629421 |
| H  | -3.869337 | 1.646423  | 2.430444  |
| H  | -0.181196 | 1.221017  | 4.622972  |
| N  | -2.443739 | -0.846826 | -0.487904 |
| N  | -1.126247 | -0.192324 | 1.725761  |
| Br | 0.112130  | -3.208052 | 0.273009  |
| Ni | -0.400650 | -0.771133 | -0.150705 |
| C  | -0.205847 | 1.047153  | -0.761732 |
| C  | -1.197576 | 1.713433  | -1.493689 |
| C  | 0.645877  | 1.835082  | 0.029892  |
| C  | -1.381398 | 3.090559  | -1.377185 |
| H  | -1.857075 | 1.152277  | -2.168029 |
| C  | 0.451204  | 3.208241  | 0.154657  |
| H  | 1.480469  | 1.372952  | 0.569952  |
| H  | -2.173918 | 3.576502  | -1.958471 |
| H  | 1.117770  | 3.787403  | 0.804771  |
| C  | -0.575674 | 3.865288  | -0.535828 |
| C  | -0.803358 | 5.336422  | -0.369832 |
| H  | 0.914781  | -1.487927 | -1.801366 |
| H  | 0.062083  | -0.273249 | -2.785128 |
| N  | 1.944810  | 0.287827  | -2.144602 |
| C  | 1.916950  | 1.444627  | -3.008602 |
| H  | 2.803336  | 1.466730  | -3.663889 |
| H  | 1.029235  | 1.396104  | -3.653068 |
| H  | 1.879924  | 2.400292  | -2.449001 |
| C  | 3.025038  | 0.121973  | -1.285622 |
| C  | 4.108919  | 1.023810  | -1.295205 |
| C  | 3.075412  | -0.934520 | -0.353994 |
| C  | 5.177565  | 0.867407  | -0.418401 |
| H  | 4.119392  | 1.873246  | -1.980972 |
| C  | 4.151884  | -1.065798 | 0.517202  |
| H  | 2.263446  | -1.663699 | -0.282178 |
| C  | 5.231378  | -0.176576 | 0.510760  |
| H  | 5.996363  | 1.595753  | -0.452220 |
| H  | 4.142080  | -1.894857 | 1.235813  |
| C  | 6.396338  | -0.347292 | 1.437341  |

TS5d,1d'

Geometry with 64 atoms:

Thermal correction to Gibbs Free Energy: 0.453497

|   |           |           |           |
|---|-----------|-----------|-----------|
| H | 6.096770  | -0.834686 | 2.378548  |
| H | 7.186773  | -0.975999 | 0.990221  |
| H | 6.861782  | 0.619285  | 1.686945  |
| H | -1.434249 | 5.549401  | 0.511304  |
| H | 0.142773  | 5.880331  | -0.220648 |
| H | -1.314659 | 5.770165  | -1.243056 |
| H | -6.229438 | -0.259240 | -0.951795 |
| H | -2.446569 | 2.267177  | 4.380069  |
| C | 0.990315  | -0.522594 | 2.854432  |
| H | 0.921591  | -1.603889 | 2.652394  |
| H | 1.657203  | -0.109804 | 2.076366  |
| H | 1.463973  | -0.355103 | 3.831173  |
| C | -2.249723 | -2.112777 | -2.552618 |
| H | -1.726974 | -1.417862 | -3.232382 |
| H | -1.485709 | -2.723022 | -2.044981 |
| H | -2.882253 | -2.759117 | -3.176658 |

TS5e,1e'

Geometry with 60 atoms:

Thermal correction to Gibbs Free Energy: 0.412385

Total energy: -5329.422619840

|    |           |           |           |
|----|-----------|-----------|-----------|
| C  | -1.092647 | -0.138934 | 1.655526  |
| C  | 3.065155  | -0.499866 | 0.619097  |
| C  | 4.336197  | -0.488437 | 1.234044  |
| C  | 4.394508  | -0.824104 | 2.602218  |
| C  | 3.233071  | -1.150982 | 3.269807  |
| C  | 2.015337  | -1.124583 | 2.570607  |
| C  | 2.954073  | -0.189056 | -0.780500 |
| C  | 4.108893  | 0.141344  | -1.522465 |
| C  | 3.930136  | 0.432876  | -2.890780 |
| C  | 2.665215  | 0.378126  | -3.439387 |
| C  | 1.580716  | 0.031991  | -2.615186 |
| H  | 3.242126  | -1.424343 | 4.326487  |
| H  | 2.496067  | 0.595855  | -4.495752 |
| N  | 1.928639  | -0.799234 | 1.290762  |
| N  | 1.725932  | -0.239822 | -1.332422 |
| Br | -0.369380 | -2.836983 | -0.793619 |
| Ni | 0.229495  | -0.596045 | 0.089983  |
| C  | -0.244656 | 1.230070  | 0.322193  |
| C  | 0.559824  | 2.182796  | 0.955618  |
| C  | -1.131091 | 1.667523  | -0.673934 |
| C  | 0.505694  | 3.524159  | 0.578797  |
| H  | 1.242568  | 1.880526  | 1.760501  |
| C  | -1.171985 | 3.007826  | -1.053192 |
| H  | -1.804249 | 0.948638  | -1.160586 |
| H  | 1.146642  | 4.252970  | 1.089137  |
| H  | -1.862921 | 3.324318  | -1.843650 |
| C  | -0.352536 | 3.962845  | -0.436978 |
| C  | -0.383480 | 5.399551  | -0.861636 |

|   |           |           |           |
|---|-----------|-----------|-----------|
| H | -1.180143 | -1.242780 | 1.665024  |
| H | -0.467389 | 0.163050  | 2.506920  |
| N | -2.368934 | 0.465389  | 1.770394  |
| C | -2.447359 | 1.745703  | 2.432782  |
| H | -3.335183 | 1.795078  | 3.084734  |
| H | -1.561818 | 1.884736  | 3.066971  |
| H | -2.495017 | 2.595242  | 1.723219  |
| C | -3.452735 | 0.049351  | 1.003891  |
| C | -4.612263 | 0.842144  | 0.889309  |
| C | -3.439171 | -1.174457 | 0.306286  |
| C | -5.698620 | 0.415402  | 0.129515  |
| H | -4.674742 | 1.812798  | 1.385092  |
| C | -4.532050 | -1.576013 | -0.451562 |
| H | -2.557369 | -1.818562 | 0.322294  |
| C | -5.693170 | -0.800888 | -0.557948 |
| H | -6.580221 | 1.063856  | 0.062992  |
| H | -4.471413 | -2.530927 | -0.988307 |
| C | -6.873823 | -1.263508 | -1.356172 |
| H | -6.563098 | -1.815157 | -2.257927 |
| H | -7.519728 | -1.945550 | -0.775104 |
| H | -7.504375 | -0.418669 | -1.674502 |
| H | 0.324136  | 5.592192  | -1.687386 |
| H | -1.381145 | 5.695251  | -1.222148 |
| H | -0.103255 | 6.073326  | -0.037066 |
| H | 5.360719  | -0.825666 | 3.115243  |
| H | 4.798812  | 0.696312  | -3.501320 |
| H | 1.080658  | -1.377193 | 3.084246  |
| H | 0.561392  | -0.027658 | -3.017244 |
| C | 5.491131  | -0.145637 | 0.456685  |
| C | 5.382336  | 0.159575  | -0.865910 |
| H | 6.465031  | -0.137271 | 0.954395  |
| H | 6.266695  | 0.420065  | -1.454600 |

TS5f,1f'

Geometry with 64 atoms:

Thermal correction to Gibbs Free Energy: 0.445774

Total energy: -5331.825064170

|   |           |           |           |
|---|-----------|-----------|-----------|
| C | 1.151854  | -0.740124 | -1.471204 |
| C | -3.053131 | -0.678611 | -0.411296 |
| C | -4.279278 | -0.996672 | -0.993769 |
| C | -4.332847 | -1.848001 | -2.099017 |
| C | -3.118444 | -2.353788 | -2.575376 |
| C | -1.936645 | -1.989295 | -1.947900 |
| C | -2.929791 | 0.186425  | 0.783803  |
| C | -4.008597 | 0.843015  | 1.378054  |
| C | -3.805324 | 1.625946  | 2.516376  |
| C | -2.499899 | 1.711475  | 3.016200  |
| C | -1.479167 | 1.031331  | 2.368714  |
| H | -5.207461 | -0.589787 | -0.584165 |

|    |           |           |           |
|----|-----------|-----------|-----------|
| H  | -3.094211 | -3.030324 | -3.434424 |
| H  | -0.976244 | -2.377508 | -2.306174 |
| H  | -5.014537 | 0.757816  | 0.957901  |
| H  | -2.282993 | 2.310285  | 3.905622  |
| H  | -0.445171 | 1.074989  | 2.733821  |
| N  | -1.896097 | -1.164724 | -0.899467 |
| N  | -1.689714 | 0.293621  | 1.281334  |
| Br | 0.401043  | -2.299548 | 1.779756  |
| Ni | -0.200137 | -0.576857 | 0.132224  |
| C  | 0.322160  | 1.027355  | -0.742372 |
| C  | -0.459843 | 1.692341  | -1.695097 |
| C  | 1.206844  | 1.795005  | 0.032449  |
| C  | -0.390291 | 3.077488  | -1.837334 |
| H  | -1.138383 | 1.120759  | -2.342071 |
| C  | 1.264112  | 3.181331  | -0.106811 |
| H  | 1.863298  | 1.301763  | 0.762612  |
| H  | -1.016812 | 3.574158  | -2.588495 |
| H  | 1.951631  | 3.759154  | 0.522965  |
| C  | 0.464028  | 3.852212  | -1.041247 |
| C  | -5.628147 | -2.227238 | -2.730405 |
| H  | -5.554569 | -2.213835 | -3.829023 |
| H  | -5.906840 | -3.256066 | -2.444516 |
| H  | -6.445500 | -1.560847 | -2.419138 |
| C  | -4.933054 | 2.331498  | 3.189398  |
| H  | -5.832174 | 2.362191  | 2.557121  |
| H  | -5.200425 | 1.819477  | 4.129678  |
| H  | -4.652858 | 3.361659  | 3.460016  |
| C  | 0.507809  | 5.343322  | -1.173532 |
| H  | 1.235502  | -1.768064 | -1.068689 |
| H  | 0.531639  | -0.776558 | -2.377456 |
| N  | 2.434743  | -0.230801 | -1.803521 |
| C  | 2.531194  | 0.686940  | -2.913093 |
| H  | 3.380196  | 0.427916  | -3.569000 |
| H  | 1.617276  | 0.628897  | -3.519084 |
| H  | 2.663619  | 1.739480  | -2.592994 |
| C  | 3.525954  | -0.360060 | -0.955983 |
| C  | 4.724260  | 0.343933  | -1.196239 |
| C  | 3.486017  | -1.190291 | 0.183480  |
| C  | 5.821211  | 0.201556  | -0.348924 |
| H  | 4.811337  | 1.021238  | -2.048421 |
| C  | 4.591159  | -1.310830 | 1.016321  |
| H  | 2.573419  | -1.726873 | 0.457501  |
| C  | 5.790715  | -0.628696 | 0.774434  |
| H  | 6.733575  | 0.768094  | -0.571335 |
| H  | 4.510372  | -1.959083 | 1.898217  |
| C  | 6.978950  | -0.795415 | 1.670396  |
| H  | 6.685884  | -0.839165 | 2.732461  |
| H  | 7.526053  | -1.731607 | 1.457282  |
| H  | 7.697430  | 0.030930  | 1.550564  |

|   |           |          |           |
|---|-----------|----------|-----------|
| H | -0.243932 | 5.830038 | -0.526097 |
| H | 1.489399  | 5.749725 | -0.882130 |
| H | 0.295454  | 5.667742 | -2.204874 |

TS5f',1f'

Geometry with 64 atoms:

Thermal correction to Gibbs Free Energy: 0.451531

Total energy: -5331.809786700

|    |           |           |           |
|----|-----------|-----------|-----------|
| Ni | -0.815872 | -0.067576 | -0.275171 |
| C  | -2.563895 | -0.158348 | 0.622767  |
| C  | -5.370318 | -0.336973 | 0.104071  |
| C  | -3.322634 | -1.269579 | 1.026726  |
| C  | -3.256268 | 0.869415  | -0.038045 |
| C  | -4.623835 | 0.767421  | -0.306817 |
| C  | -4.684280 | -1.357368 | 0.778724  |
| H  | -2.833497 | -2.113723 | 1.528453  |
| H  | -2.741413 | 1.753496  | -0.418026 |
| H  | -5.118434 | 1.578576  | -0.853963 |
| H  | -5.232796 | -2.249338 | 1.103488  |
| N  | -0.196483 | 2.047182  | -0.129738 |
| C  | 0.915109  | 4.635921  | -0.082319 |
| C  | -0.858533 | 3.084877  | 0.387902  |
| C  | 1.049665  | 2.268517  | -0.586763 |
| C  | 1.618601  | 3.543311  | -0.590323 |
| C  | -0.355062 | 4.376600  | 0.438711  |
| N  | 1.091247  | -0.058146 | -1.137769 |
| C  | 3.851579  | -0.060157 | -1.636420 |
| C  | 1.722231  | -1.172203 | -1.517195 |
| C  | 1.802308  | 1.075293  | -1.033254 |
| C  | 3.176029  | 1.107604  | -1.278353 |
| C  | 3.083928  | -1.219068 | -1.775379 |
| H  | -1.848142 | 2.880582  | 0.810111  |
| H  | 2.622917  | 3.696868  | -0.992045 |
| H  | -0.953284 | 5.175536  | 0.884634  |
| H  | 1.089493  | -2.060812 | -1.614911 |
| H  | 3.741498  | 2.035030  | -1.160438 |
| H  | 3.548869  | -2.165840 | -2.066419 |
| Br | -1.520763 | -2.048472 | -1.749676 |
| C  | 5.331905  | -0.089687 | -1.816256 |
| H  | 5.757875  | 0.919361  | -1.908716 |
| H  | 5.804474  | -0.576040 | -0.944836 |
| H  | 5.617181  | -0.679206 | -2.700949 |
| C  | 1.488211  | 6.012311  | -0.102690 |
| H  | 1.153320  | 6.599511  | 0.764952  |
| H  | 2.587342  | 5.995095  | -0.121131 |
| H  | 1.153030  | 6.550853  | -1.005215 |
| C  | -1.134508 | -0.085084 | 1.913353  |
| N  | 0.262375  | 0.167193  | 2.110642  |
| H  | -1.687675 | 0.676745  | 2.478875  |

|   |           |           |           |
|---|-----------|-----------|-----------|
| H | -1.385035 | -1.069991 | 2.331873  |
| C | 1.203751  | -0.838394 | 1.902917  |
| C | 0.690097  | 1.404113  | 2.720229  |
| C | 2.575418  | -0.602187 | 2.118590  |
| C | 0.831054  | -2.120520 | 1.457754  |
| H | -0.181947 | 2.042763  | 2.909954  |
| H | 1.189306  | 1.221089  | 3.689137  |
| H | 1.394469  | 1.975245  | 2.086746  |
| C | 3.517004  | -1.596310 | 1.876457  |
| H | 2.923620  | 0.375140  | 2.459420  |
| C | 1.789129  | -3.103551 | 1.231743  |
| H | -0.212809 | -2.349559 | 1.229637  |
| C | 3.153352  | -2.868201 | 1.422121  |
| H | 4.577405  | -1.369013 | 2.040332  |
| H | 1.458553  | -4.084140 | 0.869274  |
| C | 4.189750  | -3.902000 | 1.104906  |
| H | 4.706593  | -3.673759 | 0.154919  |
| H | 4.969422  | -3.952656 | 1.882301  |
| H | 3.746871  | -4.904357 | 1.001027  |
| C | -6.844011 | -0.427907 | -0.142207 |
| H | -7.420756 | -0.172625 | 0.763961  |
| H | -7.166026 | 0.261649  | -0.937300 |
| H | -7.143911 | -1.448489 | -0.429346 |

TS5g,1g'

Geometry with 56 atoms:

Thermal correction to Gibbs Free Energy: 0.385091

Total energy: -5251.275130000

|    |           |           |           |
|----|-----------|-----------|-----------|
| Ni | 0.556098  | -0.523555 | -0.025905 |
| N  | 2.196655  | 0.061529  | -1.339436 |
| C  | 3.309163  | -0.044662 | -0.724897 |
| C  | 2.456996  | 0.880173  | -2.516813 |
| C  | 3.985306  | 1.047762  | -2.519491 |
| H  | 2.076016  | 0.390564  | -3.425721 |
| H  | 4.485751  | 0.477351  | -3.316316 |
| N  | 2.218383  | -0.927484 | 1.173712  |
| C  | 2.531518  | -1.677486 | 2.384047  |
| C  | 3.329739  | -0.706410 | 0.583126  |
| C  | 4.068259  | -1.681396 | 2.422890  |
| H  | 2.081721  | -1.198980 | 3.268050  |
| H  | 4.515232  | -2.682294 | 2.486290  |
| O  | 4.401648  | 0.488345  | -1.247715 |
| O  | 4.454318  | -1.097771 | 1.151490  |
| H  | 1.912750  | 1.836108  | -2.409969 |
| H  | 4.326387  | 2.090842  | -2.559996 |
| H  | 2.093739  | -2.687630 | 2.300796  |
| H  | 4.488200  | -1.050937 | 3.220468  |
| C  | 0.056051  | 1.272614  | 0.329459  |
| C  | -0.841807 | 1.763396  | -0.630471 |

|    |           |           |           |
|----|-----------|-----------|-----------|
| C  | -0.883010 | 3.123325  | -0.936607 |
| H  | -1.519485 | 1.074276  | -1.151838 |
| C  | 0.823349  | 3.545459  | 0.694417  |
| C  | -0.055370 | 4.041420  | -0.278284 |
| H  | -1.577268 | 3.482987  | -1.705269 |
| H  | 1.482511  | 4.243438  | 1.224335  |
| C  | -0.131174 | 5.507719  | -0.576887 |
| H  | -0.456807 | 5.694457  | -1.612055 |
| H  | -0.853941 | 6.018884  | 0.083169  |
| H  | 0.841245  | 6.002721  | -0.427752 |
| C  | 0.877324  | 2.186546  | 0.997851  |
| Br | 0.190034  | -2.819894 | -0.895184 |
| H  | 1.578242  | 1.832074  | 1.764764  |
| C  | -0.738371 | -0.188089 | 1.584927  |
| H  | -0.781452 | -1.293195 | 1.533904  |
| H  | -0.107032 | 0.086205  | 2.440837  |
| N  | -2.033661 | 0.357582  | 1.741894  |
| C  | -2.158446 | 1.595756  | 2.474036  |
| H  | -2.285211 | 2.473277  | 1.809450  |
| H  | -3.017887 | 1.562460  | 3.164047  |
| H  | -1.254861 | 1.756194  | 3.076566  |
| C  | -3.102007 | -0.060631 | 0.955616  |
| C  | -4.321169 | 0.646249  | 0.949147  |
| C  | -3.012132 | -1.197673 | 0.127762  |
| C  | -5.393478 | 0.215981  | 0.172372  |
| H  | -4.444160 | 1.549772  | 1.549399  |
| C  | -4.094499 | -1.603729 | -0.643655 |
| H  | -2.081289 | -1.765282 | 0.051765  |
| C  | -5.315096 | -0.918519 | -0.639675 |
| H  | -6.324233 | 0.795012  | 0.194747  |
| H  | -3.976780 | -2.488271 | -1.281643 |
| C  | -6.481558 | -1.389011 | -1.453947 |
| H  | -7.172582 | -0.563845 | -1.687142 |
| H  | -6.156825 | -1.840519 | -2.404986 |
| H  | -7.068821 | -2.158590 | -0.922058 |

TS5h,1h'

Geometry with 67 atoms:

Thermal correction to Gibbs Free Energy: 0.465839

Total energy: -5500.235306260

|   |           |           |          |
|---|-----------|-----------|----------|
| C | -2.458199 | 1.179348  | 3.173254 |
| C | -2.054410 | 1.239848  | 1.837626 |
| N | -2.198440 | 0.186642  | 1.029972 |
| C | -2.733002 | -0.956090 | 1.465682 |
| C | -3.175173 | -1.087696 | 2.783500 |
| C | -3.025501 | -0.002162 | 3.641481 |
| C | -1.441391 | 2.424615  | 1.196335 |
| C | -2.763036 | -2.041912 | 0.461298 |
| C | -3.536752 | -3.193255 | 0.612470 |

C -3.502319 -4.161640 -0.384915  
C -2.701477 -3.951618 -1.503012  
C -1.963761 -2.773348 -1.575939  
N -0.956315 2.224498 -0.040284  
N -1.986227 -1.847604 -0.620164  
C -0.459175 3.255926 -0.715805  
C -0.370649 4.537978 -0.179759  
C -0.836101 4.745084 1.115027  
C -1.391203 3.677152 1.811201  
Ni -0.954644 0.075991 -0.618553  
H -2.324098 2.031107 3.842795  
H -3.602912 -2.025247 3.144134  
H -3.342985 -0.080646 4.683751  
H -4.171644 -3.324232 1.491380  
H -4.102675 -5.069858 -0.291157  
H -2.646692 -4.683462 -2.311312  
H -1.328203 -2.564836 -2.444566  
H -0.116893 3.046405 -1.735561  
H 0.054906 5.352007 -0.770046  
H -0.782589 5.734190 1.576516  
H -1.794338 3.821771 2.815699  
C 0.590489 -0.353764 0.494014  
C 1.459727 0.672262 0.890516  
C 0.567995 -1.505132 1.294773  
C 2.211614 0.583483 2.059814  
H 1.566112 1.569455 0.269712  
C 1.319141 -1.595903 2.465362  
H -0.049572 -2.364147 1.002534  
C 2.155855 -0.551558 2.876409  
H 2.869610 1.415203 2.340857  
H 1.261896 -2.508091 3.071877  
C 3.006618 -0.666966 4.104137  
H 4.021324 -1.028285 3.857530  
H 3.130682 0.305458 4.606840  
H 2.580977 -1.376981 4.830349  
C 0.732659 -0.711217 -1.585714  
H 0.009439 -0.685215 -2.420142  
H 0.932469 -1.762607 -1.349256  
N 1.895989 -0.006459 -1.966287  
C 3.152362 -0.295099 -1.442157  
C 3.425211 -1.511292 -0.781879  
C 4.215457 0.620222 -1.557984  
C 4.677144 -1.769356 -0.243647  
H 2.643267 -2.264019 -0.663208  
C 5.466317 0.342036 -1.009826  
H 4.069966 1.577539 -2.062725  
C 5.730064 -0.848257 -0.330062  
H 4.842787 -2.724349 0.269633  
H 6.263126 1.087989 -1.112836

C 7.063122 -1.132895 0.291867  
H 7.019557 -1.076527 1.393831  
H 7.420864 -2.146053 0.044211  
H 7.827514 -0.414277 -0.041336  
C 1.721500 1.199897 -2.738214  
H 0.694856 1.230796 -3.133085  
H 1.886044 2.118191 -2.139891  
H 2.421526 1.234595 -3.590640  
Br -2.237375 0.780991 -2.795262

CP-2f-s

Geometry with 64 atoms:

Thermal correction to Gibbs Free Energy: 0.449418

Total energy: -5331.889379320

C 1.354284 -0.951963 -1.044008  
C -2.935761 -1.143867 -0.219223  
C -3.826289 -1.955665 -0.920941  
C -3.501055 -3.289321 -1.179429  
C -2.270390 -3.754065 -0.700266  
C -1.434625 -2.886376 -0.012122  
C -3.214624 0.265399 0.134012  
C -4.390121 0.926249 -0.215494  
C -4.601124 2.246950 0.191075  
C -3.604545 2.841999 0.970696  
C -2.451126 2.127437 1.264170  
H -4.783697 -1.558804 -1.269766  
H -1.965694 -4.791848 -0.864719  
H -0.469540 -3.221593 0.387117  
H -5.156567 0.416750 -0.805870  
H -3.722208 3.864175 1.342560  
H -1.653008 2.578281 1.863791  
N -1.749332 -1.609769 0.212666  
N -2.246494 0.877056 0.846274  
Br 0.809725 -1.285181 2.672888  
Ni -0.516919 -0.171380 0.978696  
C 0.629035 0.351016 -0.777137  
C -0.262812 0.856796 -1.758077  
C 1.047775 1.244121 0.244690  
C -0.699745 2.166873 -1.733142  
H -0.610346 0.180744 -2.549675  
C 0.613832 2.585058 0.233234  
H 1.840013 0.950551 0.940188  
H -1.403694 2.521750 -2.495716  
H 0.973530 3.266672 1.013504  
C -0.258231 3.064777 -0.736187  
C -4.437739 -4.192327 -1.907588  
H -3.895851 -4.865126 -2.590212  
H -4.984033 -4.834672 -1.195272  
H -5.185312 -3.627039 -2.483280

|   |           |           |           |
|---|-----------|-----------|-----------|
| C | -5.830441 | 2.992251  | -0.202292 |
| H | -6.668717 | 2.312023  | -0.414006 |
| H | -6.135853 | 3.706323  | 0.577456  |
| H | -5.644386 | 3.577823  | -1.119526 |
| C | -0.710155 | 4.491850  | -0.744932 |
| H | 1.587219  | -1.465288 | -0.099786 |
| H | 0.685102  | -1.626604 | -1.606525 |
| N | 2.571561  | -0.783119 | -1.824202 |
| C | 2.392256  | -0.507606 | -3.226731 |
| H | 3.223340  | -0.920719 | -3.822383 |
| H | 1.469352  | -0.993276 | -3.576589 |
| H | 2.317230  | 0.574723  | -3.463321 |
| C | 3.757156  | -0.402649 | -1.210216 |
| C | 4.801159  | 0.197199  | -1.943901 |
| C | 3.992435  | -0.614056 | 0.168943  |
| C | 6.010461  | 0.536257  | -1.338034 |
| H | 4.676490  | 0.412472  | -3.007375 |
| C | 5.203239  | -0.264581 | 0.751137  |
| H | 3.223023  | -1.055002 | 0.810348  |
| C | 6.248550  | 0.315973  | 0.019259  |
| H | 6.792627  | 1.000287  | -1.950991 |
| H | 5.339680  | -0.447808 | 1.824159  |
| C | 7.549747  | 0.670179  | 0.670464  |
| H | 7.398015  | 1.232782  | 1.607196  |
| H | 8.133240  | -0.228924 | 0.937821  |
| H | 8.181034  | 1.283278  | 0.008285  |
| H | -1.740268 | 4.588692  | -1.125966 |
| H | -0.671192 | 4.938318  | 0.261926  |
| H | -0.073206 | 5.114388  | -1.398881 |

6

Geometry with 36 atoms:

Thermal correction to Gibbs Free Energy: 0.25945

Total energy: -675.616390420

|   |           |           |           |
|---|-----------|-----------|-----------|
| N | -0.611001 | 1.808173  | 0.150135  |
| C | -1.563140 | 0.807142  | 0.117843  |
| C | -1.489203 | -0.321176 | 0.966241  |
| C | -2.657692 | 0.867431  | -0.770006 |
| C | -2.463038 | -1.311014 | 0.926827  |
| H | -0.656516 | -0.435219 | 1.665046  |
| C | -3.620272 | -0.139309 | -0.792725 |
| H | -2.769495 | 1.713940  | -1.451421 |
| C | -3.553336 | -1.252481 | 0.049044  |
| H | -2.368466 | -2.168619 | 1.604115  |
| H | -4.456922 | -0.050238 | -1.496153 |
| C | -4.576139 | -2.345915 | 0.004945  |
| H | -4.182516 | -3.257887 | -0.478735 |
| H | -4.899981 | -2.643977 | 1.016309  |
| H | -5.471426 | -2.040625 | -0.559196 |

|   |           |           |           |
|---|-----------|-----------|-----------|
| C | 0.549236  | 1.688712  | 0.997859  |
| H | 0.985791  | 2.696061  | 1.115324  |
| H | 0.250538  | 1.396708  | 2.021937  |
| C | -0.661583 | 2.870391  | -0.823410 |
| H | -1.571572 | 3.490247  | -0.718689 |
| H | 0.205425  | 3.531867  | -0.689805 |
| C | 1.621267  | 0.744260  | 0.504205  |
| C | 2.651487  | 0.352294  | 1.368381  |
| C | 1.636295  | 0.257649  | -0.803348 |
| C | 3.666658  | -0.491262 | 0.933065  |
| H | 2.651491  | 0.718443  | 2.402191  |
| C | 2.655462  | -0.591388 | -1.237188 |
| H | 0.835466  | 0.538535  | -1.496410 |
| C | 3.688829  | -0.981130 | -0.381172 |
| H | 4.463722  | -0.785951 | 1.625977  |
| H | 2.645739  | -0.962805 | -2.268293 |
| C | 4.783193  | -1.897075 | -0.833142 |
| H | -0.637332 | 2.495825  | -1.865813 |
| H | 4.687085  | -2.152496 | -1.899431 |
| H | 5.777232  | -1.443228 | -0.681749 |
| H | 4.780592  | -2.840565 | -0.260667 |

Br-

Geometry with 1 atoms:

Thermal correction to Gibbs Free Energy: -0.016176

Total energy: -2574.136168480

|    |          |          |          |
|----|----------|----------|----------|
| Br | 0.000000 | 0.000000 | 0.000000 |
|----|----------|----------|----------|

MECP at 3

Geometry with 42 atoms:

Thermal correction to Gibbs Free Energy: 0.271261

Total energy: -4927.061797870

|    |           |           |           |
|----|-----------|-----------|-----------|
| Ni | 0.333156  | -0.684167 | -0.450258 |
| N  | -0.387822 | 1.183376  | -0.664841 |
| C  | 2.080982  | -0.125270 | 0.202752  |
| N  | -1.612827 | -0.921982 | 0.247196  |
| Br | 0.718606  | -2.900737 | -1.160112 |
| C  | 0.328934  | 2.201680  | -1.158394 |
| C  | -0.184109 | 3.490586  | -1.266522 |
| C  | -1.491079 | 3.757350  | -0.829169 |
| C  | -2.222346 | 2.683097  | -0.307462 |
| C  | -1.653562 | 1.406409  | -0.244201 |
| C  | -2.351544 | 0.205749  | 0.275601  |
| C  | -3.664900 | 0.202656  | 0.761346  |
| C  | -4.231295 | -0.985038 | 1.239454  |
| C  | -3.435474 | -2.141965 | 1.194202  |
| C  | -2.140424 | -2.069827 | 0.689384  |
| C  | 3.302853  | -0.641516 | -0.268161 |
| C  | 4.526459  | -0.198501 | 0.242938  |

|   |           |           |           |
|---|-----------|-----------|-----------|
| C | 4.587147  | 0.765975  | 1.263151  |
| C | 3.375001  | 1.275565  | 1.747636  |
| C | 2.150960  | 0.842647  | 1.219976  |
| C | -5.630768 | -1.027885 | 1.791315  |
| C | -2.087390 | 5.134847  | -0.936512 |
| C | 5.917703  | 1.227868  | 1.808739  |
| H | 1.352464  | 1.958706  | -1.450304 |
| H | 0.440976  | 4.285675  | -1.678366 |
| H | -3.238896 | 2.847820  | 0.052223  |
| H | -4.252890 | 1.121371  | 0.769965  |
| H | -3.824623 | -3.100408 | 1.545370  |
| H | -1.487770 | -2.943623 | 0.605539  |
| H | 3.292402  | -1.413245 | -1.041864 |
| H | 5.458556  | -0.619164 | -0.150681 |
| H | 3.386935  | 2.022088  | 2.549395  |
| H | 1.229117  | 1.277494  | 1.623317  |
| H | -6.207691 | -1.850562 | 1.340073  |
| H | -5.610692 | -1.208044 | 2.879346  |
| H | -6.172123 | -0.087502 | 1.613524  |
| H | -2.489769 | 5.300443  | -1.950915 |
| H | -2.913763 | 5.277942  | -0.224663 |
| H | -1.331291 | 5.913488  | -0.755022 |
| H | 5.793578  | 1.953323  | 2.627622  |
| H | 6.508332  | 0.381039  | 2.197971  |
| H | 6.529228  | 1.709278  | 1.025684  |

[anethole]'+

Geometry with 23 atoms:

Thermal correction to Gibbs Free Energy: 0.155404

Total energy: -463.135857675

|   |           |           |           |
|---|-----------|-----------|-----------|
| H | -0.321412 | -2.325759 | 0.000224  |
| C | 0.049825  | -1.296536 | 0.000183  |
| C | 0.939968  | 1.358211  | 0.000192  |
| C | -0.900478 | -0.229854 | 0.000217  |
| C | 1.400602  | -1.063990 | 0.000066  |
| C | 1.869865  | 0.276519  | 0.000056  |
| C | -0.401176 | 1.111081  | 0.000260  |
| H | 2.101065  | -1.901315 | 0.000005  |
| H | -1.095897 | 1.954282  | 0.000414  |
| H | 1.345263  | 2.372899  | 0.000254  |
| O | 3.130127  | 0.614868  | -0.000057 |
| C | 4.170179  | -0.358712 | -0.000342 |
| H | 4.112903  | -0.984929 | 0.903596  |
| H | 5.112131  | 0.199636  | -0.000580 |
| H | 4.112433  | -0.984917 | -0.904257 |
| H | -2.533604 | -1.622833 | 0.000525  |
| C | -2.283577 | -0.553865 | 0.000201  |
| C | -3.326212 | 0.341653  | -0.000298 |
| H | -3.103873 | 1.417415  | -0.000768 |

|   |           |           |           |
|---|-----------|-----------|-----------|
| C | -4.744739 | -0.037996 | -0.000260 |
| H | -5.258317 | 0.401659  | 0.874155  |
| H | -4.898801 | -1.125748 | -0.000153 |
| H | -5.258454 | 0.401593  | -0.874609 |

anethole

Geometry with 23 atoms:

Thermal correction to Gibbs Free Energy: 0.155642

Total energy: -463.329277376

|   |           |           |           |
|---|-----------|-----------|-----------|
| H | -0.327962 | -2.294881 | 0.000252  |
| C | 0.036128  | -1.261477 | 0.000220  |
| C | 0.971736  | 1.342815  | 0.000155  |
| C | -0.895071 | -0.218253 | 0.000225  |
| C | 1.411609  | -1.031176 | 0.000160  |
| C | 1.889051  | 0.281067  | 0.000121  |
| C | -0.388046 | 1.095128  | 0.000210  |
| H | 2.095920  | -1.882700 | 0.000164  |
| H | -1.078653 | 1.944189  | 0.000258  |
| H | 1.367533  | 2.362194  | 0.000144  |
| O | 3.195635  | 0.622151  | 0.000068  |
| C | 4.154582  | -0.393638 | -0.000502 |
| H | 4.077911  | -1.036390 | 0.896593  |
| H | 5.140647  | 0.089792  | -0.000890 |
| H | 4.077071  | -1.036156 | -0.897690 |
| H | -2.565302 | -1.600858 | 0.000537  |
| C | -2.325835 | -0.526990 | 0.000224  |
| C | -3.348437 | 0.339956  | -0.000128 |
| H | -3.134836 | 1.418157  | -0.000415 |
| C | -4.785213 | -0.046067 | -0.000355 |
| H | -5.315260 | 0.357394  | 0.880276  |
| H | -4.911143 | -1.140275 | 0.001491  |
| H | -5.314017 | 0.354149  | -0.883242 |

[N(2,4,6-tribromophenyl)]3'+

Geometry with 34 atoms:

Thermal correction to Gibbs Free Energy: 0.117401

Total energy: -23910.371532500

|   |           |           |           |
|---|-----------|-----------|-----------|
| N | 0.000070  | 0.000313  | 0.000628  |
| C | -0.339684 | 1.362586  | 0.000597  |
| C | -1.021171 | 4.094558  | 0.000179  |
| C | 0.294895  | 2.282132  | -0.881721 |
| C | -1.332035 | 1.876467  | 0.882510  |
| C | -1.669747 | 3.219660  | 0.874567  |
| C | -0.037765 | 3.626562  | -0.874260 |
| H | -2.421281 | 3.595749  | 1.572797  |
| H | 0.448914  | 4.311322  | -1.572873 |
| C | -1.009945 | -0.975052 | -0.000145 |
| C | -3.037063 | -2.930028 | 0.000345  |
| C | -2.124753 | -0.883957 | -0.881068 |



|    |           |           |           |
|----|-----------|-----------|-----------|
| C  | -0.958765 | -2.092755 | 0.880500  |
| C  | -1.954088 | -3.055836 | 0.873237  |
| C  | -3.123350 | -1.843707 | -0.873330 |
| H  | -3.960261 | -1.763430 | -1.571161 |
| C  | 1.349608  | -0.386337 | 0.000749  |
| C  | 4.057008  | -1.161463 | -0.000525 |
| C  | 2.291200  | 0.216227  | 0.882349  |
| C  | 1.828843  | -1.395789 | -0.881396 |
| C  | 3.159679  | -1.779374 | -0.874466 |
| C  | 3.623479  | -0.162398 | 0.874071  |
| H  | 3.509200  | -2.543273 | -1.573088 |
| H  | 4.324869  | 0.300602  | 1.572337  |
| Br | 5.849946  | -1.675232 | -0.001652 |
| Br | -1.471971 | 5.904507  | 0.000549  |
| Br | 0.356599  | -2.290307 | 2.215852  |
| Br | -2.271536 | 0.434470  | -2.219736 |
| Br | -2.154347 | 0.835671  | 2.221087  |
| Br | 1.509627  | 1.748907  | -2.220312 |
| Br | 1.801794  | 1.447917  | 2.222263  |
| Br | 0.759975  | -2.183129 | -2.219034 |
| H  | -1.903536 | -3.895561 | 1.570455  |
| Br | -4.379416 | -4.224992 | 0.000524  |

N(2,4,6-tribromophenyl)3

Geometry with 34 atoms:

Thermal correction to Gibbs Free Energy: 0.118178

Total energy: -23910.597624800

|   |           |           |           |
|---|-----------|-----------|-----------|
| N | -0.002105 | 0.004064  | -0.001024 |
| C | -1.322519 | 0.518796  | 0.001310  |
| C | -3.958244 | 1.542976  | 0.003480  |
| C | -1.734006 | 1.521601  | -0.903479 |
| C | -2.301638 | 0.057017  | 0.907945  |
| C | -3.606268 | 0.540026  | 0.897642  |
| C | -3.022459 | 2.046273  | -0.891356 |
| H | -4.334094 | 0.151319  | 1.613471  |
| H | -3.297739 | 2.824743  | -1.606574 |
| C | 0.210739  | -1.397656 | 0.001620  |
| C | 0.638005  | -4.194535 | 0.004430  |
| C | -0.465318 | -2.257793 | -0.891917 |
| C | 1.111280  | -2.014861 | 0.897518  |
| C | 1.342641  | -3.386796 | 0.887776  |
| C | -0.275927 | -3.636058 | -0.879680 |
| H | -0.822220 | -4.264243 | -1.586945 |
| C | 1.105329  | 0.889089  | -0.005704 |
| C | 3.320738  | 2.648327  | -0.007694 |
| C | 1.197290  | 1.975590  | 0.891978  |
| C | 2.182435  | 0.732618  | -0.905607 |
| C | 3.285282  | 1.580751  | -0.895335 |
| C | 2.273302  | 2.857428  | 0.880021  |

|    |           |           |           |
|----|-----------|-----------|-----------|
| H  | 4.099183  | 1.420163  | -1.605914 |
| H  | 2.302354  | 3.686467  | 1.590766  |
| Br | 4.799332  | 3.819456  | -0.007691 |
| Br | -5.716871 | 2.224826  | 0.004066  |
| Br | 2.023263  | -1.050767 | 2.245320  |
| Br | -1.623083 | -1.614603 | -2.242217 |
| Br | -1.908968 | -1.192659 | 2.271632  |
| Br | -0.600863 | 2.177835  | -2.267484 |
| Br | -0.083613 | 2.280206  | 2.249182  |
| Br | 2.190836  | -0.590085 | -2.257028 |
| H  | 2.051751  | -3.821805 | 1.595757  |
| Br | 0.923725  | -6.058833 | 0.005618  |

[N(4-bromophenyl)3]<sup>+</sup>

Geometry with 34 atoms:

Thermal correction to Gibbs Free Energy: 0.193925

Total energy: -8469.621496220

|    |           |           |           |
|----|-----------|-----------|-----------|
| N  | -0.002079 | -0.000440 | -0.001820 |
| C  | 0.747833  | -1.186413 | -0.001632 |
| C  | 2.235802  | -3.538642 | 0.000888  |
| C  | 0.325265  | -2.289473 | -0.767923 |
| C  | 1.924794  | -1.275958 | 0.765799  |
| C  | 2.661891  | -2.446443 | 0.768918  |
| C  | 1.067135  | -3.456974 | -0.768319 |
| H  | 3.564747  | -2.528870 | 1.379174  |
| H  | 0.755625  | -4.308895 | -1.377833 |
| C  | 0.650689  | 1.241920  | -0.002834 |
| C  | 1.948372  | 3.704110  | -0.001246 |
| C  | 1.814696  | 1.426390  | -0.773107 |
| C  | 0.144101  | 2.305757  | 0.767672  |
| C  | 0.791571  | 3.528094  | 0.770289  |
| C  | 2.456949  | 2.651488  | -0.774377 |
| H  | 3.348790  | 2.806826  | -1.386630 |
| C  | -1.403839 | -0.055843 | -0.000961 |
| C  | -4.184903 | -0.165259 | 0.000173  |
| C  | -2.071222 | -1.031162 | 0.764505  |
| C  | -2.146501 | 0.863980  | -0.765919 |
| C  | -3.528413 | 0.806936  | -0.767085 |
| C  | -3.453348 | -1.082750 | 0.766750  |
| H  | -4.109417 | 1.504745  | -1.375304 |
| H  | -3.977199 | -1.824209 | 1.375182  |
| H  | 0.415346  | 4.350871  | 1.383229  |
| H  | -1.495128 | -1.725119 | 1.383270  |
| H  | -1.627156 | 1.601157  | -1.384947 |
| H  | -0.741755 | 2.153035  | 1.390713  |
| H  | 2.236391  | -0.430152 | 1.385176  |
| H  | 2.190839  | 0.609474  | -1.395463 |
| H  | -0.571010 | -2.209447 | -1.389500 |
| Br | 2.820283  | 5.356257  | 0.001803  |

Br -6.051215 -0.239131 0.000876  
Br 3.234910 -5.116979 0.001210

N(4-bromophenyl)3

Geometry with 34 atoms:

Thermal correction to Gibbs Free Energy: 0.193465

Total energy: -8469.813644740

N -0.000207 0.000892 0.003949  
C 1.159659 0.805220 0.002823  
C 3.456167 2.397271 -0.000122  
C 2.256158 0.471681 -0.803088  
C 1.233261 1.949984 0.807205  
C 2.370771 2.748688 0.800563  
C 3.403118 1.256656 -0.799330  
H 2.422039 3.640245 1.431301  
H 4.255009 0.991121 -1.431038  
C -1.276833 0.602827 0.002701  
C -3.805012 1.793283 0.000169  
C -1.537493 1.718495 -0.803644  
C -2.304369 0.093701 0.807729  
C -3.565318 0.678268 0.801295  
C -2.791418 2.318124 -0.799713  
H -2.988383 3.188045 -1.431965  
C 0.116647 -1.405694 0.003036  
C 0.348584 -4.190380 0.000171  
C 1.070070 -2.041381 0.809107  
C -0.718737 -2.188776 -0.804329  
C -0.611661 -3.574508 -0.800642  
C 1.193733 -3.425744 0.802518  
H -1.265975 -4.179647 -1.433848  
H 1.939447 -3.915557 1.434408  
H -4.362468 0.276380 1.432411  
H 1.721300 -1.438291 1.448923  
H -1.460641 -1.700507 -1.443346  
H -2.107846 -0.772443 1.446754  
H 0.385148 2.213863 1.446137  
H -0.743790 2.118173 -1.441954  
H 2.204702 -0.415856 -1.440879  
Br -5.516068 2.598906 -0.001839  
Br 0.505958 -6.075015 -0.002021  
Br 5.010652 3.474450 -0.001946

[NEt3]<sup>+</sup>

Geometry with 22 atoms:

Thermal correction to Gibbs Free Energy: 0.168117

Total energy: -292.114113088

N 0.150483 0.017366 0.112630  
C -0.495705 -1.019505 -0.657058  
H -1.113360 -0.550328 -1.438964

H 0.293355 -1.611147 -1.148841  
C -1.351376 -1.907912 0.247886  
H -2.157268 -1.336942 0.732806  
H -0.741672 -2.392363 1.025262  
H -1.811085 -2.694913 -0.366345  
C -0.528022 1.231069 0.508871  
H 0.243137 2.024871 0.538724  
H -0.804011 1.083527 1.578834  
C -1.723607 1.630344 -0.316592  
H -1.455343 1.797122 -1.371156  
H -2.118836 2.578436 0.073487  
H -2.541159 0.896046 -0.266220  
C 1.498292 -0.203663 0.592136  
H 1.610606 -1.281589 0.800521  
H 1.620861 0.349211 1.538030  
C 2.523410 0.255270 -0.442302  
H 3.531519 0.070467 -0.045443  
H 2.429718 1.331811 -0.649685  
H 2.422212 -0.299386 -1.387066

NEt3

Geometry with 22 atoms:

Thermal correction to Gibbs Free Energy: 0.169802

Total energy: -292.298458075

N 0.000119 -0.306548 -0.004702  
C -1.209861 -1.079659 0.184214  
H -1.061969 -2.058030 -0.307393  
H -1.387816 -1.310558 1.264724  
C -2.438429 -0.418292 -0.403114  
H -2.289125 -0.212586 -1.475663  
H -2.672491 0.538845 0.091845  
H -3.323588 -1.063949 -0.292417  
C -0.000136 0.971489 0.698102  
H 0.875239 1.026061 1.376306  
H -0.875267 1.025535 1.376681  
C -0.000652 2.168566 -0.232557  
H 0.885151 2.156814 -0.887812  
H -0.000764 3.118787 0.326425  
H -0.886733 2.156393 -0.887424  
C 1.210344 -1.079261 0.184300  
H 1.062738 -2.057744 -0.307168  
H 1.388402 -1.309963 1.264833  
C 2.438675 -0.417587 -0.403184  
H 3.324042 -1.062965 -0.292514  
H 2.672494 0.539670 0.091659  
H 2.289197 -0.212014 -1.475733

thianthrene

Geometry with 22 atoms:

Thermal correction to Gibbs Free Energy: 0.124914

Total energy: -1258.288342080

|   |           |           |           |
|---|-----------|-----------|-----------|
| H | 2.467451  | 2.486963  | -0.318274 |
| C | 2.487669  | 1.392804  | -0.300866 |
| C | 2.487666  | -1.392805 | -0.300872 |
| C | 1.369458  | 0.700739  | 0.171355  |
| C | 3.612729  | 0.696890  | -0.733574 |
| C | 3.612728  | -0.696892 | -0.733578 |
| C | 1.369457  | -0.700740 | 0.171353  |
| H | 4.489071  | 1.248263  | -1.085283 |
| H | 4.489068  | -1.248265 | -1.085291 |
| H | 2.467446  | -2.486964 | -0.318285 |
| S | 0.000000  | 1.626870  | 0.822763  |
| S | -0.000000 | -1.626870 | 0.822764  |
| C | -1.369457 | 0.700740  | 0.171353  |
| C | -1.369458 | -0.700740 | 0.171355  |
| C | -2.487666 | 1.392805  | -0.300871 |
| H | -2.467445 | 2.486964  | -0.318284 |
| C | -2.487669 | -1.392804 | -0.300866 |
| H | -2.467451 | -2.486963 | -0.318275 |
| C | -3.612729 | -0.696890 | -0.733575 |
| H | -4.489071 | -1.248262 | -1.085284 |
| C | -3.612728 | 0.696892  | -0.733577 |
| H | -4.489068 | 1.248265  | -1.085290 |

[thianthrenium]<sup>+</sup>

Geometry with 22 atoms:

Thermal correction to Gibbs Free Energy: 0.123799

Total energy: -1258.090914250

|   |           |           |           |
|---|-----------|-----------|-----------|
| H | 2.623911  | -2.492605 | -0.000008 |
| C | 2.627385  | -1.397930 | -0.000005 |
| C | 2.627382  | 1.397930  | 0.000037  |
| C | 1.400666  | -0.707535 | 0.000073  |
| C | 3.820190  | -0.702769 | -0.000046 |
| C | 3.820189  | 0.702774  | -0.000021 |
| C | 1.400664  | 0.707531  | 0.000089  |
| H | 4.765368  | -1.250623 | -0.000126 |
| H | 4.765367  | 1.250627  | -0.000078 |
| H | 2.623900  | 2.492605  | 0.000065  |
| S | -0.000001 | -1.734698 | -0.000036 |
| S | 0.000001  | 1.734696  | -0.000038 |
| C | -1.400664 | -0.707532 | 0.000082  |
| C | -1.400666 | 0.707535  | 0.000067  |
| C | -2.627382 | -1.397930 | 0.000034  |
| H | -2.623904 | -2.492605 | 0.000063  |
| C | -2.627384 | 1.397931  | -0.000004 |
| H | -2.623907 | 2.492606  | -0.000004 |
| C | -3.820190 | 0.702771  | -0.000043 |
| H | -4.765368 | 1.250625  | -0.000117 |

|   |           |           |           |
|---|-----------|-----------|-----------|
| C | -3.820189 | -0.702772 | -0.000021 |
| H | -4.765367 | -1.250626 | -0.000076 |

III-f-s

Geometry with 49 atoms:

Thermal correction to Gibbs Free Energy: 0.34196

Total energy: -2486.877238060

|    |           |           |           |
|----|-----------|-----------|-----------|
| Ni | 0.047998  | -1.846776 | -0.605517 |
| C  | 2.127976  | 0.040981  | -0.328454 |
| C  | 3.342364  | 0.605930  | 0.056616  |
| C  | 4.357256  | -0.196256 | 0.581456  |
| C  | 4.087684  | -1.565569 | 0.703089  |
| C  | 2.853590  | -2.058164 | 0.309500  |
| C  | 1.009162  | 0.812360  | -0.905112 |
| C  | 0.993008  | 2.202232  | -1.017244 |
| C  | -0.119903 | 2.842491  | -1.567582 |
| C  | -1.175364 | 2.033263  | -2.005918 |
| C  | -1.089299 | 0.657064  | -1.850581 |
| H  | 3.508534  | 1.680864  | -0.056162 |
| H  | 4.839615  | -2.246395 | 1.111752  |
| H  | 2.615752  | -3.122906 | 0.407209  |
| H  | 1.839878  | 2.798461  | -0.665832 |
| H  | -2.068884 | 2.478466  | -2.452906 |
| H  | -1.910790 | -0.000189 | -2.161340 |
| N  | 1.887266  | -1.282522 | -0.197767 |
| N  | -0.028486 | 0.057945  | -1.309795 |
| C  | 5.679804  | 0.371876  | 0.975351  |
| H  | 6.432097  | 0.177208  | 0.192265  |
| H  | 5.628982  | 1.460260  | 1.121722  |
| H  | 6.055648  | -0.092822 | 1.899490  |
| C  | -0.200134 | 4.330108  | -1.658671 |
| H  | -0.863344 | 4.725816  | -0.870597 |
| H  | 0.784597  | 4.802329  | -1.533103 |
| H  | -0.626595 | 4.650059  | -2.621633 |
| C  | -1.698124 | -2.766024 | -0.635496 |
| N  | -2.774055 | -2.052732 | 0.079235  |
| H  | -2.023158 | -2.838751 | -1.699665 |
| H  | -1.679078 | -3.824273 | -0.289277 |
| C  | -2.514088 | -0.878752 | 0.763562  |
| C  | -4.098654 | -2.259731 | -0.435663 |
| C  | -3.393143 | 0.221314  | 0.762780  |
| C  | -1.323690 | -0.733920 | 1.516816  |
| H  | -4.236710 | -3.329690 | -0.660954 |
| H  | -4.876247 | -1.970516 | 0.292184  |
| H  | -4.299458 | -1.700220 | -1.378742 |
| C  | -3.057764 | 1.416452  | 1.404815  |
| H  | -4.336145 | 0.171062  | 0.211312  |
| C  | -1.003535 | 0.460078  | 2.142478  |
| H  | -0.651496 | -1.593709 | 1.604103  |

|   |           |          |          |
|---|-----------|----------|----------|
| C | -1.852348 | 1.578479 | 2.088330 |
| H | -3.757790 | 2.259384 | 1.349393 |
| H | -0.060844 | 0.531340 | 2.701419 |
| C | -1.459958 | 2.876654 | 2.726101 |
| H | -0.583477 | 3.327637 | 2.226269 |
| H | -2.276948 | 3.613653 | 2.682861 |
| H | -1.180190 | 2.748642 | 3.785956 |

### III'-f-s

Geometry with 50 atoms:

Thermal correction to Gibbs Free Energy: 0.345767

Total energy: -5061.019636710

|    |           |           |           |
|----|-----------|-----------|-----------|
| Ni | 1.444367  | -0.703806 | 0.401225  |
| Br | 3.716186  | -0.177573 | 0.602288  |
| C  | -1.205172 | -0.447936 | 1.221705  |
| C  | -2.510652 | -0.780288 | 1.562112  |
| C  | -2.915548 | -2.117735 | 1.570601  |
| C  | -1.945952 | -3.076240 | 1.261420  |
| C  | -0.663551 | -2.671509 | 0.919046  |
| C  | -0.688576 | 0.929968  | 1.199636  |
| C  | -1.497386 | 2.059461  | 1.203319  |
| C  | -0.919102 | 3.329224  | 1.108012  |
| C  | 0.475571  | 3.392288  | 1.045667  |
| C  | 1.219575  | 2.217767  | 1.058188  |
| H  | -3.222766 | 0.005107  | 1.831120  |
| H  | -2.190538 | -4.141555 | 1.274926  |
| H  | 0.099031  | -3.407677 | 0.646702  |
| H  | -2.586816 | 1.960608  | 1.236193  |
| H  | 0.985139  | 4.357360  | 0.977239  |
| H  | 2.314765  | 2.229026  | 0.999334  |
| N  | -0.297588 | -1.387568 | 0.876371  |
| N  | 0.656564  | 1.010780  | 1.128177  |
| C  | -4.327976 | -2.490811 | 1.868559  |
| H  | -4.757878 | -1.849880 | 2.652598  |
| H  | -4.950195 | -2.355020 | 0.966847  |
| H  | -4.417389 | -3.542185 | 2.176149  |
| C  | -1.775426 | 4.548183  | 1.032958  |
| H  | -2.317563 | 4.571052  | 0.072027  |
| H  | -2.538945 | 4.548360  | 1.826287  |
| H  | -1.184436 | 5.471234  | 1.110740  |
| C  | 1.664120  | -1.831933 | -1.124644 |
| N  | 1.300094  | -0.878438 | -2.153926 |
| H  | 2.687479  | -2.190301 | -1.316985 |
| H  | 0.982768  | -2.700565 | -1.129354 |
| C  | -0.014863 | -0.400541 | -2.198972 |
| C  | 2.343422  | -0.019866 | -2.658903 |
| C  | -0.307826 | 0.966905  | -2.338855 |
| C  | -1.103172 | -1.285111 | -2.073193 |
| H  | 3.267366  | -0.604621 | -2.780694 |

|   |           |           |           |
|---|-----------|-----------|-----------|
| H | 2.059493  | 0.383417  | -3.644431 |
| H | 2.588288  | 0.830401  | -1.989095 |
| C | -1.622816 | 1.425295  | -2.271140 |
| H | 0.500391  | 1.695782  | -2.443683 |
| C | -2.405874 | -0.813317 | -2.007380 |
| H | -0.916088 | -2.360710 | -2.005669 |
| C | -2.698908 | 0.556403  | -2.078905 |
| H | -1.810430 | 2.504466  | -2.335112 |
| H | -3.226655 | -1.530349 | -1.879289 |
| C | -4.104357 | 1.055262  | -1.936783 |
| H | -4.629174 | 0.539807  | -1.114028 |
| H | -4.127983 | 2.136427  | -1.726574 |
| H | -4.703330 | 0.885227  | -2.848643 |

### III-f-TS

Geometry with 64 atoms:

Thermal correction to Gibbs Free Energy: 0.447315

Total energy: -5331.796353960

|    |           |           |           |
|----|-----------|-----------|-----------|
| Ni | -0.750465 | -0.560632 | -0.110381 |
| C  | -2.431531 | -1.540971 | -0.123475 |
| C  | -4.947208 | -0.251661 | -0.190472 |
| C  | -3.320407 | -1.660578 | 0.972548  |
| C  | -2.883838 | -0.915690 | -1.309808 |
| C  | -4.108836 | -0.237894 | -1.303561 |
| C  | -4.529349 | -0.995166 | 0.939367  |
| H  | -3.012504 | -2.218567 | 1.863748  |
| H  | -2.279676 | -0.959363 | -2.222708 |
| H  | -4.428798 | 0.290240  | -2.209725 |
| H  | -5.186408 | -1.039145 | 1.816651  |
| N  | -1.052179 | 1.473228  | -0.100261 |
| C  | -1.031307 | 4.258550  | 0.124095  |
| C  | -2.076248 | 2.116584  | 0.465997  |
| C  | -0.006537 | 2.179127  | -0.566369 |
| C  | 0.030015  | 3.572872  | -0.464726 |
| C  | -2.110473 | 3.495268  | 0.595602  |
| N  | 0.811478  | 0.055536  | -1.282119 |
| C  | 3.302999  | 1.073321  | -2.058309 |
| C  | 1.744171  | -0.741643 | -1.811152 |
| C  | 1.078754  | 1.372278  | -1.155218 |
| C  | 2.315148  | 1.902885  | -1.526879 |
| C  | 2.983604  | -0.280723 | -2.224316 |
| H  | -2.900685 | 1.490045  | 0.829697  |
| H  | 0.884733  | 4.134134  | -0.851558 |
| H  | -2.971066 | 3.979923  | 1.065208  |
| H  | 1.482576  | -1.803655 | -1.893036 |
| H  | 2.525518  | 2.966416  | -1.384702 |
| H  | 3.711324  | -0.977438 | -2.650502 |
| Br | -1.200406 | -3.224314 | -0.540261 |
| C  | 4.661529  | 1.592218  | -2.390332 |

|   |           |           |           |
|---|-----------|-----------|-----------|
| H | 4.653372  | 2.675638  | -2.578022 |
| H | 5.348748  | 1.408857  | -1.545503 |
| H | 5.087125  | 1.080365  | -3.266448 |
| C | -1.034151 | 5.745757  | 0.248837  |
| H | -1.143200 | 6.049998  | 1.302234  |
| H | -0.111363 | 6.192768  | -0.146546 |
| H | -1.888720 | 6.181582  | -0.293788 |
| C | -0.379547 | -0.724186 | 1.843015  |
| N | 0.799181  | 0.029787  | 2.221846  |
| H | -1.239384 | -0.313063 | 2.401394  |
| H | -0.275014 | -1.787958 | 2.138178  |
| C | 2.052905  | -0.377930 | 1.832189  |
| C | 0.635130  | 1.352652  | 2.765142  |
| C | 3.189036  | 0.452070  | 1.972276  |
| C | 2.263876  | -1.656170 | 1.257511  |
| H | -0.410475 | 1.494619  | 3.070416  |
| H | 1.266887  | 1.510607  | 3.658343  |
| H | 0.887045  | 2.157228  | 2.042615  |
| C | 4.443907  | 0.031208  | 1.540584  |
| H | 3.093987  | 1.450153  | 2.406352  |
| C | 3.527508  | -2.053374 | 0.843142  |
| H | 1.418372  | -2.331563 | 1.108449  |
| C | 4.650074  | -1.223144 | 0.958083  |
| H | 5.295715  | 0.713013  | 1.655865  |
| H | 3.644349  | -3.046912 | 0.391436  |
| C | 5.992842  | -1.654820 | 0.450287  |
| H | 6.015408  | -1.715446 | -0.653106 |
| H | 6.784908  | -0.951865 | 0.752567  |
| H | 6.272970  | -2.655129 | 0.821798  |
| C | -6.266909 | 0.455864  | -0.181787 |
| H | -7.106356 | -0.241215 | -0.014678 |
| H | -6.320352 | 1.205152  | 0.627320  |
| H | -6.452089 | 0.979187  | -1.132048 |

## Reference

- 1 J. Ho, M. Coote, C. Cramer and D. Truhlar, in *Organic Electrochemistry*, 2015, DOI: 10.1201/b19122-8, pp. 229-260.
- 2 D. Nicewicz, H. Roth and N. Romero, *Synlett*, 2015, **27**, 714-723.
- 3 M. Ošek, G. Laudadio, N. P. van Leest, M. Dyga, A. d. A. Bartolomeu, L. J. Gooßen, B. de Bruin, K. T. de Oliveira and T. Noël, *Chem*, 2021, **7**, 255-266.
- 4 Y. Marcus, in *Ions in Solution and their Solvation*, 2015, DOI: 10.1002/9781118892336.ch4, pp. 107-155.
- 5 J. J. Fifen, *J. Chem. Theory Comput.*, 2013, **9**, 3165-3169.
- 6 A. A. Isse and A. Gennaro, *J. Phys. Chem. B*, 2010, **114**, 7894-7899.
- 7 J. W. Diggle and A. J. Parker, *Aust. J. Chem.*, 1974, **27**, 1617-1621.
